# Supplementary material for: Enhancing the stability of cobalt spinel oxide towards sustainable oxygen evolution in acid
Source: Springer Nature journal article supplement (doi:10.1038/s41929-021-00732-9), 2022-02-14
Supplement: 41929_2021_732_MOESM1_ESM.pdf [file 41929_2021_732_MOESM1_ESM.pdf]

**Supplementary information**

---

**Enhancing the stability of cobalt spinel  
oxide towards sustainable oxygen  
evolution in acid**

---

In the format provided by the  
authors and unedited

1  
2  
3  
4  
5  
6  
7  
8  
9  
10  
11  
12  
13  
14

## Supplementary Information

### **Enhancing the Stability of Cobalt Spinel Oxide Towards Sustainable Oxygen Evolution in Acid**

Ailong Li<sup>†</sup>, Shuang Kong<sup>†</sup>, Chenxi Guo<sup>†</sup>, Hideshi Ooka, Kiyohiro Adachi,  
Daisuke Hashizume, Qike Jiang, Hongxian Han, Jianping Xiao\* and Ryuhei Nakamura\*

\*Corresponding Authors. E-mail: xiao@dicp.ac.cn and ryuhei.nakamura@riken.jp

<sup>†</sup>These authors contributed equally to this work

|    |                                                                                                                                                                                                                                     |    |
|----|-------------------------------------------------------------------------------------------------------------------------------------------------------------------------------------------------------------------------------------|----|
| 1  | <b>Table of Contents (Sections Below are Based on the Main Text)</b>                                                                                                                                                                |    |
| 2  | <b>Catalyst Characterization</b> .....                                                                                                                                                                                              | 5  |
| 3  | Supplementary Figure 1. Rietveld refinement for $\text{Co}_2\text{MnO}_4$ before electrolysis.....                                                                                                                                  | 5  |
| 4  | Supplementary Figure 2. Rietveld refinement for $\text{Co}_2\text{MnO}_4$ after electrolysis for 4 hours. ....                                                                                                                      | 6  |
| 5  | Supplementary Figure 3. Rietveld refinement for $\text{Co}_2\text{MnO}_4$ after electrolysis for 23 hours. ....                                                                                                                     | 7  |
| 6  | Supplementary Figure 4. Characterization of $\text{Co}_2\text{MnO}_4$ on FTO. ....                                                                                                                                                  | 8  |
| 7  | Supplementary Figure 5. Normalized Co K-edge XANES spectra of $\text{Co}_2\text{MnO}_4$ . ....                                                                                                                                      | 9  |
| 8  | Supplementary Figure 6. Normalized Mn K-edge XANES spectra of $\text{Co}_2\text{MnO}_4$ . ....                                                                                                                                      | 10 |
| 9  | Supplementary Figure 7. Fourier transforms of Co K-edge and Mn K-edge EXAFS of $\text{Co}_2\text{MnO}_4$ . ....                                                                                                                     | 11 |
| 10 | Supplementary Figure 8. EXAFS fitting for standard samples of $\text{Co}_3\text{O}_4$ and $\beta\text{-MnO}_2$ . ....                                                                                                               | 12 |
| 11 | Supplementary Figure 9. Co K-edge EXAFS fitting for $\text{Co}_2\text{MnO}_4$ . ....                                                                                                                                                | 13 |
| 12 | Supplementary Figure 10. Mn K-edge EXAFS fitting for $\text{Co}_2\text{MnO}_4$ . ....                                                                                                                                               | 14 |
| 13 | Supplementary Figure 11. EXAFS simulation for $\text{Co}_2\text{MnO}_4$ with various occupancies. ....                                                                                                                              | 15 |
| 14 | Supplementary Figure 12. Raman spectra of $\text{Co}_2\text{MnO}_4$ . ....                                                                                                                                                          | 16 |
| 15 | Supplementary Figure 13. XPS $\text{Co}2p$ spectrum of $\text{Co}_2\text{MnO}_4$ . ....                                                                                                                                             | 17 |
| 16 | Supplementary Figure 14. XPS $\text{Mn}2p$ spectrum of $\text{Co}_2\text{MnO}_4$ . ....                                                                                                                                             | 18 |
| 17 | <b>Electrochemical Analysis</b> .....                                                                                                                                                                                               | 19 |
| 18 | Supplementary Figure 15. EIS plots of $\text{Co}_2\text{MnO}_4$ . ....                                                                                                                                                              | 19 |
| 19 | Supplementary Figure 16. Faradaic efficiency measurement. ....                                                                                                                                                                      | 20 |
| 20 | Supplementary Figure 17. Isotope distribution of dioxygen measured by GC-MS. ....                                                                                                                                                   | 21 |
| 21 | Supplementary Figure 18. Evaluation of $\text{H}_2\text{SO}_4$ oxidation by colorimetry. ....                                                                                                                                       | 22 |
| 22 | Supplementary Figure 19. LSVs of FTO, carbon plate, Pt/Ti plate and Pt/Ti mesh. ....                                                                                                                                                | 23 |
| 23 | Supplementary Figure 20. Images of electrodes with $\text{Co}_2\text{MnO}_4$ on FTO and Pt/Ti mesh. ....                                                                                                                            | 24 |
| 24 | Supplementary Figure 21. ECSA measurement of $\text{Co}_2\text{MnO}_4$ on FTO. ....                                                                                                                                                 | 25 |
| 25 | Supplementary Figure 22. ECSA measurement of $\text{Co}_2\text{MnO}_4$ on Pt/Ti mesh. ....                                                                                                                                          | 26 |
| 26 | Supplementary Figure 23. ECSA measurement of $\text{Co}_2\text{MnO}_4$ on carbon plate. ....                                                                                                                                        | 27 |
| 27 | Supplementary Figure 24. ECSA measurement of $\text{Co}_2\text{MnO}_4$ on Pt/Ti plate. ....                                                                                                                                         | 28 |
| 28 | Supplementary Figure 25. LSVs of $\text{Co}_3\text{O}_4$ , $\text{Co}_2\text{MnO}_4$ , $\text{CoMn}_2\text{O}_4$ , $\gamma\text{-MnO}_2$ and $\text{IrO}_2$ . ....                                                                  | 29 |
| 29 | Supplementary Figure 26. Comparisons of overpotential and mass activity with literature. ....                                                                                                                                       | 30 |
| 30 | Supplementary Figure 27. Tafel slopes of $\text{Co}_2\text{MnO}_4$ deposited on FTO. ....                                                                                                                                           | 31 |
| 31 | Supplementary Figure 28. Cyclic voltammogram of $\text{Co}_2\text{MnO}_4$ on FTO. ....                                                                                                                                              | 32 |
| 32 | Supplementary Figure 29. Photos of bubble generation on the $\text{Co}_2\text{MnO}_4$ electrode. ....                                                                                                                               | 33 |
| 33 | Supplementary Figure 30. Time dependence of Co dissolution. ....                                                                                                                                                                    | 34 |
| 34 | Supplementary Figure 31. STEM-EELS analysis of $\text{Co}_2\text{MnO}_4$ before and after electrolysis at $100 \text{ mA cm}^{-2}_{\text{geo}}$ for 23 hours in $\text{H}_2\text{SO}_4$ (pH 1) at $25 \text{ }^\circ\text{C}$ ..... | 35 |
| 35 | Supplementary Figure 32. Co $\text{L}_3$ edge fitting before and after electrolysis. ....                                                                                                                                           | 36 |
| 36 | Supplementary Figure 33. LSVs of $\text{Co}_2\text{MnO}_4$ after electrolysis for 4 hours and 23 hours. ....                                                                                                                        | 37 |

|    |                                                                                                                                                                  |    |
|----|------------------------------------------------------------------------------------------------------------------------------------------------------------------|----|
| 1  | Supplementary Figure 34. HRTEM images of $\text{Co}_2\text{MnO}_4$ before and after electrolysis at $100 \text{ mA cm}^{-2}_{\text{geo}}$                        |    |
| 2  | for 23 hours in $\text{H}_2\text{SO}_4$ (pH 1) at $25 \text{ }^\circ\text{C}$ .....                                                                              | 38 |
| 3  | Supplementary Figure 35. SR-PXRD patterns of $\text{Co}_2\text{MnO}_4$ before and after electrolysis. ....                                                       | 39 |
| 4  | Supplementary Figure 36. OER performance of (oxy)hydroxides in acid. ....                                                                                        | 40 |
| 5  | Supplementary Figure 37. XPS quantitative analysis of $\text{Co}_2\text{MnO}_4$ before and after electrolysis.....                                               | 41 |
| 6  | Supplementary Figure 38. XPS fitting of $\text{Co}_2\text{MnO}_4$ after electrolysis. ....                                                                       | 42 |
| 7  | <b>Evaluation of Catalyst Lifetime</b> .....                                                                                                                     | 43 |
| 8  | Supplementary Figure 39. CA measurements of $\text{Co}_2\text{MnO}_4$ on FTO. ....                                                                               | 43 |
| 9  | Supplementary Figure 40. CP measurements of $\text{Co}_2\text{MnO}_4$ on Pt/Ti mesh in $\text{H}_2\text{SO}_4$ . ....                                            | 44 |
| 10 | Supplementary Figure 41. CP measurements of $\text{Co}_2\text{MnO}_4$ on Pt/Ti mesh in $\text{H}_3\text{PO}_4$ . ....                                            | 45 |
| 11 | Supplementary Figure 42. Repeated CP measurements at $200 \text{ mA cm}^{-2}_{\text{geo}}$ . ....                                                                | 46 |
| 12 | Supplementary Figure 43. OER comparison of $\text{Co}_2\text{MnO}_4$ on FTO and glassy carbon. ....                                                              | 47 |
| 13 | Supplementary Figure 44. OER comparison between $\text{Co}_2\text{MnO}_4$ and $\text{MnO}_2$ . ....                                                              | 48 |
| 14 | Supplementary Figure 45. Time course of catalyst detachment during electrolysis.....                                                                             | 49 |
| 15 | Supplementary Figure 46. ICP-MS quantification of Mn detachment and dissolution. ....                                                                            | 50 |
| 16 | Supplementary Figure 47. SEM observation of catalyst detachment. ....                                                                                            | 51 |
| 17 | Supplementary Figure 48. Mass dependent stability measurements. ....                                                                                             | 52 |
| 18 | <b>DFT Calculation</b> .....                                                                                                                                     | 53 |
| 19 | Supplementary Figure 49. Surface structures of $\text{Co}_3\text{O}_4$ , $\text{CoMn}_2\text{O}_4$ and $\text{Co}_2\text{MnO}_4$ . ....                          | 53 |
| 20 | Supplementary Figure 50. Surface structures of $\lambda$ - $\text{MnO}_2$ , $\beta$ - $\text{MnO}_2$ and R- $\text{MnO}_2$ .....                                 | 54 |
| 21 | Supplementary Figure 51. A comparison between two O-O bond formation pathways. ....                                                                              | 55 |
| 22 | Supplementary Figure 52. Structures for solvent effect calculations. ....                                                                                        | 56 |
| 23 | Supplementary Figure 53. Comparison of activity on Co-deficient (Mn-rich) surfaces of $\text{Co}_2\text{MnO}_4$ . ....                                           | 57 |
| 24 | Supplementary Figure 54. The whole unit cell structure of $\text{Co}_2\text{MnO}_4$ . ....                                                                       | 58 |
| 25 | Supplementary Figure 55. Comparison of activity on $\text{Co}_2\text{MnO}_4$ with bulk defects. ....                                                             | 59 |
| 26 | Supplementary Figure 56. Calculated charge transfer and work function. ....                                                                                      | 60 |
| 27 | Supplementary Figure 57. Free energies of elementary steps in dissolution reaction. ....                                                                         | 61 |
| 28 | Supplementary Figure 58. Dissolution of O and Co on $\text{Co}_2\text{MnO}_4$ from a defect surface.....                                                         | 62 |
| 29 | Supplementary Figure 59. CP measurements of $\text{Co}_3\text{O}_4$ , $\text{Co}_2\text{MnO}_4$ , $\text{CoMn}_2\text{O}_4$ and $\gamma$ - $\text{MnO}_2$ . .... | 63 |
| 30 | <b>Supplementary Tables</b> .....                                                                                                                                | 64 |
| 31 | Supplementary Table 1. Structural parameters of $\text{Co}_2\text{MnO}_4$ from SR-PXRD Rietveld refinements. ..                                                  | 64 |
| 32 | Supplementary Table 2. Structural parameters of $\text{Co}_2\text{MnO}_4$ -4h from SR-PXRD Rietveld refinements.                                                 |    |
| 33 | .....                                                                                                                                                            | 65 |
| 34 | Supplementary Table 3. Structural parameters of $\text{Co}_2\text{MnO}_4$ -23h from SR-PXRD Rietveld refinements.                                                |    |
| 35 | .....                                                                                                                                                            | 66 |
| 36 | Supplementary Table 4. Fitting parameters of the Fourier-transformed $k^3$ -weighted Co K-edge EXAFS                                                             |    |
| 37 | spectra of $\text{Co}_3\text{O}_4$ .....                                                                                                                         | 67 |

|    |                                                                                                                                                        |    |
|----|--------------------------------------------------------------------------------------------------------------------------------------------------------|----|
| 1  | Supplementary Table 5. Fitting parameters of the Fourier-transformed $k^3$ -weighted Mn K-edge EXAFS                                                   |    |
| 2  | spectra of MnO <sub>2</sub> . .....                                                                                                                    | 68 |
| 3  | Supplementary Table 6. Fitting parameters of Fourier-transformed $k^3$ -weighted Co K-edge EXAFS                                                       |    |
| 4  | spectra of Co <sub>2</sub> MnO <sub>4</sub> before electrolysis and Co <sub>2</sub> MnO <sub>4</sub> after electrolysis .....                          | 69 |
| 5  | Supplementary Table 7. Fitting parameters of the Fourier-transformed $k^3$ -weighted Mn K-edge EXAFS                                                   |    |
| 6  | spectra of Co <sub>2</sub> MnO <sub>4</sub> before electrolysis and Co <sub>2</sub> MnO <sub>4</sub> after electrolysis .....                          | 70 |
| 7  | Supplementary Table 8. Fitting parameters of XPS Co2 <i>p</i> spectrum of Co <sub>2</sub> MnO <sub>4</sub> before electrolysis.                        | 71 |
| 8  | Supplementary Table 9. Fitting parameters of XPS Co2 <i>p</i> spectrum of Co <sub>2</sub> MnO <sub>4</sub> -4h .....                                   | 72 |
| 9  | Supplementary Table 10. Fitting parameters of XPS Co2 <i>p</i> spectrum of Co <sub>2</sub> MnO <sub>4</sub> -23h .....                                 | 73 |
| 10 | Supplementary Table 11. Fitting parameters of XPS Mn2 <i>p</i> spectrum of Co <sub>2</sub> MnO <sub>4</sub> before electrolysis.                       |    |
| 11 | .....                                                                                                                                                  | 74 |
| 12 | Supplementary Table 12. Fitting parameters of XPS Mn2 <i>p</i> spectrum of Co <sub>2</sub> MnO <sub>4</sub> -4h .....                                  | 75 |
| 13 | Supplementary Table 13. Fitting parameters of XPS Mn2 <i>p</i> spectrum of Co <sub>2</sub> MnO <sub>4</sub> -23h .....                                 | 76 |
| 14 | Supplementary Table 14. Activity and stability comparison of 3d catalysts in literature.....                                                           | 77 |
| 15 | Supplementary Table 15. Numerical data for the Ir- and Ru-based OER catalysts in Supplementary                                                         |    |
| 16 | Figure 26. ....                                                                                                                                        | 79 |
| 17 | Supplementary Table 16. Numerical data for non-noble metal catalysts in Supplementary Figure 26.                                                       |    |
| 18 | .....                                                                                                                                                  | 81 |
| 19 | Supplementary Table 17. Adsorption free energies for OH*, OOH* and O*. .....                                                                           | 82 |
| 20 | Supplementary Table 18. Comparisons of solvent effect with explicit or implicit models. ....                                                           | 83 |
| 21 | Supplementary Table 19. Hubbard <i>U</i> corrections effect on reaction energies.....                                                                  | 84 |
| 22 | Supplementary Table 20. Energy changes of Co and Mn sites in CoMn <sub>2</sub> O <sub>4</sub> and Co <sub>2</sub> MnO <sub>4</sub> <sup>#</sup> . .... | 85 |
| 23 | Supplementary Table 21. Description of the structures with local modifications. ....                                                                   | 86 |
| 24 | Supplementary Table 22. The degree of rate control analysis. ....                                                                                      | 87 |
| 25 | Supplementary Table 23. Two pathways describing catalyst dissolution reaction with different priority.                                                 |    |
| 26 | .....                                                                                                                                                  | 88 |
| 27 | Supplementary Table 24. Energetic data for the scheme of charge-extrapolation.....                                                                     | 89 |
| 28 | <b>Supplementary Notes</b> .....                                                                                                                       | 90 |
| 29 | Supplementary Note 1. Rietveld analysis .....                                                                                                          | 90 |
| 30 | Supplementary Note 2. Fitting and Simulation of EXAFS.....                                                                                             | 92 |
| 31 | Supplementary Note 3. Discussion on H <sub>2</sub> SO <sub>4</sub> oxidation for Supplementary figure 18 .....                                         | 94 |
| 32 | <b>Supplementary References</b> .....                                                                                                                  | 95 |
| 33 |                                                                                                                                                        |    |
| 34 |                                                                                                                                                        |    |

# 1 Catalyst Characterization

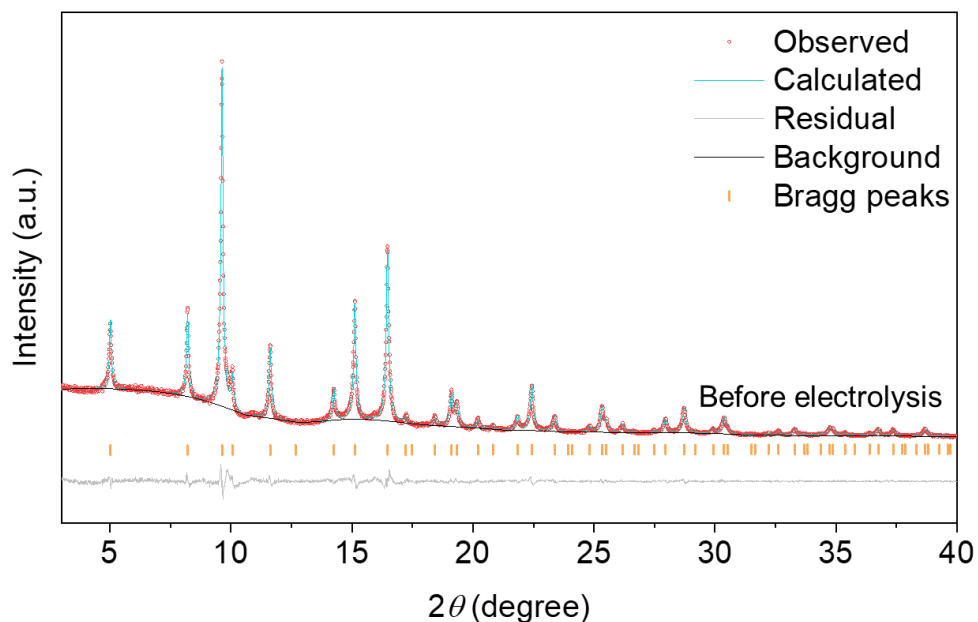

2  
3 **Supplementary Figure 1. Rietveld refinement for  $\text{Co}_2\text{MnO}_4$  before electrolysis.** Rietveld  
4 refinement for the synchrotron radiation powder X-ray diffraction (SR-PXRD) profile of  
5  $\text{Co}_2\text{MnO}_4$  before electrolysis. The experimental data are shown in red. The fitted curve, residual,  
6 and Bragg peaks are shown in light blue, grey, and brown, respectively. The structural  
7 parameters derived from Rietveld refinement were given in Supplementary Table 1. Detailed  
8 procedures for Rietveld refinement are provided in the Supplementary Note 1.

9  
10  
11

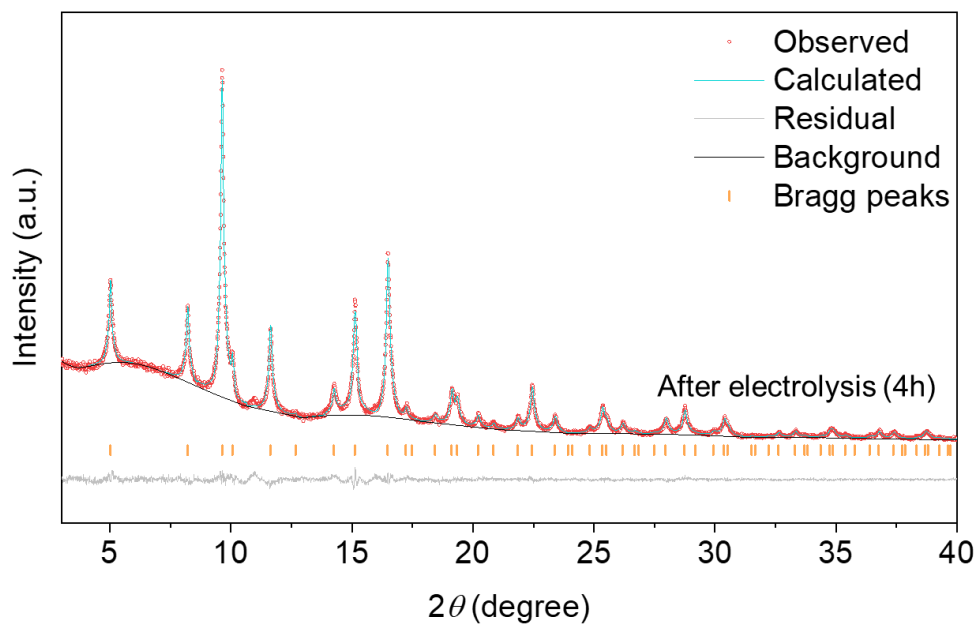

1

2 **Supplementary Figure 2. Rietveld refinement for  $\text{Co}_2\text{MnO}_4$  after electrolysis for 4 hours.**

3 Rietveld refinement for the SR-PXRD profile of  $\text{Co}_2\text{MnO}_4$  after electrolysis at  $100 \text{ mA cm}^{-2}_{\text{geo}}$   
 4 (pH 1  $\text{H}_2\text{SO}_4$ ,  $25 \text{ }^\circ\text{C}$ ) for 4 hours. The experimental data are shown in red. The fitted curve,  
 5 residual, and Bragg peaks are shown in light blue, grey, and brown, respectively. The structural  
 6 parameters derived from Rietveld refinement were given in Supplementary Table 2. Detailed  
 7 procedures for Rietveld refinement are provided in the Supplementary Note 1.

8

9

1

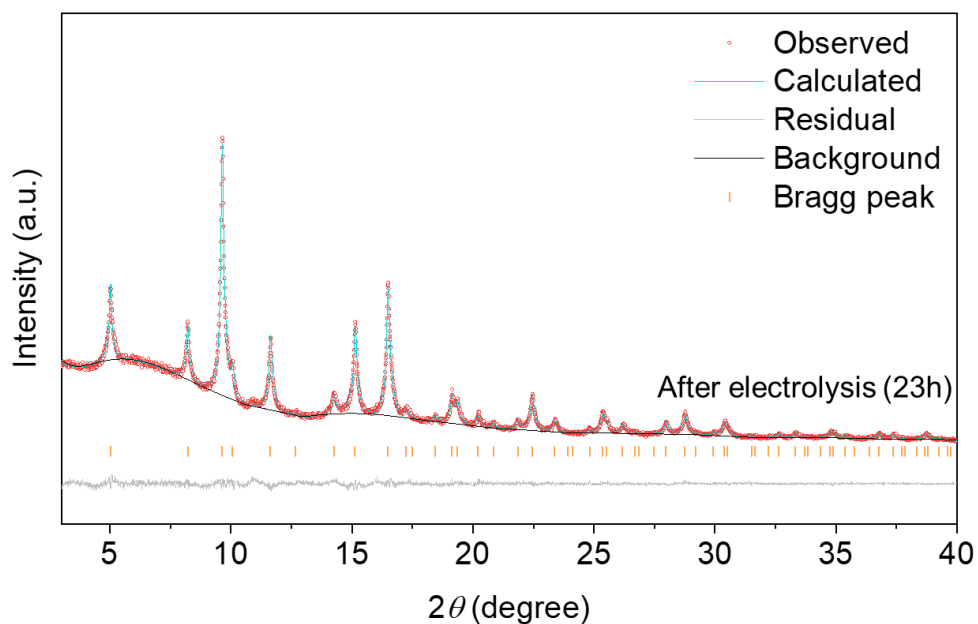

2

3 **Supplementary Figure 3. Rietveld refinement for  $\text{Co}_2\text{MnO}_4$  after electrolysis for 23**  
4 **hours.** Rietveld refinement for the SR-PXRD profile of  $\text{Co}_2\text{MnO}_4$  after electrolysis at 100 mA  
5  $\text{cm}^{-2}_{\text{geo}}$  (pH 1  $\text{H}_2\text{SO}_4$ , 25 °C) for 23 hours. The experimental data are shown in red. The fitted  
6 curve, residual, and Bragg peaks are shown in light blue, grey, and brown, respectively. The  
7 structural parameters derived from Rietveld refinement were given in Supplementary Table 3.  
8 Detailed procedures for Rietveld refinement are provided in the Supplementary Note 1.

9



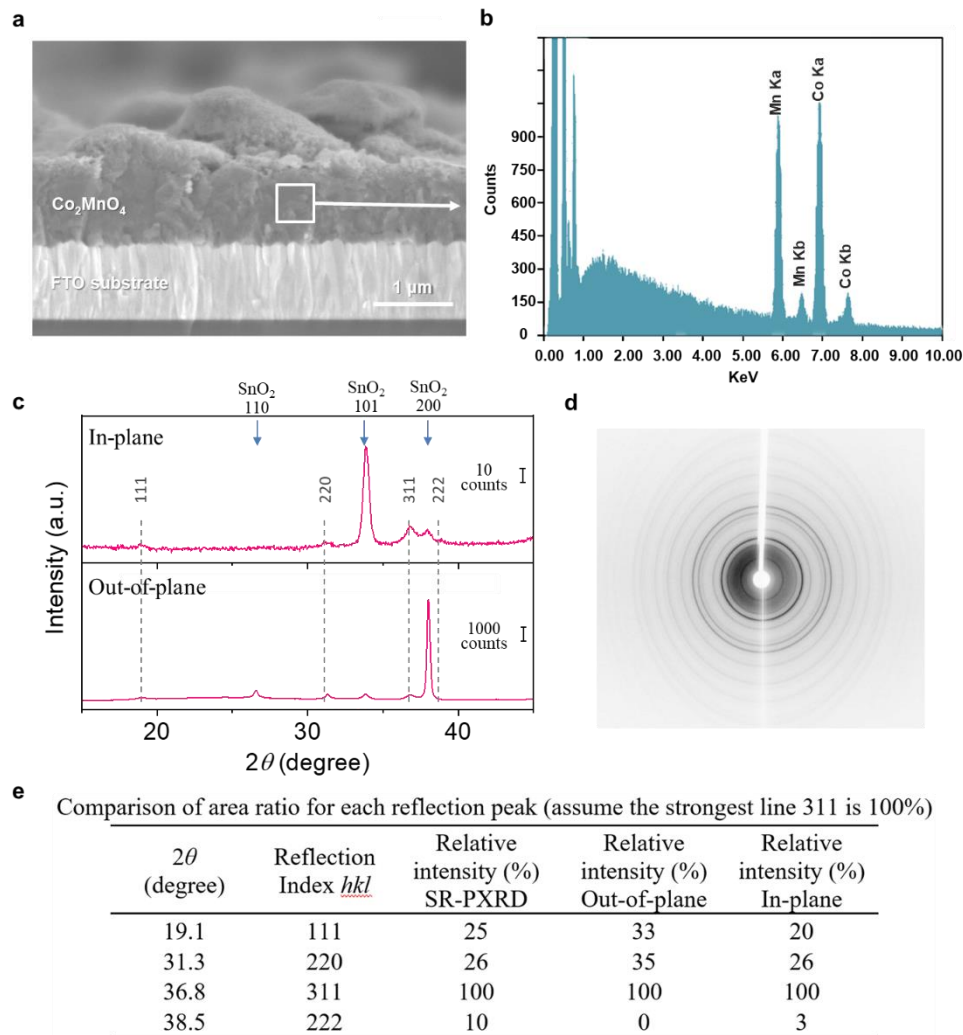

1  
2  
3  
4  
5  
6  
7  
8  
9  
10  
11  
12  
13  
14  
15

**Supplementary Figure 4. Characterization of  $\text{Co}_2\text{MnO}_4$  on FTO.** **a**, Cross-sectional SEM image of  $\text{Co}_2\text{MnO}_4$  on the FTO substrate. Scale bar, 1  $\mu\text{m}$ . **b**, Energy-dispersive X-ray spectroscopy (EDX) spectrum of  $\text{Co}_2\text{MnO}_4$  corresponding to the square region in **(a)**, suggesting the atomic ratio of Co:Mn was 2:1. The Co:Mn atomic ratio of 2:1 was also confirmed by inductively coupled plasma mass spectrometry (ICP-MS) (Agilent7700). **c**, In-plane and out-of-plane XRD patterns of  $\text{Co}_2\text{MnO}_4$  on FTO substrates. The positions and intensity ratios of these peaks were in good agreement with the diffraction pattern of the sample in an unoriented capillary measured by synchrotron radiation, suggesting the  $\text{Co}_2\text{MnO}_4$  has no specific orientation **(e)**. The lack of orientation can be confirmed based on the uniform Debye-Scherrer rings **(d)**. For samples with strong preferred orientation, discrete spots (or arcs) will be observed.

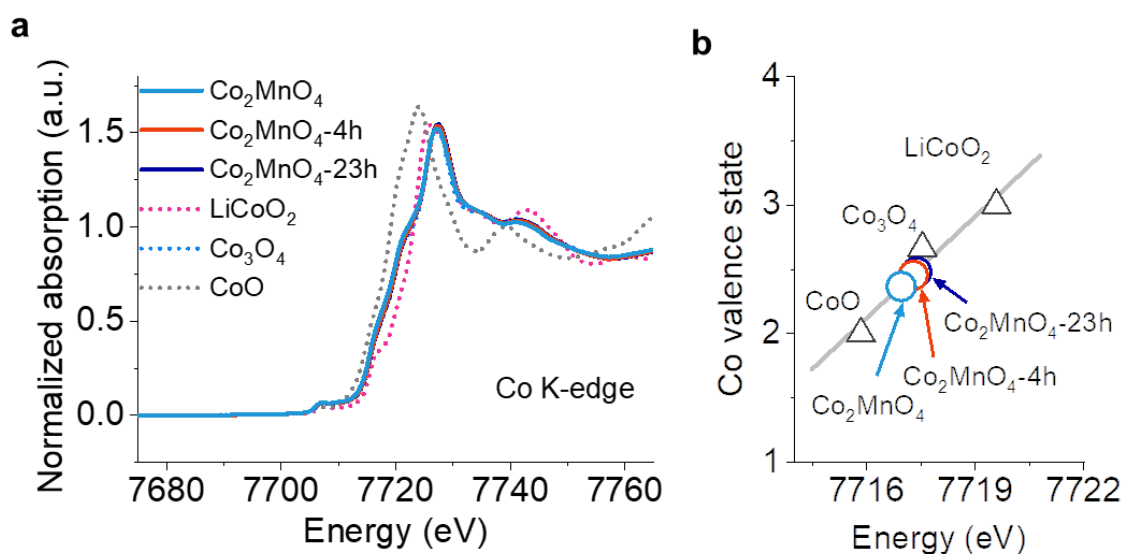

1  
2  
3  
4  
5  
6  
7  
8  
9  
10  
11

**Supplementary Figure 5. Normalized Co K-edge XANES spectra of  $\text{Co}_2\text{MnO}_4$ .** **a**, Normalized Co K-edge XANES spectra of  $\text{Co}_2\text{MnO}_4$  before and after electrolysis at 100 mA  $\text{cm}^{-2}_{\text{geo}}$  (pH 1  $\text{H}_2\text{SO}_4$ , 25 °C) for 4 hours ( $\text{Co}_2\text{MnO}_4\text{-4h}$ ) and 23 hours ( $\text{Co}_2\text{MnO}_4\text{-23h}$ ). The XANES spectra for  $\text{Co}_2\text{MnO}_4$  before and after electrolysis for 23 hours were also presented in the main text. **b**, The K-edge position (defined as the energy where the normalized absorption is 0.5) vs Co oxidation states.  $\text{CoO}$ ,  $\text{Co}_3\text{O}_4$  and  $\text{LiCoO}_2$  were tested as reference samples with known Co valence. The valence states of Co were determined to be 2.37, 2.45 and 2.48 for  $\text{Co}_2\text{MnO}_4$  (before electrolysis),  $\text{Co}_2\text{MnO}_4\text{-4h}$  and  $\text{Co}_2\text{MnO}_4\text{-23h}$ , respectively.

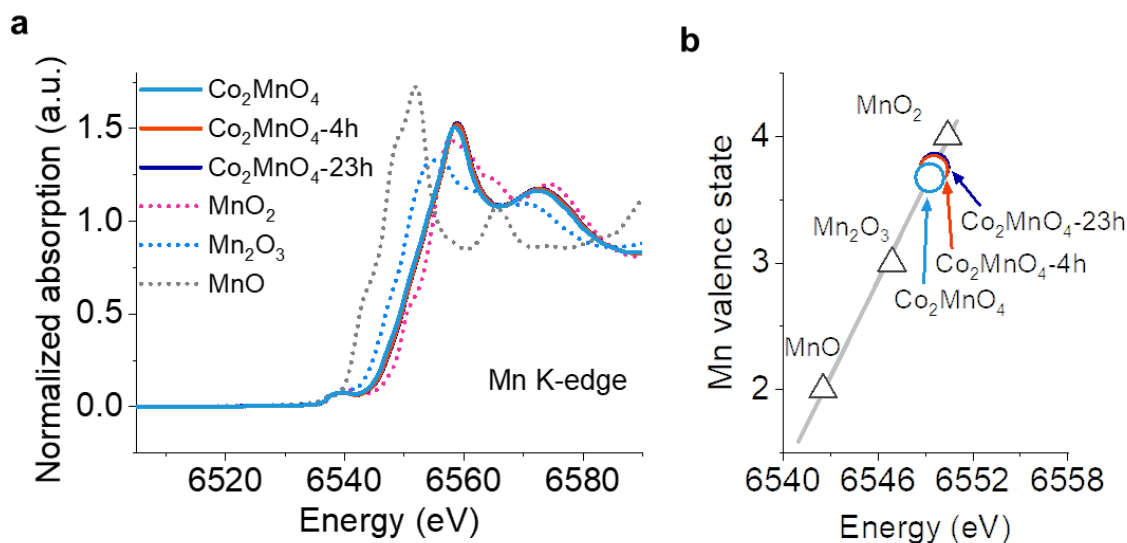

1  
2  
3  
4  
5  
6  
7  
8  
9  
10  
11  
12  
13

**Supplementary Figure 6. Normalized Mn K-edge XANES spectra of Co<sub>2</sub>MnO<sub>4</sub>.**

Normalized Mn K-edge XANES spectra of Co<sub>2</sub>MnO<sub>4</sub> before and after electrolysis at 100 mA cm<sup>-2</sup><sub>geo</sub> (pH 1 H<sub>2</sub>SO<sub>4</sub>, 25 °C) for 4 hours (Co<sub>2</sub>MnO<sub>4</sub>-4h) and 23 hours (Co<sub>2</sub>MnO<sub>4</sub>-23h). The XANES spectra for Co<sub>2</sub>MnO<sub>4</sub> before and after electrolysis for 23 hours were also presented in the main text. **b**, The K-edge position (defined as the energy where the normalized absorption is 0.5) Mn oxidation states. MnO, Mn<sub>2</sub>O<sub>3</sub> and MnO<sub>2</sub> were tested as reference samples with known Mn valence. The valence states of Mn were determined to be 3.67, 3.74 and 3.76 for Co<sub>2</sub>MnO<sub>4</sub> (before electrolysis), Co<sub>2</sub>MnO<sub>4</sub>-4h and Co<sub>2</sub>MnO<sub>4</sub>-23h, respectively.

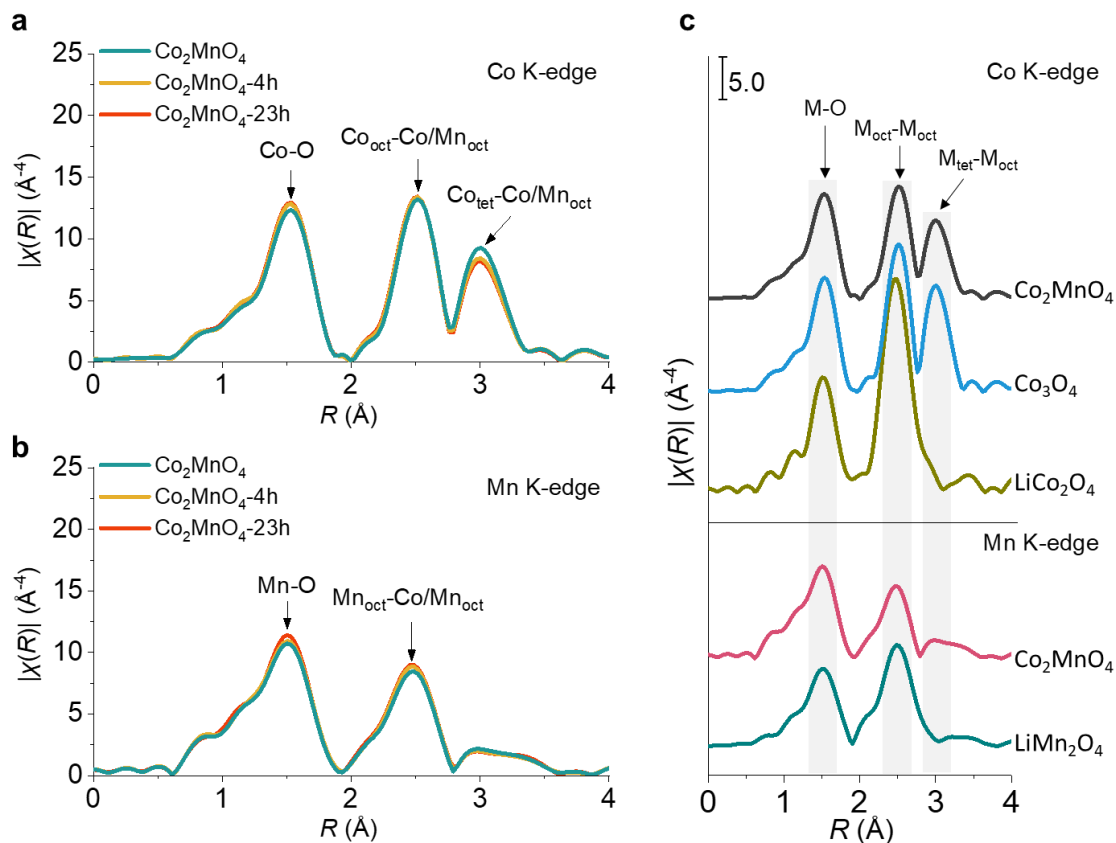

1  
 2 **Supplementary Figure 7. Fourier transforms of Co K-edge and Mn K-edge EXAFS of**  
 3  **$\text{Co}_2\text{MnO}_4$ .** Fourier transforms of Co K-edge (a) and Mn K-edge (b) EXAFS data for the  
 4  $\text{Co}_2\text{MnO}_4$  before and after electrolysis at  $100 \text{ mA cm}^{-2}_{\text{geo}}$  (pH 1  $\text{H}_2\text{SO}_4$ ,  $25 \text{ }^\circ\text{C}$ ) for 4 hours  
 5 ( $\text{Co}_2\text{MnO}_4$ -4h) and 23 hours ( $\text{Co}_2\text{MnO}_4$ -23h). “tet” and “oct” represent tetrahedral site (A-site)  
 6 and octahedral site (B-site) in a spinel structure ( $\text{AB}_2\text{O}_4$ ), respectively. The EXAFS results for  
 7  $\text{Co}_2\text{MnO}_4$  before and after electrolysis for 23 hours were also present in the main text. c, A  
 8 comparison of EXAFS data for the  $\text{Co}_2\text{MnO}_4$  and reference spinel oxides with known Co and  
 9 Mn coordination environment, such as  $\text{Co}_3\text{O}_4$  (Co on both octahedral and tetragonal sites),  
 10  $\text{LiCo}_2\text{O}_4$  (Co on octahedral sites) and  $\text{LiMn}_2\text{O}_4$  (Mn on octahedral sites). Standard samples of  
 11  $\text{Co}_3\text{O}_4$  and  $\text{LiCo}_2\text{O}_4$  were test in this study. XAFS spectrum of standard sample  $\text{LiMn}_2\text{O}_4$  is  
 12 utilized by SPring-8 BL14B2 XAFS database.

13  
 14

1

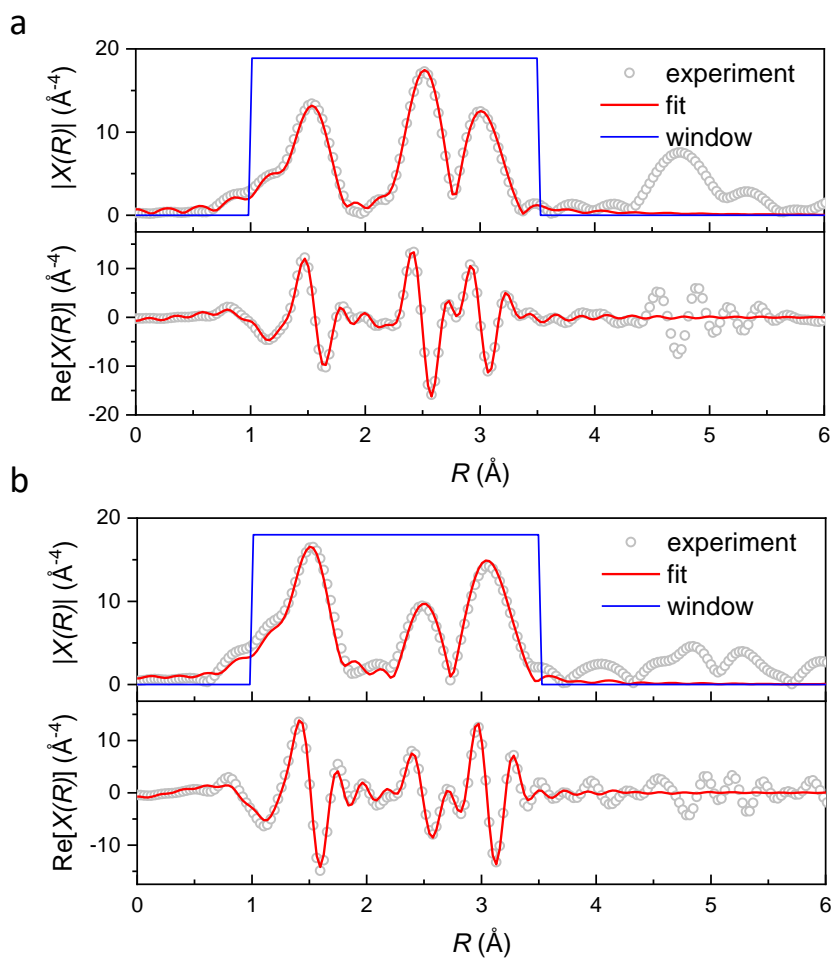

2

### 3 **Supplementary Figure 8. EXAFS fitting for standard samples of $\text{Co}_3\text{O}_4$ and $\beta\text{-MnO}_2$ .**

4 Fitting analysis of Fourier-transformed  $k^3$ -weighted Co K-edge EXAFS measurement of  $\text{Co}_3\text{O}_4$   
 5 (a) and Mn K-edge EXAFS measurement of  $\text{MnO}_2$  (b). The fitting was conducted within the  
 6  $R$  range of 1-3.5 Å, and optimized parameters can be found in Supplementary Table 4 (Co K-  
 7 edge of  $\text{Co}_3\text{O}_4$ ) and Supplementary Table 5 (Mn K-edge of  $\text{MnO}_2$ ). In both (a) and (b), the  
 8 upper panel shows the magnitude of FT-EXAFS, and the lower panel shows its real part.  
 9 Detailed procedures for fitting are provided in the Supplementary Note 2.

10

11

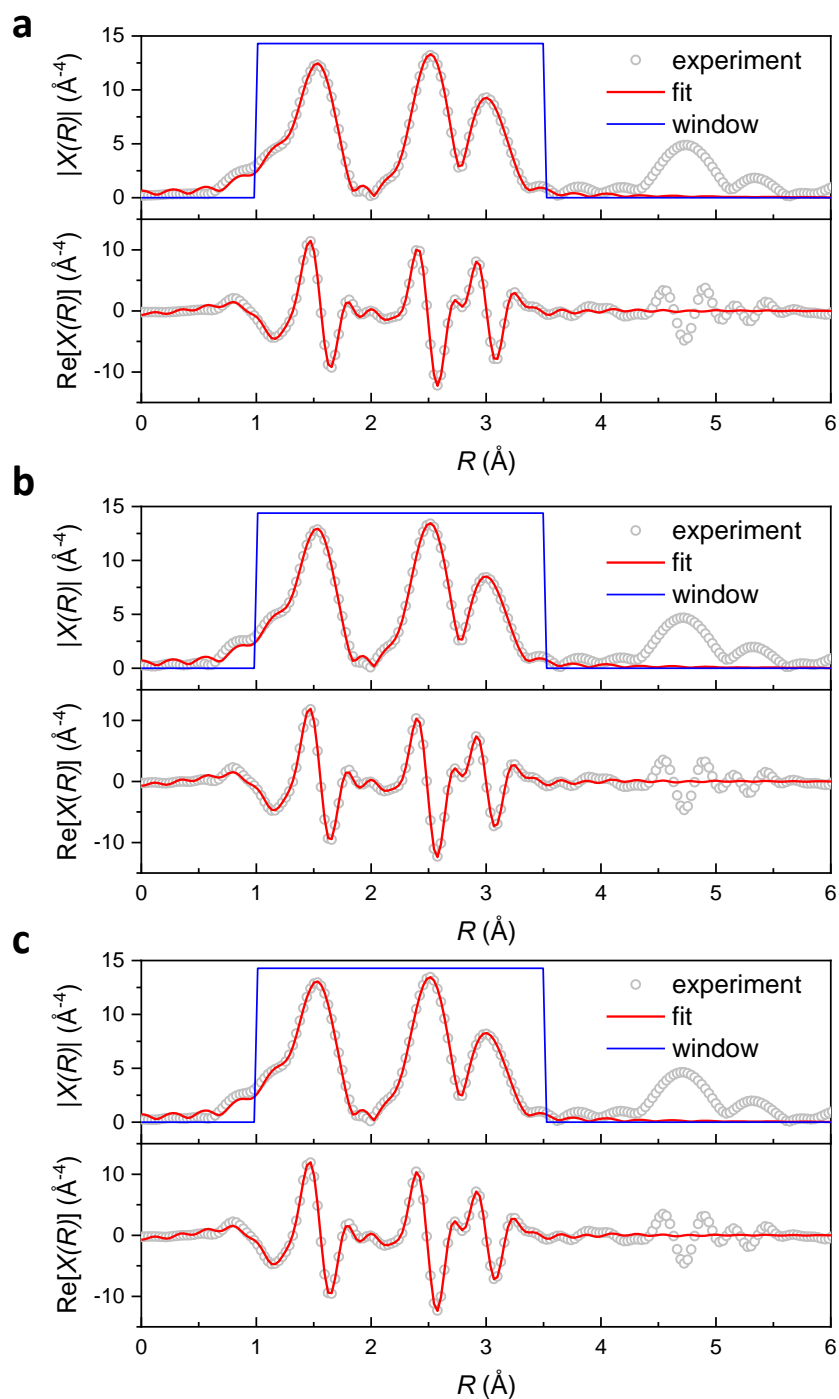

1  
2 **Supplementary Figure 9. Co K-edge EXAFS fitting for  $\text{Co}_2\text{MnO}_4$ .** Fitting analysis of  
3 Fourier-transformed  $k^3$ -weighted Co K-edge EXAFS measurements before (a) and after  
4 electrolysis for 4 hours (b) and 23 hours (c). Electrolysis was conducted at  $100 \text{ mA cm}^{-2}_{\text{geo}}$  in  
5 pH 1  $\text{H}_2\text{SO}_4$  at  $25 \text{ }^\circ\text{C}$ . The fitting was conducted within the  $R$  range of  $1\text{-}3.5 \text{ \AA}$ , and optimized  
6 parameters can be found in Supplementary Table 6. In (a), (b) and (c), the upper panel shows  
7 the magnitude of FT-EXAFS, and the lower panel shows its real part. Detailed procedures for  
8 fitting are provided in the Supplementary Note 2.

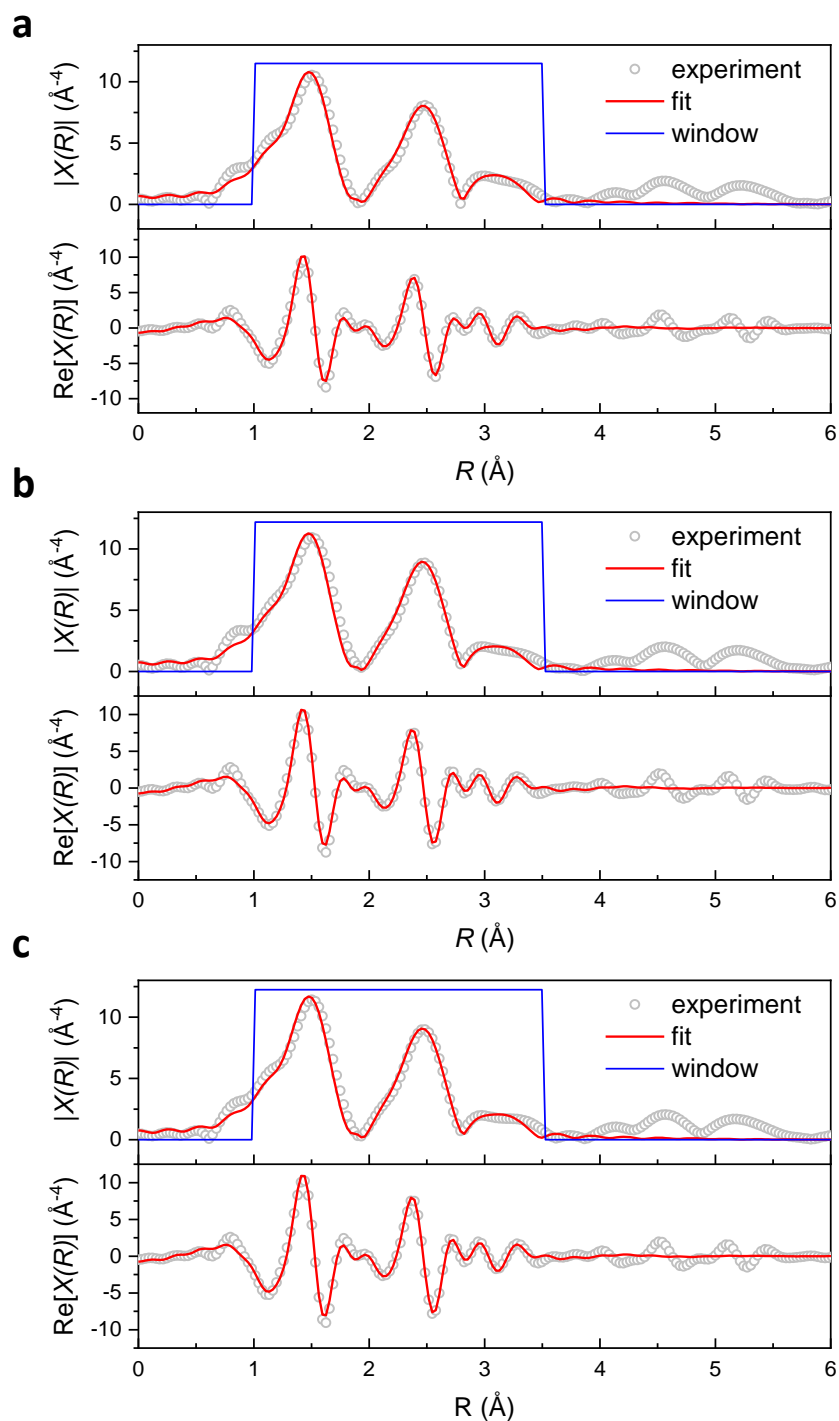

1  
2 **Supplementary Figure 10. Mn K-edge EXAFS fitting for  $\text{Co}_2\text{MnO}_4$ .** Fitting analysis of  
3 Fourier-transformed  $k^3$ -weighted Mn K-edge EXAFS measurements before (a) and after  
4 electrolysis for 4 hours (b) and 23 hours (c). Electrolysis was conducted at  $100 \text{ mA cm}^{-2}_{\text{geo}}$  in  
5 pH 1  $\text{H}_2\text{SO}_4$  at  $25 \text{ }^\circ\text{C}$ . The fitting was conducted within the  $R$  range of  $1\text{-}3.5 \text{ \AA}$ , and optimized  
6 parameters can be found in Supplementary Table 7. In (a), (b) and (c), the upper panel shows  
7 the magnitude of FT-EXAFS, and the lower panel shows its real part. Detailed procedures for  
8 fitting are provided in the Supplementary Note 2.

1

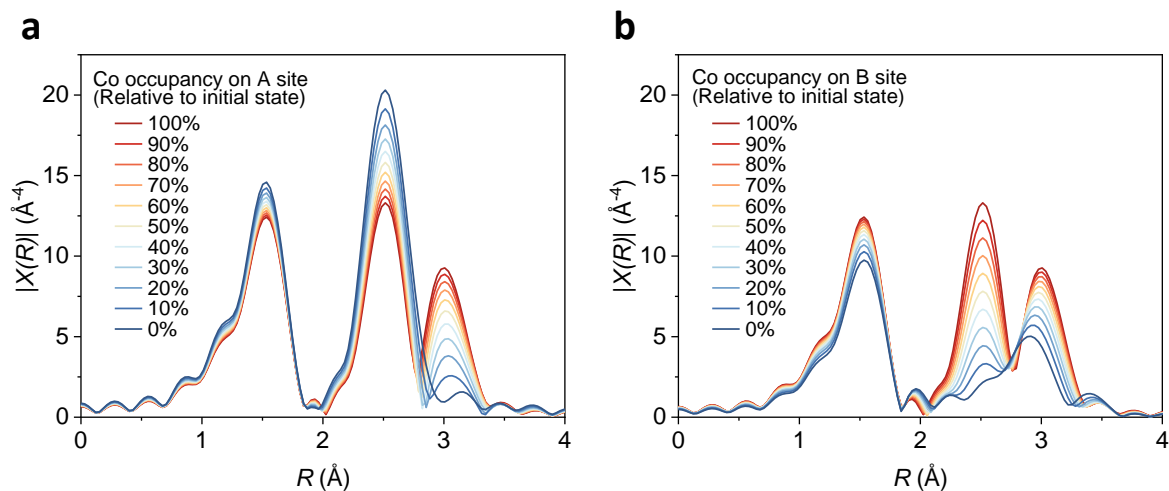

2

3 **Supplementary Figure 11. EXAFS simulation for  $\text{Co}_2\text{MnO}_4$  with various occupancies.**

4 Simulated EXAFS data of spinel  $\text{Co}_2\text{MnO}_4$  at various occupancies at the Co A-site (**a**) and B-

5

6 site (**b**). No structural parameters other than the occupancy was changed across the simulations.

6

7 Detailed procedures for simulation are provided in the Supplementary Note 2. The occupancies

7

8 indicated are relative to the occupancies of the as-synthesized material (84% for the A-site, 53%

8

9 for the B-site).

9

10



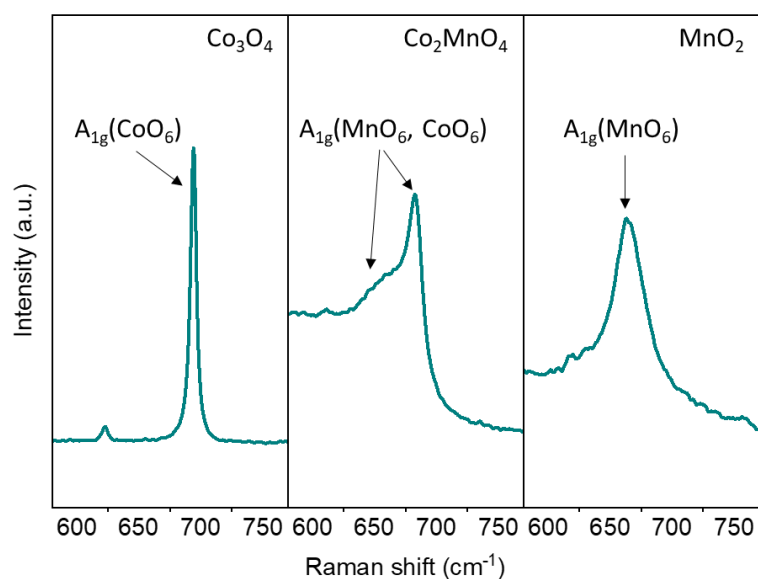

1

2 **Supplementary Figure 12. Raman spectra of  $\text{Co}_2\text{MnO}_4$ .** Raman spectra revealed  
 3 characteristic symmetric stretching vibration bands ( $A_{1g}$ ) of octahedral sites at  $650\text{-}700\text{ cm}^{-1}$   
 4 (refs.<sup>1-3</sup>). This is a single peak in spinel  $\text{Co}_3\text{O}_4$  and rutile  $\text{MnO}_2$ , whereas it splits into two  
 5 components in the case of  $\text{Co}_2\text{MnO}_4$  due to the coexistence of octahedral based on both  $\text{MnO}_6$   
 6 (ref. <sup>1</sup>) and  $\text{CoO}_6$  (refs. <sup>2,3</sup>). The Raman modes at  $620\text{ cm}^{-1}$  ( $F_{2g}$ ) are assigned to combined  
 7 vibrations of tetrahedral site and octahedral oxygen motions<sup>4</sup>.

8

1

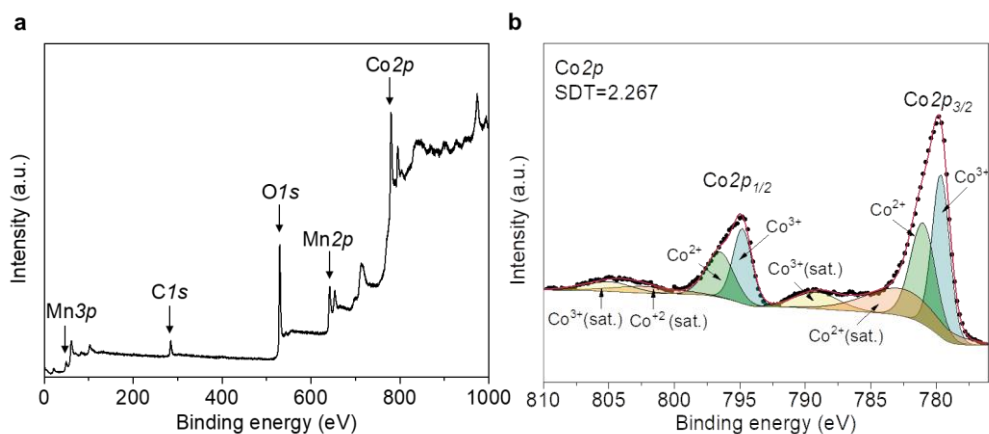

2

3

4

5 **Supplementary Figure 13. XPS Co<sub>2p</sub> spectrum of Co<sub>2</sub>MnO<sub>4</sub>.** a, XPS survey spectrum of  
6 the Co<sub>2</sub>MnO<sub>4</sub> catalyst. b, High resolution spectrum of Co<sub>2p</sub> region. The Co<sub>2p</sub> spectrum was  
7 fitted by considering two spin-orbit doublets characteristic of Co<sup>2+</sup> (refs. <sup>5,6</sup>), Co<sup>3+</sup> (ref. <sup>7</sup>) and  
8 shakeup satellites. XPS fitting<sup>5-7</sup> analysis shows that the ratio of Co<sup>2+</sup>:Co<sup>3+</sup> is approximate 1:1,  
9 indicating the average valence state of Co is about 2.50. All high-resolution spectra were  
10 collected using a pass energy of 23.5 eV and calibrated using the C1s peak at 284.6 eV. Co<sub>2p</sub>  
11 spectral fitting parameters are presented in the Supplementary Table 8.

12

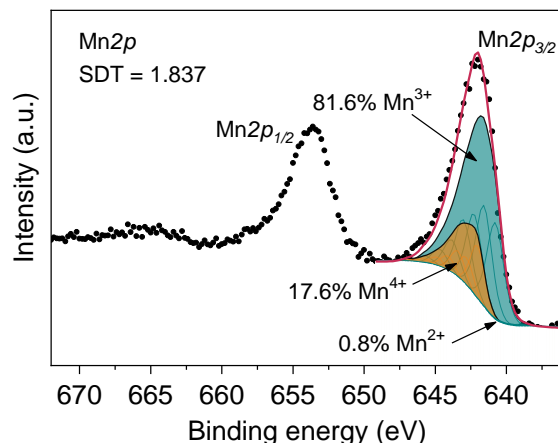

1

2 **Supplementary Figure 14. XPS Mn2p spectrum of Co<sub>2</sub>MnO<sub>4</sub>.** XPS spectra of Mn2p in  
 3 Co<sub>2</sub>MnO<sub>4</sub> catalyst. An determination of Mn oxidation states can be obtained by Mn2p<sub>3/2</sub>  
 4 fitting<sup>8</sup>. The predominant oxidation states are Mn<sup>3+</sup> (81.6%) and Mn<sup>4+</sup> (17.6%), indicating the  
 5 average valence state of Mn is about 3.16. Mn<sup>2+</sup> (0.8%) is within the detection limit of XPS (1  
 6 at.%) and is ignored in the analysis. The spectra were obtained using a pass energy of 23.5 eV  
 7 and calibrated using the C1s peak at 284.6 eV. The absolute octahedral site preference energies  
 8 from the literature<sup>9,10</sup> increase in the order Co<sup>2+</sup> (31.0 kJ mol<sup>-1</sup>) < Co<sup>3+</sup> (79.5 kJ mol<sup>-1</sup>) <  
 9 Mn<sup>3+</sup>/Mn<sup>4+</sup> (95.2 kJ mol<sup>-1</sup>), indicating that Mn<sup>3+</sup>/Mn<sup>4+</sup> together with Co<sup>3+</sup> prefer to occupy the  
 10 octahedral sites while Co<sup>2+</sup> tends to occupy the tetrahedral sites in the spinel structure of  
 11 Co<sub>2</sub>MnO<sub>4</sub>. The site preference is also consistent with our EXAFS data (Supplementary Fig. 7)  
 12 and Rietveld refinements (Supplementary Figs. 1-3). Mn2p spectral fitting parameters are  
 13 presented in the Supplementary Table 11.

# 1 Electrochemical Analysis

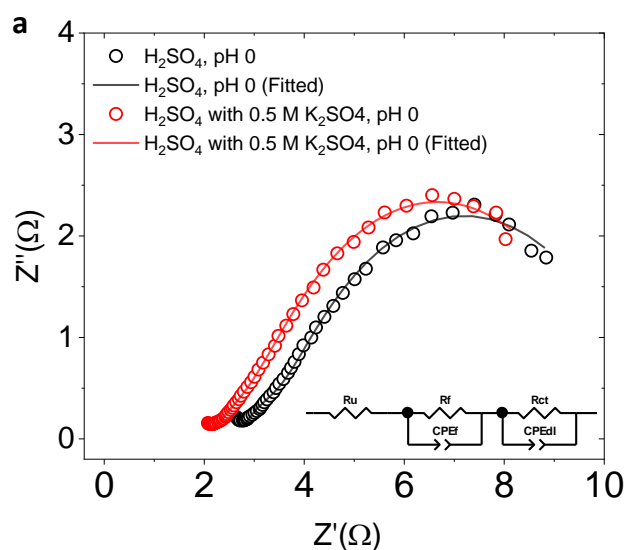

3

4

5

6

7

8

9

10

11

12

13

14

15

**b**

|                            | $\text{H}_2\text{SO}_4$<br>pH 0 | $\text{H}_2\text{SO}_4$ with 0.5 M<br>$\text{K}_2\text{SO}_4$ , pH 0 |
|----------------------------|---------------------------------|----------------------------------------------------------------------|
| $R/\Omega$                 | 2.6                             | 2.2                                                                  |
| $R_f/\Omega$               | 1.36                            | 0.66                                                                 |
| $\text{CPE}_f/\text{F}$    | 0.06                            | 0.04                                                                 |
| $R_{ct}/\Omega$            | 6.8                             | 7.84                                                                 |
| $\text{CPE}_{dl}/\text{F}$ | 0.1                             | 0.1                                                                  |

**Supplementary Figure 15. EIS plots of  $\text{Co}_2\text{MnO}_4$ .** **a**, EIS profiles of  $\text{Co}_2\text{MnO}_4$  on the FTO substrate in  $\text{H}_2\text{SO}_4$  (pH 0) and  $\text{H}_2\text{SO}_4$  with 0.5 M  $\text{K}_2\text{SO}_4$  (pH 0), measured at 1.7 V vs. RHE, from 100 kHz to 0.1 Hz. Geometric area,  $0.28 \text{ cm}^2$ . The equivalent circuit used to model the data is shown as an inset. The electrical circuit<sup>11</sup> consists of the solution resistance ( $R$ ), film resistance ( $R_f$ ), and charge transfer resistance ( $R_{ct}$ ). The capacitive elements used,  $\text{CPE}_f$  and  $\text{CPE}_{dl}$ , represent the constant phase element of the film and the electrical double layer, respectively. The fitting parameters are presented in **(b)**. The ohmic resistance was suppressed by adding 0.5 M  $\text{K}_2\text{SO}_4$  to the electrolyte. Therefore, we added  $\text{K}_2\text{SO}_4$  for all experiments unless otherwise specified.

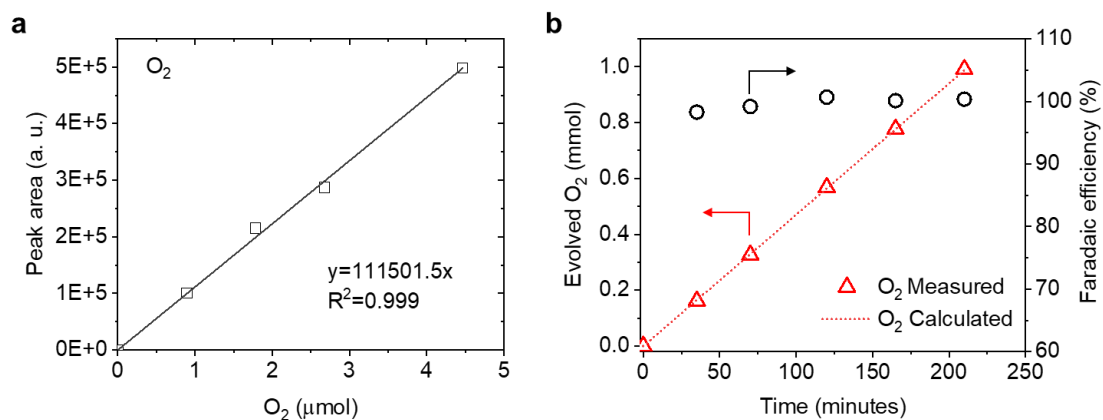

1

2 **Supplementary Figure 16. Faradaic efficiency measurement. a**, GC-MS calibration curve  
 3 for O<sub>2</sub>. **b**, Faradaic efficiency (black circles) of OER on Co<sub>2</sub>MnO<sub>4</sub> deposited on FTO at a  
 4 constant current density of 100 mA cm<sup>-2</sup><sub>geo</sub> in pH 1 H<sub>2</sub>SO<sub>4</sub> at 25 °C. The Faradaic efficiency  
 5 was calculated by dividing the amount of evolved oxygen observed from GC measurements  
 6 (red triangles) with the amount of oxygen expected from the charge passing through the  
 7 working electrode. The red dotted line corresponds to 100% Faradaic efficiency.

8

9

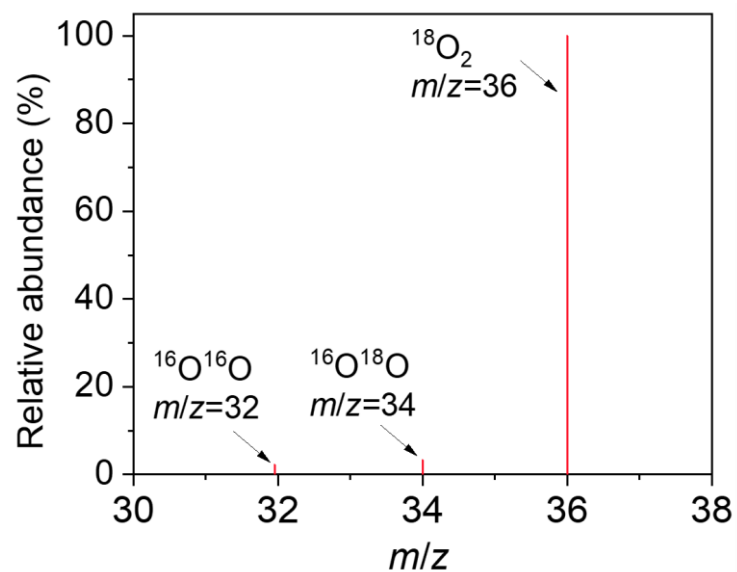

1

2 **Supplementary Figure 17. Isotope distribution of dioxygen measured by GC-MS.** OER  
 3 was conducted in  $\text{H}_2^{18}\text{O}$  ( $^{18}\text{O}$  purity  $\geq 98$  atom%) using  $\text{H}_2\text{S}^{16}\text{O}_4$  as the electrolyte at pH 0, at  
 4  $100 \text{ mA cm}^{-2}_{\text{geo}}$  (roughly 1.72 V vs RHE, after  $iR$  correction) for 23 h. The peak at  $m/z = 32$  is  
 5 due to atmospheric contamination, as it can be observed at similar levels even if pure He was  
 6 injected ( $\text{O}_2$  injection: 31269 counts, He injection: 30012 counts).

7

8

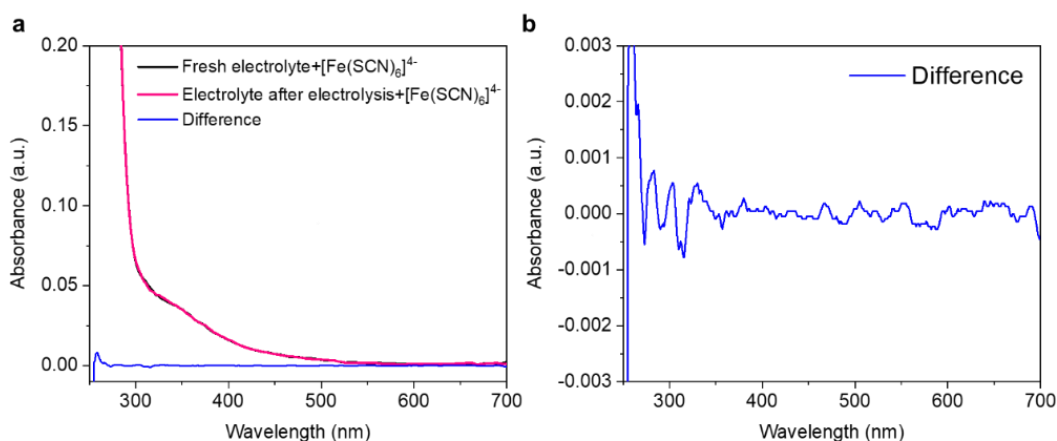

1  
2 **Supplementary Figure 18. Evaluation of H<sub>2</sub>SO<sub>4</sub> oxidation by colorimetry. a**, UV-Vis  
3 spectra of the electrolyte with 5 mM [Fe(SCN)<sub>6</sub>]<sup>4-</sup>. The electrolyte was sampled before and  
4 after electrolysis at 100 mA cm<sup>-2</sup><sub>geo</sub> (1.72 V vs RHE after *iR* correction) for 23 hours. The  
5 subtracted spectrum was enlarged and shown in (b). No peak assignable to [Fe(CN)<sub>6</sub>]<sup>3-</sup> could  
6 be observed (molar extinction coefficient = 6120 M<sup>-1</sup>cm<sup>-1</sup> at 470 nm), showing that the  
7 possibility of [Fe(SCN)<sub>6</sub>]<sup>3-</sup> formation by the oxidation of [Fe(CN)<sub>6</sub>]<sup>4-</sup> by S<sub>2</sub>O<sub>8</sub><sup>2-</sup> is below the  
8 detection limit (1.6×10<sup>-4</sup> mM). These results indicate H<sub>2</sub>SO<sub>4</sub> oxidation is negligible during  
9 the OER process on Co<sub>2</sub>MnO<sub>4</sub>. Furthermore, we have added a discussion section in  
10 Supplementary Note 3 to deny the possibility of H<sub>2</sub>SO<sub>4</sub> oxidation during electrolysis.

11  
12  
13

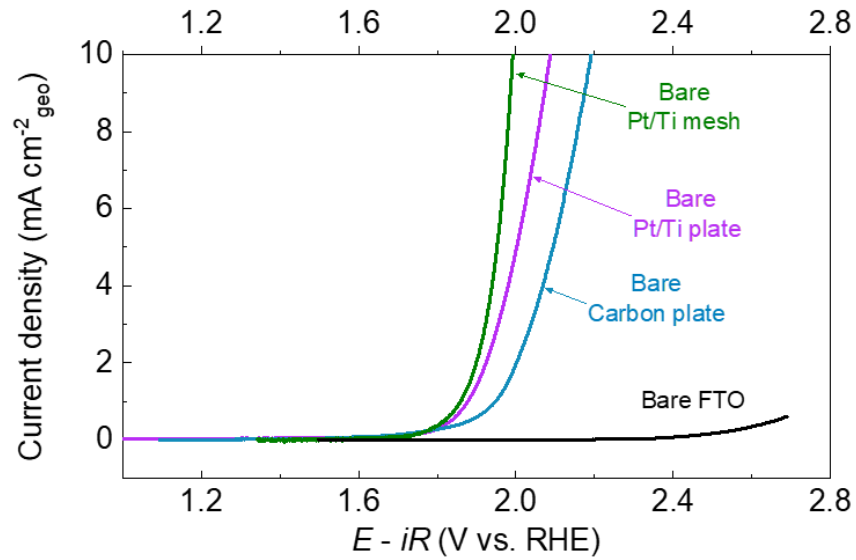

1  
2 **Supplementary Figure 19. LSVs of FTO, carbon plate, Pt/Ti plate and Pt/Ti mesh.** Linear  
3 sweep voltammograms (LSVs) of bare FTO substrate, bare carbon plate, bare Pt/Ti plate and  
4 bare Pt/Ti mesh in H<sub>2</sub>SO<sub>4</sub> (pH 0) at 25 °C after  $iR$  correction. Scan rate, 10 mV s<sup>-1</sup>.  
5



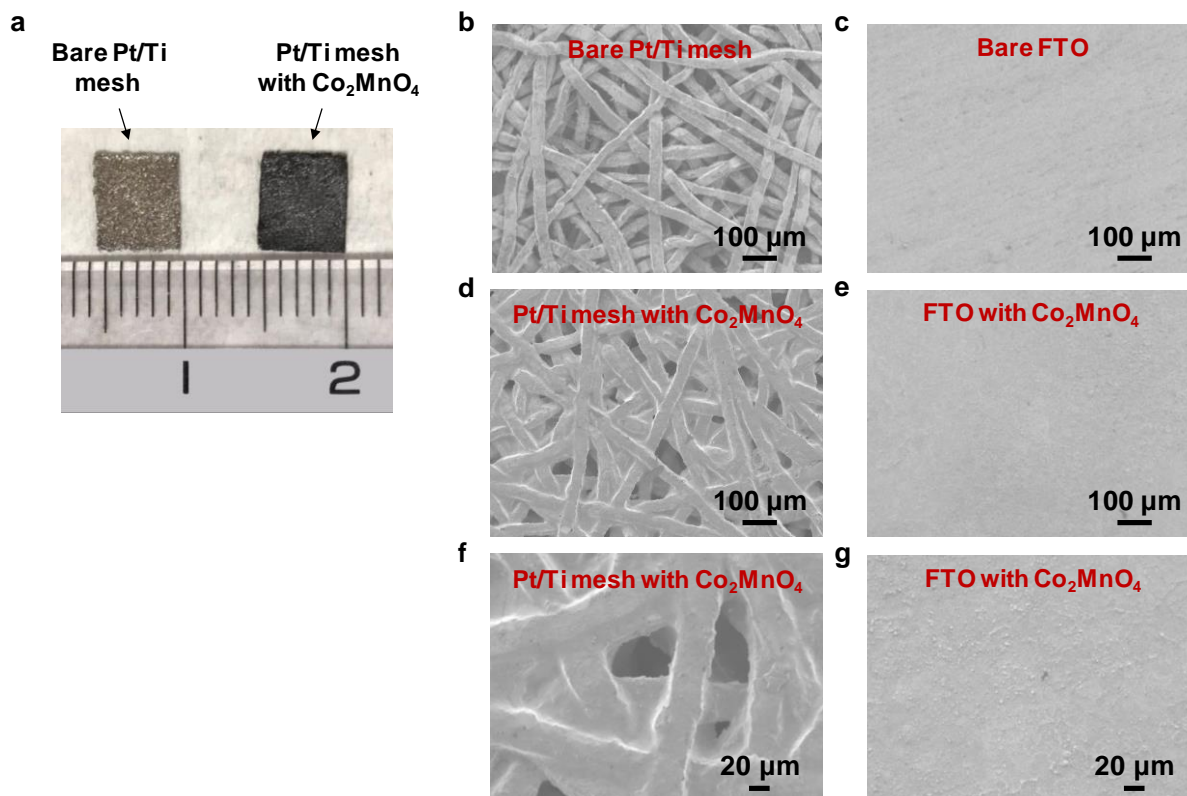

1  
2  
3  
4  
5  
6  
7  
8  
9  
10  
11

**Supplementary Figure 20. Images of electrodes with  $\text{Co}_2\text{MnO}_4$  on FTO and Pt/Ti mesh.**

**a**, Photos of the Pt/Ti mesh before and after deposition of  $\text{Co}_2\text{MnO}_4$ . The SEM images of Pt/Ti mesh and FTO, before and after deposition of  $\text{Co}_2\text{MnO}_4$  are shown in panels (b) to (g). The bare substrates are shown in (b) and (c). The images after deposition of  $\text{Co}_2\text{MnO}_4$  are shown in (d) and (e). Magnified images are shown in (f) and (g). Scale bars are shown in the figures. The electrochemical surface area (ECSA)<sup>12</sup> of  $\text{Co}_2\text{MnO}_4$  on Pt/Ti mesh was measured to be 8-10 times higher than that of  $\text{Co}_2\text{MnO}_4$  on FTO substrate per geometric area (Supplementary Figs. 21 and 22).

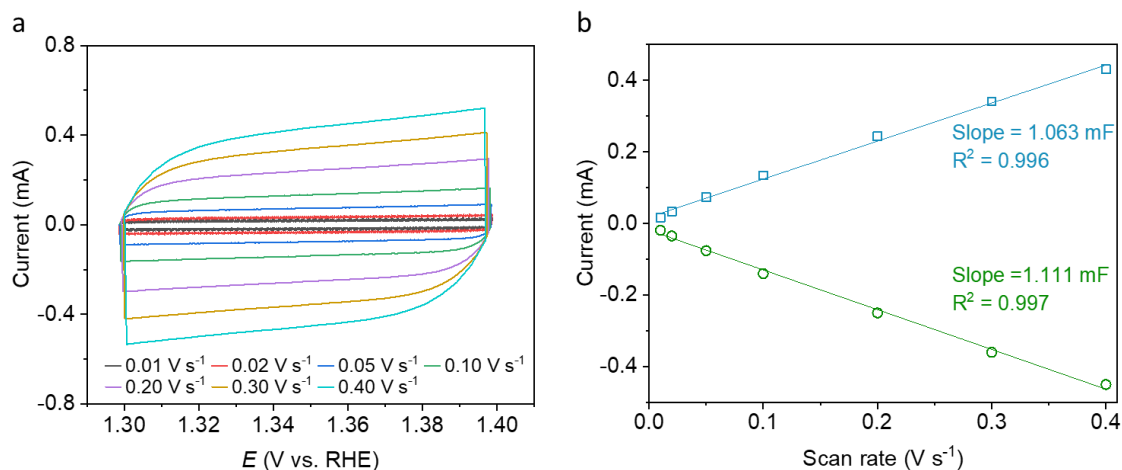

1

2 **Supplementary Figure 21. ECSA measurement of Co<sub>2</sub>MnO<sub>4</sub> on FTO.** Double-layer  
 3 capacitance measurements for determining the electrochemical surface area (ECSA)<sup>12</sup> of  
 4 Co<sub>2</sub>MnO<sub>4</sub> deposited on FTO in pH 0 H<sub>2</sub>SO<sub>4</sub> at 25 °C. **a**, Cyclic voltammograms were measured  
 5 in a non-Faradaic region of the voltammogram at the following scan rates: 0.01, 0.02, 0.05,  
 6 0.10, 0.20, 0.30, and 0.40 V s<sup>-1</sup>. The working electrode was held at each potential vertex for 10  
 7 s before beginning the next sweep. All currents were assumed to be due to capacitive charging.  
 8 **b**, The cathodic and anodic charging currents measured at 1.35 V vs. RHE plotted as a function  
 9 of scan rate. The potentials have not been *iR* corrected due to the low currents of the ECSA  
 10 measurements. The double-layer capacitance of the system is taken as the average of the  
 11 absolute value of the slope of the linear fits to the data. The ECSA of the catalyst can be  
 12 calculated by dividing double layer by the specific capacitance of Co (0.035 mF cm<sup>-2</sup>)<sup>12</sup>.

13

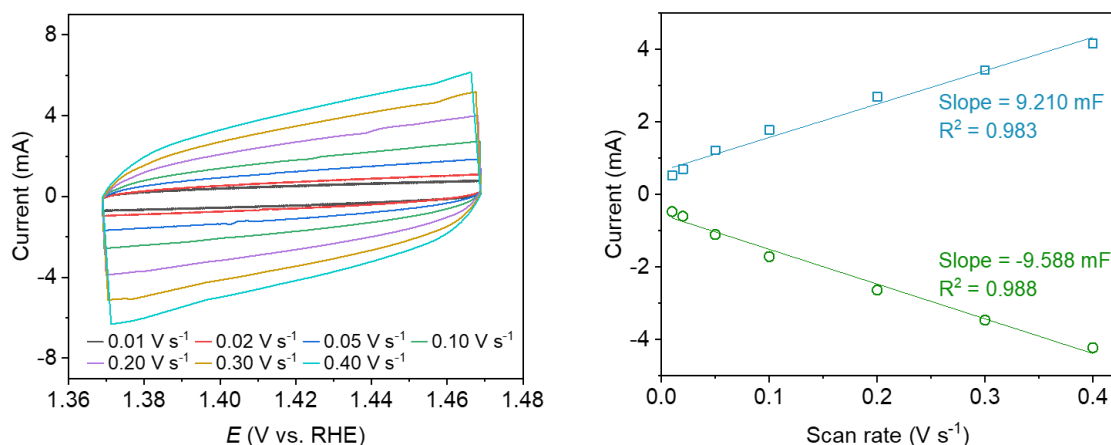

1  
2 **Supplementary Figure 22. ECSA measurement of Co<sub>2</sub>MnO<sub>4</sub> on Pt/Ti mesh.** Double-layer  
3 capacitance measurements for determining the ECSA<sup>12</sup> of Co<sub>2</sub>MnO<sub>4</sub> deposited on Pt/Ti mesh  
4 in pH 0 H<sub>2</sub>SO<sub>4</sub> at 25 °C. **a**, Cyclic voltammograms were measured in a non-Faradaic region of  
5 the voltammogram at the following scan rate: 0.01, 0.02, 0.05, 0.10, 0.20, 0.30, and 0.40 V s<sup>-1</sup>.  
6 The working electrode was held at each potential vertex for 10 s before beginning the next  
7 sweep. All currents were assumed to be due to capacitive charging. **b**, The cathodic and anodic  
8 charging currents measured at 1.42 V vs. RHE plotted as a function of scan rate. The potentials  
9 have not been *iR* corrected due to the low currents of the ECSA measurements. The double-  
10 layer capacitance of the system is taken as the average of the absolute value of the slope of the  
11 linear fits to the data. The ECSA of the catalyst can be calculated by dividing double layer by  
12 the specific capacitance of Co (0.035 mF cm<sup>-2</sup>)<sup>12</sup>.

13

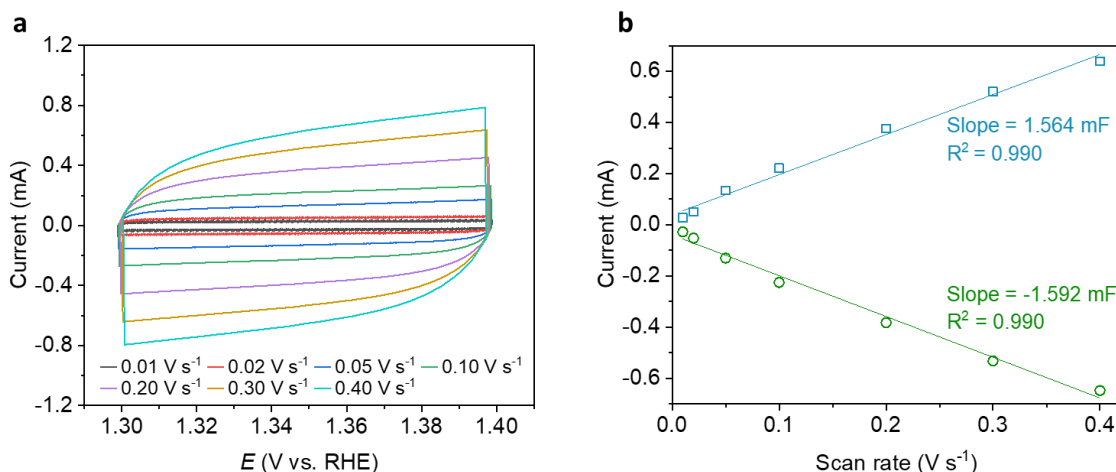

1

2 **Supplementary Figure 23. ECSA measurement of Co<sub>2</sub>MnO<sub>4</sub> on carbon plate.** Double-

3 layer capacitance measurements for determining the ECSA<sup>12</sup> of Co<sub>2</sub>MnO<sub>4</sub> deposited on carbon

4 plate in pH 0 H<sub>2</sub>SO<sub>4</sub> at 25 °C. **a**, Cyclic voltammograms were measured in a non-Faradaic

5 region of the voltammogram at the following scan rate: 0.01, 0.02, 0.05, 0.10, 0.20, 0.30, and

6 0.40 V s<sup>-1</sup>. The working electrode was held at each potential vertex for 10 s before beginning

7 the next sweep. All currents were assumed to be due to capacitive charging. **b**, The cathodic

8 and anodic charging currents measured at 1.35 V vs. RHE plotted as a function of scan rate.

9 The potentials have not been *iR* corrected due to the low currents of the ECSA measurements.

10 The double-layer capacitance of the system is taken as the average of the absolute value of the

11 slope of the linear fits to the data. The ECSA of the catalyst can be calculated by dividing

12 double layer by the specific capacitance of Co (0.035 mF cm<sup>-2</sup>)<sup>12</sup>.

13

14

15

16

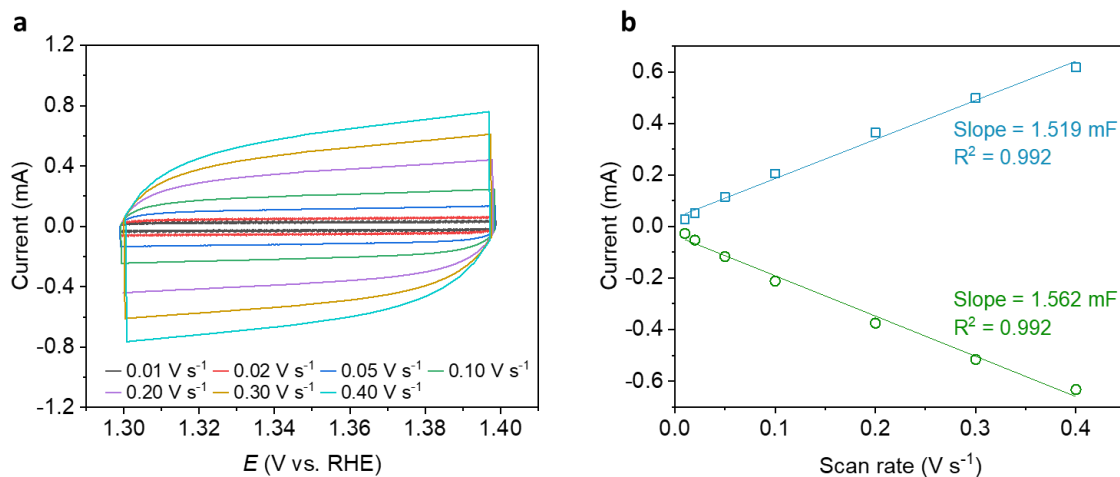

1

2 **Supplementary Figure 24. ECSA measurement of Co<sub>2</sub>MnO<sub>4</sub> on Pt/Ti plate.** Double-layer  
 3 capacitance measurements for determining the ECSA<sup>12</sup> of Co<sub>2</sub>MnO<sub>4</sub> deposited on Pt/Ti plate  
 4 in pH 0 H<sub>2</sub>SO<sub>4</sub> at 25 °C. **a**, Cyclic voltammograms were measured in a non-Faradaic region of  
 5 the voltammogram at the following scan rate: 0.01, 0.02, 0.05, 0.10, 0.20, 0.30, and 0.40 V s<sup>-1</sup>.  
 6 The working electrode was held at each potential vertex for 10 s before beginning the next  
 7 sweep. All currents are assumed to be due to capacitive charging. **b**, The cathodic and anodic  
 8 charging currents measured at 1.35 V vs. RHE plotted as a function of scan rate. The potentials  
 9 have not been *iR* corrected due to the low currents of the ECSA measurements. The double-  
 10 layer capacitance of the system is taken as the average of the absolute value of the slope of the  
 11 linear fits to the data. The ECSA of the catalyst can be calculated by dividing double layer by  
 12 the specific capacitance of Co (0.035 mF cm<sup>-2</sup>)<sup>12</sup>.

13

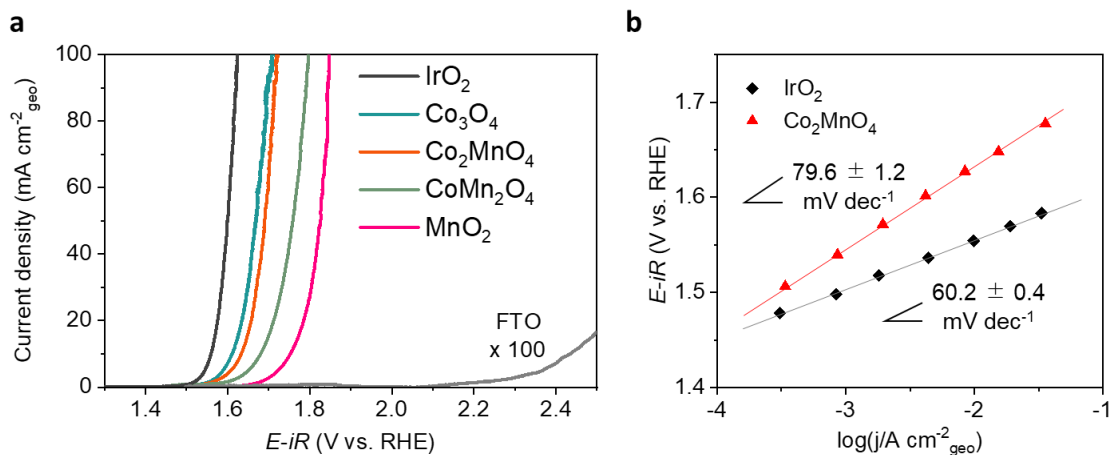

1  
 2 **Supplementary Figure 25. LSVs of Co<sub>3</sub>O<sub>4</sub>, Co<sub>2</sub>MnO<sub>4</sub>, CoMn<sub>2</sub>O<sub>4</sub>,  $\gamma$ -MnO<sub>2</sub> and IrO<sub>2</sub>.** a,  
 3 Linear sweep voltammograms of Co<sub>3</sub>O<sub>4</sub>, Co<sub>2</sub>MnO<sub>4</sub>, CoMn<sub>2</sub>O<sub>4</sub>,  $\gamma$ -MnO<sub>2</sub> and IrO<sub>2</sub> (Elyst Ir75  
 4 0480, metal purity 99.95%) deposited on FTO in pH 0 H<sub>2</sub>SO<sub>4</sub> at 25 °C. Geometric area, 0.28  
 5 cm<sup>2</sup>. Inset is the linear sweep voltammogram of a bare FTO substrate, magnified by 100 times.  
 6 **b,** Tafel plots of Co<sub>2</sub>MnO<sub>4</sub> and IrO<sub>2</sub>. Geometric area, 0.28 cm<sup>2</sup>.

7  
 8  
 9  
 10

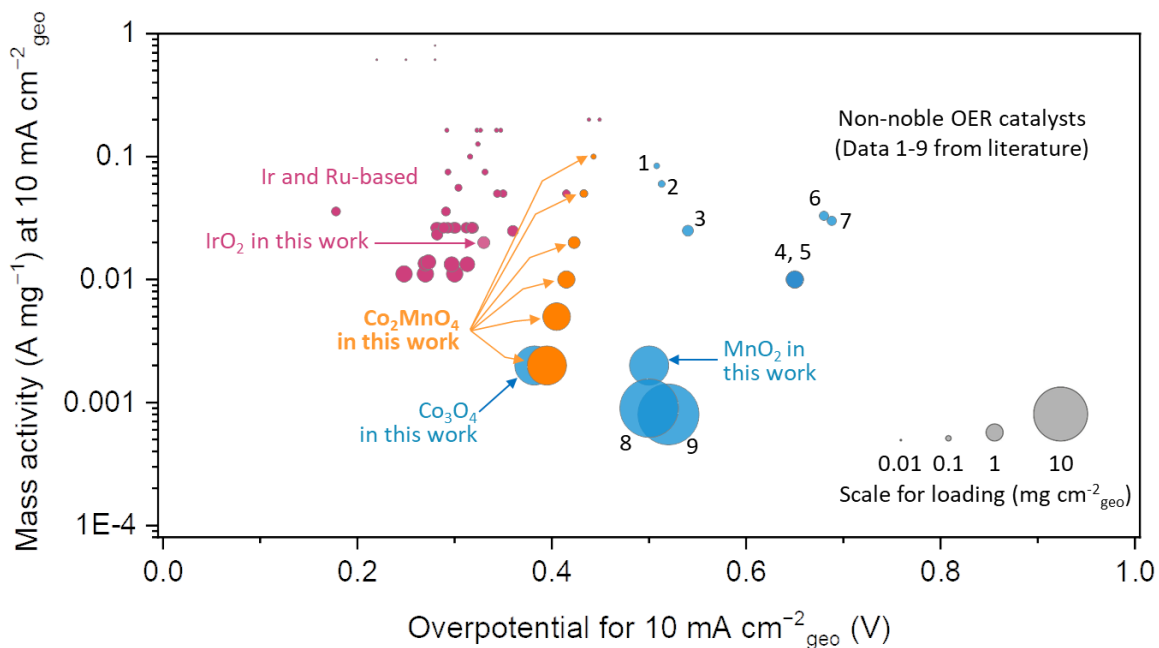

1  
 2 **Supplementary Figure 26. Comparisons of overpotential and mass activity with**  
 3 **literature.** The overpotential and the mass activity at  $10 \text{ mA cm}^{-2}_{\text{geo}}$  in acid for  $\text{Co}_2\text{MnO}_4$  on  
 4 FTO (orange), Ir- and Ru-based catalysts (pink), and non-noble OER catalysts in the literature  
 5 (blue). The figure has been adapted from *Nat. Energy* 2019, 4, 430. (ref. <sup>13</sup>). The areas of the  
 6 data points are proportional to the mass loading per  $\text{cm}^2_{\text{geo}}$ . Electrodes with  $\text{Co}_3\text{O}_4$ ,  $\gamma\text{-MnO}_2$ ,  
 7 and  $\text{IrO}_2$  (Elyst Ir75 0480, metal purity 99.95%) prepared in this work were also compared  
 8 here. For the numerical data and additional material information, see Supplementary Table 15  
 9 (Ir- and Ru-based OER catalysts) and Supplementary Table 16 (non-noble OER catalysts).

10  
 11

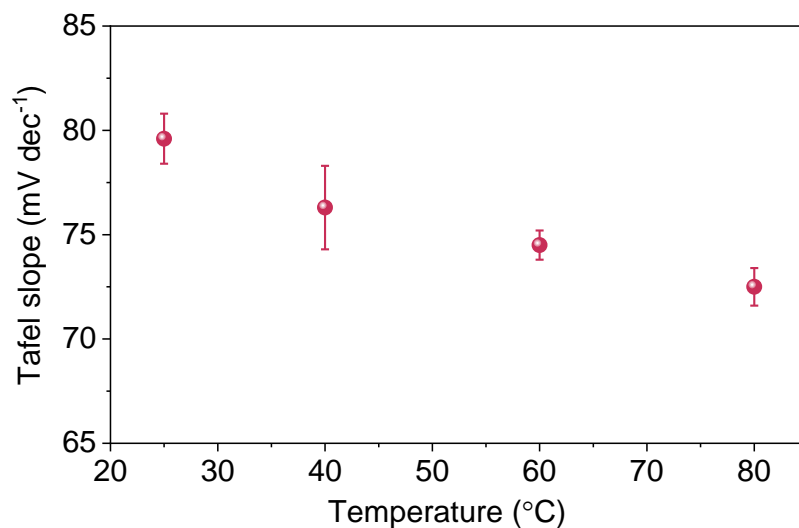

1  
2  
3  
4  
5  
6  
7  
8

**Supplementary Figure 27. Tafel slopes of Co<sub>2</sub>MnO<sub>4</sub> deposited on FTO.** Tafel slopes of Co<sub>2</sub>MnO<sub>4</sub> deposited on FTO, measured by chronopotentiometry in H<sub>2</sub>SO<sub>4</sub> (pH 0) at temperatures of 25, 40, 60, and 80 °C. Error bars indicate the standard deviation from four separate experiments.



1

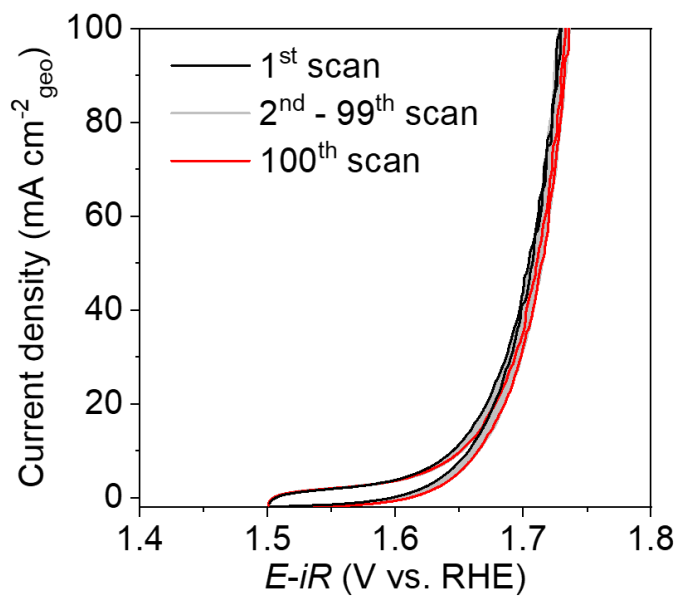

2

3 **Supplementary Figure 28. Cyclic voltammogram of Co<sub>2</sub>MnO<sub>4</sub> on FTO.** The scan rate was  
4 2 mV s<sup>-1</sup> and the potential range was 1.50 - 1.74 V vs. RHE after *iR* correction in H<sub>2</sub>SO<sub>4</sub> (pH  
5 0) at 25 °C.

6

7

8

1

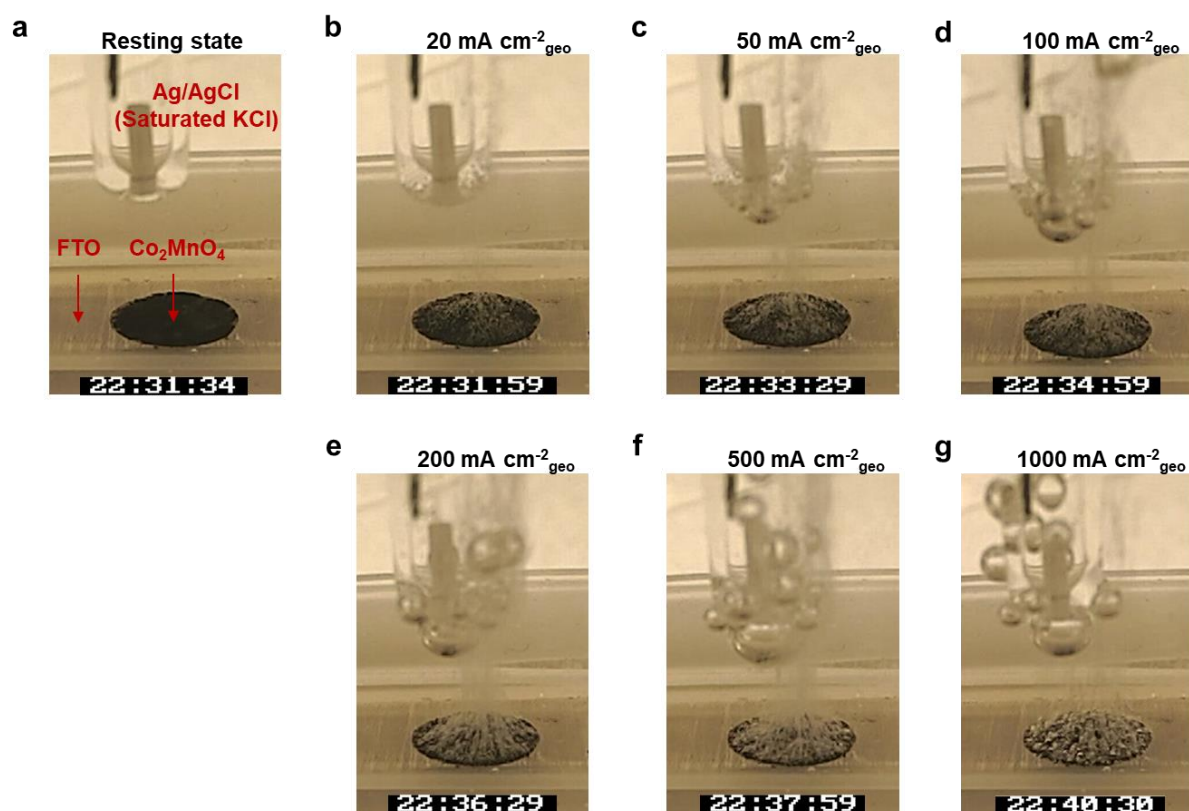

2

3

4 **Supplementary Figure 29. Photos of bubble generation on the  $\text{Co}_2\text{MnO}_4$  electrode.** Photos  
5 of the  $\text{Co}_2\text{MnO}_4$  electrode on FTO during OER in  $\text{H}_2\text{SO}_4$  (pH 0) at  $25^\circ\text{C}$ , showing the gas-  
6 bubble generation at the resting state (a) and after applying current densities of (b)  $20 \text{ mA cm}^{-2}_{\text{geo}}$ ,  
7  $20 \text{ mA cm}^{-2}_{\text{geo}}$ , (c)  $50 \text{ mA cm}^{-2}_{\text{geo}}$ , (d)  $100 \text{ mA cm}^{-2}_{\text{geo}}$ , (e)  $200 \text{ mA cm}^{-2}_{\text{geo}}$ , (f)  $500 \text{ mA cm}^{-2}_{\text{geo}}$ , and (g)  
8  $1000 \text{ mA cm}^{-2}_{\text{geo}}$ .

9

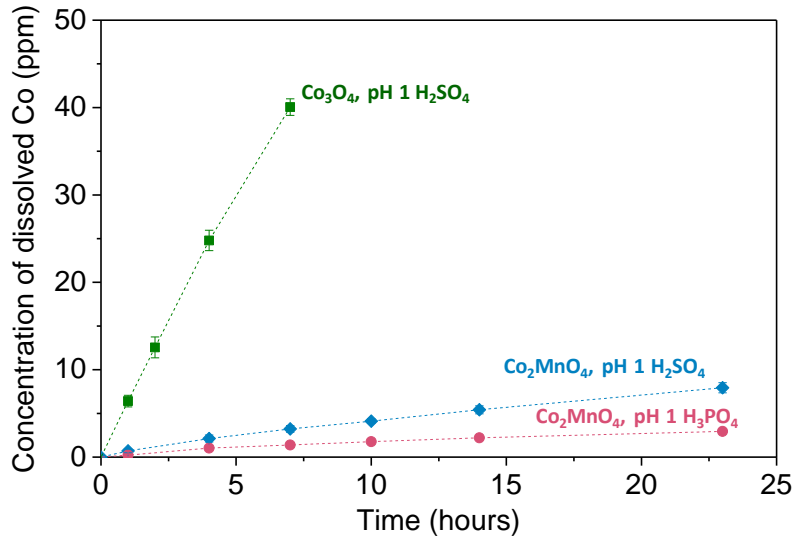

1

2 **Supplementary Figure 30. Time dependence of Co dissolution.** Time dependence of Co  
 3 dissolution during chronopotentiometric (CP) experiments on Co<sub>3</sub>O<sub>4</sub> and Co<sub>2</sub>MnO<sub>4</sub> at 100 mA  
 4 cm<sup>-2</sup><sub>geo</sub>. FTO was used as the substrate. The dissolution rate of Co<sub>2</sub>MnO<sub>4</sub> is 10 times lower  
 5 when compared to that of Co<sub>3</sub>O<sub>4</sub> in pH 1 H<sub>2</sub>SO<sub>4</sub> at 25 °C. Changing the electrolyte to pH 1  
 6 H<sub>3</sub>PO<sub>4</sub> further decreases the dissolution rate by over 60%. The stability number<sup>14</sup> (S-number)  
 7 was calculated to be 70, 3600 and 16000 ( $n_{\text{oxygen}}/n_{\text{cobalt}}$ ) for Co<sub>3</sub>O<sub>4</sub> (pH 1 H<sub>2</sub>SO<sub>4</sub>, 100 mA cm<sup>-2</sup>  
 8 <sub>geo</sub> for 7 hours), Co<sub>2</sub>MnO<sub>4</sub> (pH 1 H<sub>2</sub>SO<sub>4</sub>, 100 mA cm<sup>-2</sup><sub>geo</sub> for 330 hours) and Co<sub>2</sub>MnO<sub>4</sub> (pH 1  
 9 H<sub>3</sub>PO<sub>4</sub>, 100 mA cm<sup>-2</sup><sub>geo</sub> for 1400 hours), respectively. The difference in electrolyte must also  
 10 be considered, as phosphate is well known to suppress Co dissolution<sup>15</sup>. Using ICP-MS, we  
 11 observe Co leaching is 60 % slower in phosphate compared to sulfate, which leads to a  
 12 discrepancy in the lifetime depending on the electrolysis condition.

13

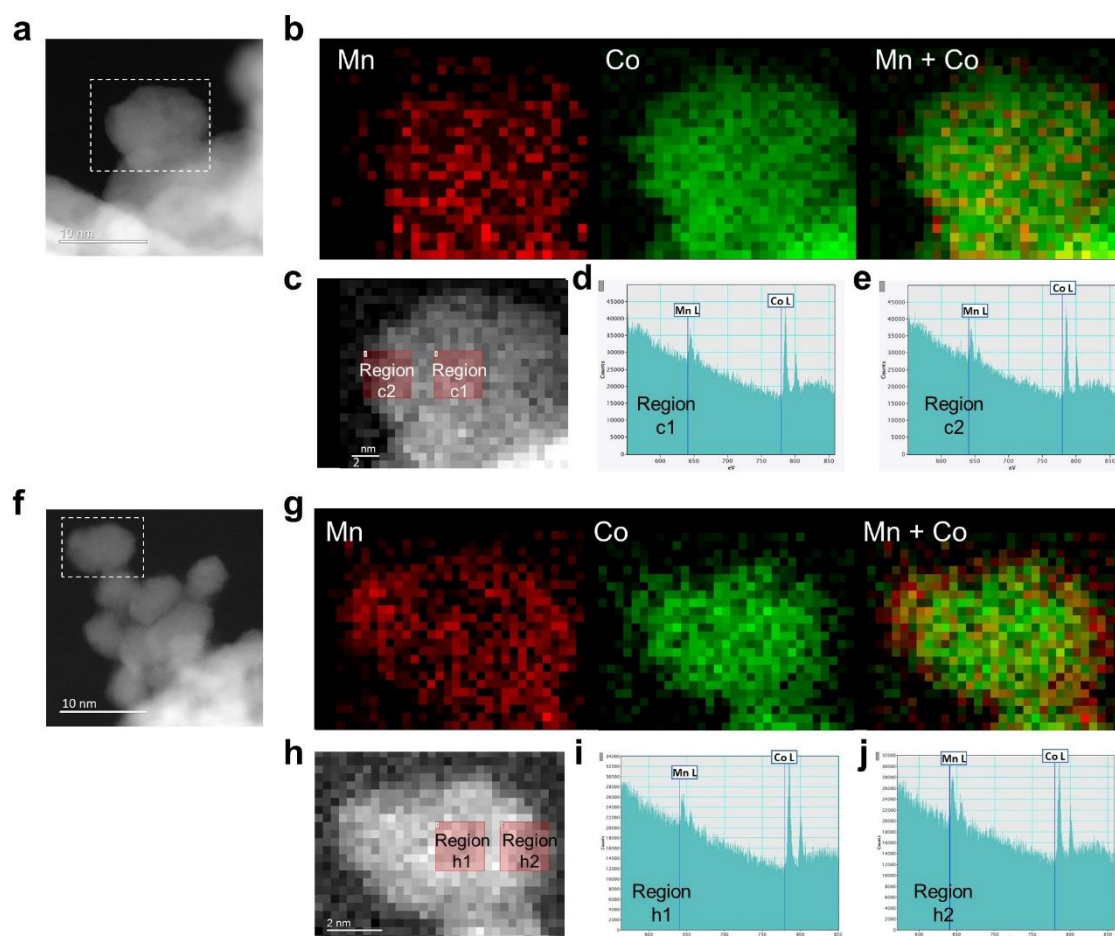

1  
2 **Supplementary Figure 31. STEM-EELS analysis of  $\text{Co}_2\text{MnO}_4$  before and after**  
3 **electrolysis at  $100 \text{ mA cm}^{-2}_{\text{geo}}$  for 23 hours in  $\text{H}_2\text{SO}_4$  (pH 1) at  $25 \text{ }^\circ\text{C}$ . STEM-EELS**  
4 **elementary analysis of  $\text{Co}_2\text{MnO}_4$  before (a-e) and after (f-j) electrolysis at  $100 \text{ mA cm}^{-2}_{\text{geo}}$  for**  
5 **23 hours in  $\text{H}_2\text{SO}_4$  (pH 1) at  $25 \text{ }^\circ\text{C}$ . (a) and (f) show the High-Angle Annular Dark Field**  
6 **Scanning (HAADF)-STEM images. The region surrounded by the dashed lines were used for**  
7 **the EELS elementary mapping in (b) and (g). Mn and Co are shown in red and green,**  
8 **respectively, for all images. EELS spectra of Mn L-edge and Co L-edge for the sample before**  
9 **and after electrolysis were shown in (c, d, e) and (h, i, j), respectively. The spectra were taken**  
10 **from the core and surface regions of nanoparticles (region c1, c2 and region h1, h2). Elemental**  
11 **mapping of the as-synthesized  $\text{Co}_2\text{MnO}_4$  nanoparticles showed that Co and Mn are uniformly**  
12 **distributed. The Co/Mn ratios estimated by Mn L-edge and Co L-edge spectra were 2.0:1 in**  
13 **both the core (region c1) and near surface (region c2) regions of the nanoparticle (error**  
14 **estimated from spectral signal is 5~10 %). After electrolysis however, the distribution of Co**  
15 **and Mn in the nanoparticles became less uniform, due to the formation of Mn-rich regions near**  
16 **the surface. Namely, the Co/Mn ratio in the core part of the nanoparticles (region f1) is 1.9:1,**  
17 **while it is 1.5:1 in the region closer to the surfaces (region f2). The formation of Mn-rich**  
18 **regions at the surface is consistent with our ICP and DFT calculations, showing that Co is**  
19 **dissolved preferentially compared to Mn.**

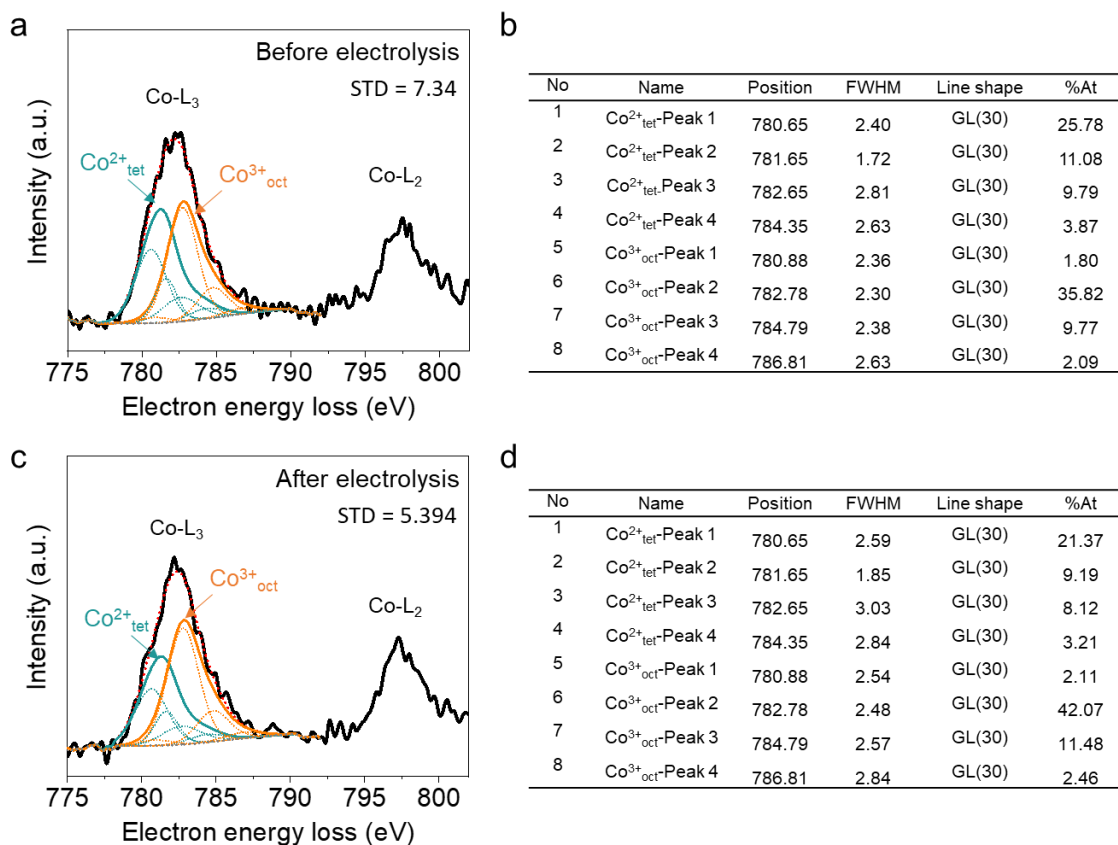

1

2 **Supplementary Figure 32. Co L<sub>3</sub> edge fitting before and after electrolysis.** Co L<sub>3</sub> edge  
 3 fitting in the edge regions of Co<sub>2</sub>MnO<sub>4</sub> before (a, b) and after electrolysis at 100 mA cm<sup>-2</sup><sub>geo</sub> for  
 4 23 hours (c, d). The spectra were fitted by considering tetrahedral Co<sup>2+</sup> (Co<sup>2+</sup><sub>tet</sub>) and octahedral  
 5 Co<sup>3+</sup> (Co<sup>3+</sup><sub>oct</sub>), reproduced from the literature<sup>16</sup>. The full width at half maximum (FWHM) was  
 6 not fixed, although other parameters such as peak position and line ships were fixed during the  
 7 spectra fitting.

8

9

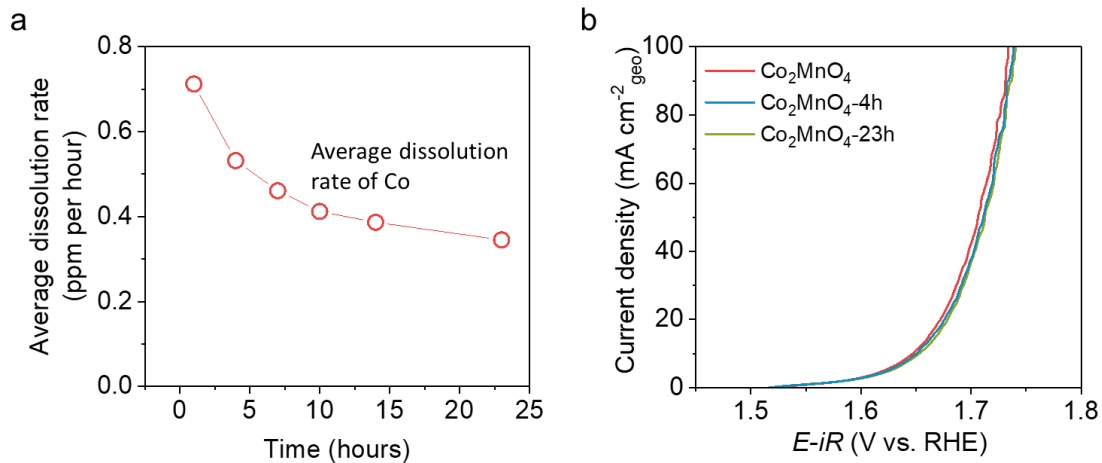

1  
2  
3  
4  
5  
6  
7  
8  
9

**Supplementary Figure 33. LSVs of Co<sub>2</sub>MnO<sub>4</sub> after electrolysis for 4 hours and 23 hours.**

**a**, Dissolution rate of Co during CP experiments on Co<sub>2</sub>MnO<sub>4</sub> at 100 mA cm<sup>-2</sup><sub>geo</sub>. The average dissolution rate is calculated by dividing the total dissolution by the operation time in Supplementary Fig. 30. **b**, Linear sweep voltammograms of Co<sub>2</sub>MnO<sub>4</sub> deposited on FTO before (red) and after electrolysis (blue, green) in H<sub>2</sub>SO<sub>4</sub> (pH 0) at 25 °C. Geometric area, 0.28 cm<sup>2</sup>. Electrolysis was conducted in H<sub>2</sub>SO<sub>4</sub> (pH 0) at 25 °C for 4 hours (blue) and 23 hours (green).



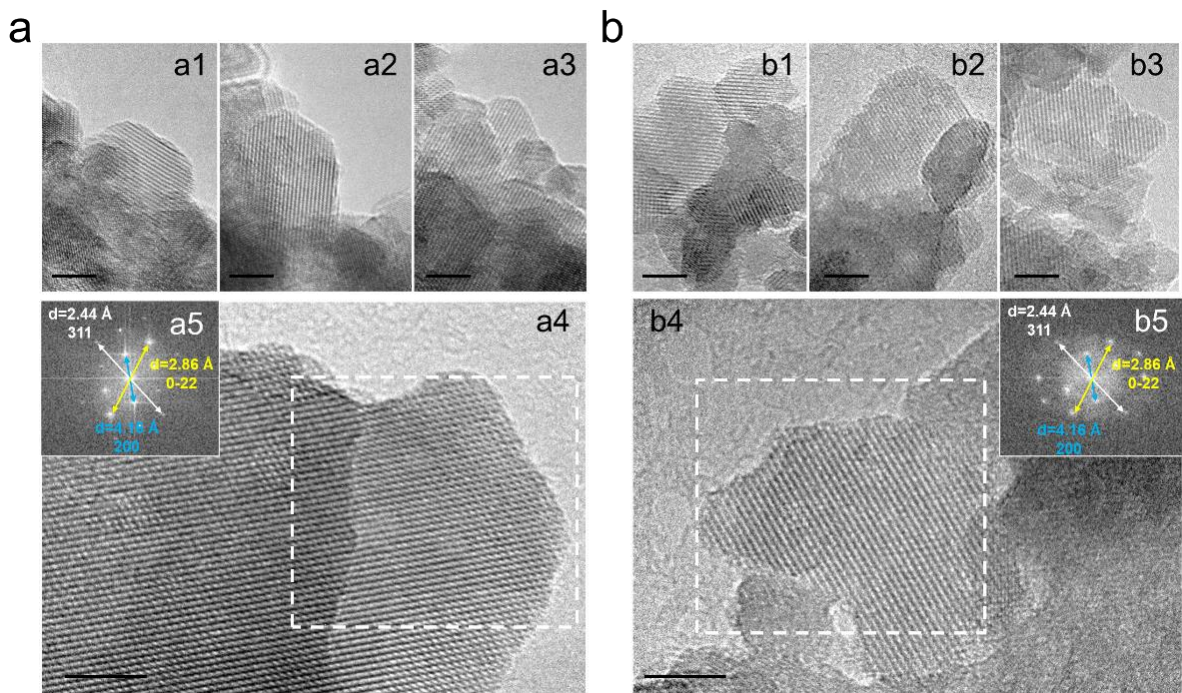

1  
2 **Supplementary Figure 34. HRTEM images of  $\text{Co}_2\text{MnO}_4$  before and after electrolysis at**  
3  **$100 \text{ mA cm}^{-2}_{\text{geo}}$  for 23 hours in  $\text{H}_2\text{SO}_4$  (pH 1) at  $25^\circ\text{C}$ .** HRTEM images of  $\text{Co}_2\text{MnO}_4$  before  
4 (a) and after electrolysis at  $100 \text{ mA cm}^{-2}_{\text{geo}}$  for 23 hours in  $\text{H}_2\text{SO}_4$  (pH 1) at  $25^\circ\text{C}$  (b). Multiple  
5 images are presented, with low (a1-3 and b1-3) and high (a4 and b4) magnifications. Scale bar,  
6 5 nm. The FFT patterns shown in (a5 and b5) were obtained from the framed area in a4 and  
7 b4. There was no clear change in the surface structures of the nanoparticles, confirming that  
8 neither amorphization nor new crystalline phase formation proceeds at the catalyst surface  
9 during electrolysis. Namely, the continuous lattice fringes extending through the whole  
10 nanoparticles were maintained even after electrolysis. Additionally, the lattice spacing of 4.16  
11 Å, 2.86 Å and 2.44 Å, which corresponds to the (200), (220) and (311) planes of spinel-type  
12  $\text{Co}_2\text{MnO}_4$ , respectively, were also retained after electrolysis.

13  
14  
15

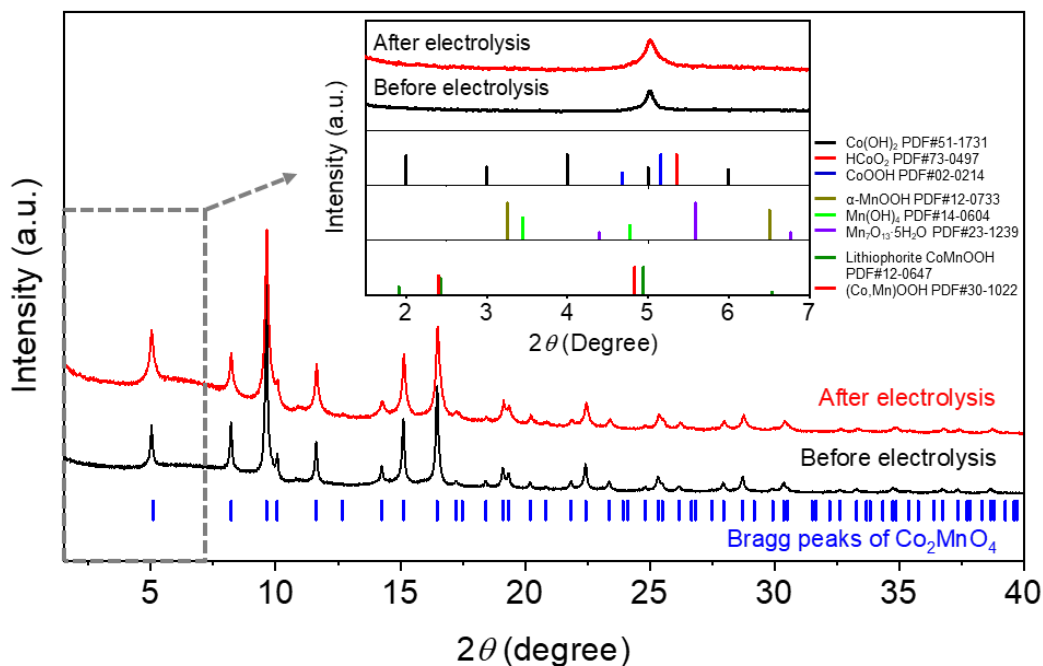

1  
2  
3  
4  
5  
6  
7  
8  
9

**Supplementary Figure 35. SR-PXRD patterns of  $\text{Co}_2\text{MnO}_4$  before and after electrolysis.** SR-PXRD patterns of  $\text{Co}_2\text{MnO}_4$  before and after electrolysis at  $100 \text{ mA cm}^{-2}_{\text{geo}}$  for 23 hours in pH 1  $\text{H}_2\text{SO}_4$  at  $25 \text{ }^\circ\text{C}$ , corresponding Rietveld refinement results are shown in Supplementary Figs. 1 and 3, respectively. The SR-PXRD patterns between  $1.5 - 7^\circ$  are enlarged in the inset. Bragg peaks of  $\text{Co}_2\text{MnO}_4$  and the powder diffraction file (PDF) cards for representative Co- and Mn- based (oxy)hydroxides are also presented for comparison.



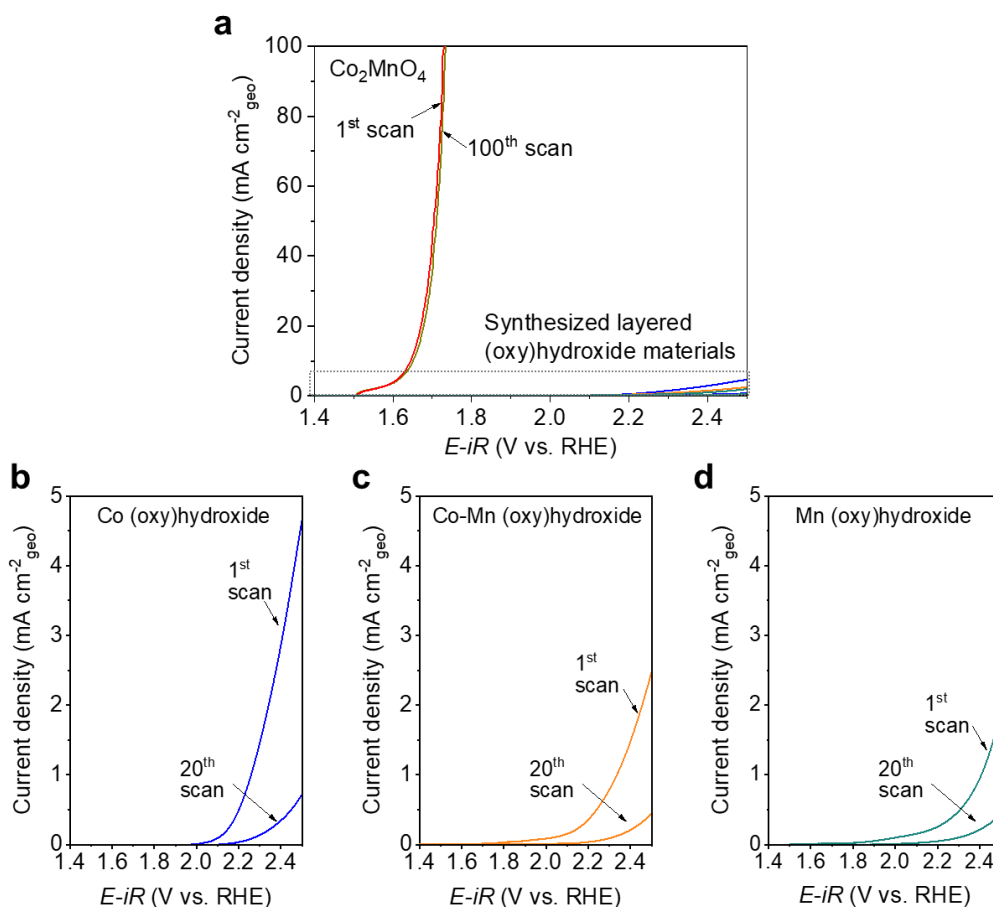

1  
 2 **Supplementary Figure 36. OER performance of (oxy)hydroxides in acid.** a, LSVs showing  
 3 the activity and stability of Co<sub>2</sub>MnO<sub>4</sub>, cobalt (oxy)hydroxides, manganese (oxy)hydroxides  
 4 and cobalt-manganese (oxy)hydroxides deposited on FTO in pH 0 H<sub>2</sub>SO<sub>4</sub> at 25 °C. The LSVs  
 5 of (oxy)hydroxides materials are enlarged in (b, c, d). The (oxy)hydroxides materials were  
 6 electrodeposited on FTO based on the previously reported procedures<sup>17,18</sup>. The Pourbaix  
 7 diagram shows that Co/Mn oxyhydroxides are stable under alkaline conditions, but unstable  
 8 under strong acidic conditions, and therefore, their formation during our electrolysis  
 9 experiments in acid is unlikely. Therefore, we believe that the spinel-type Co<sub>2</sub>MnO<sub>4</sub> is the  
 10 actual catalyst, and not a pre-catalyst for the formation of layered oxyhydroxides.

11

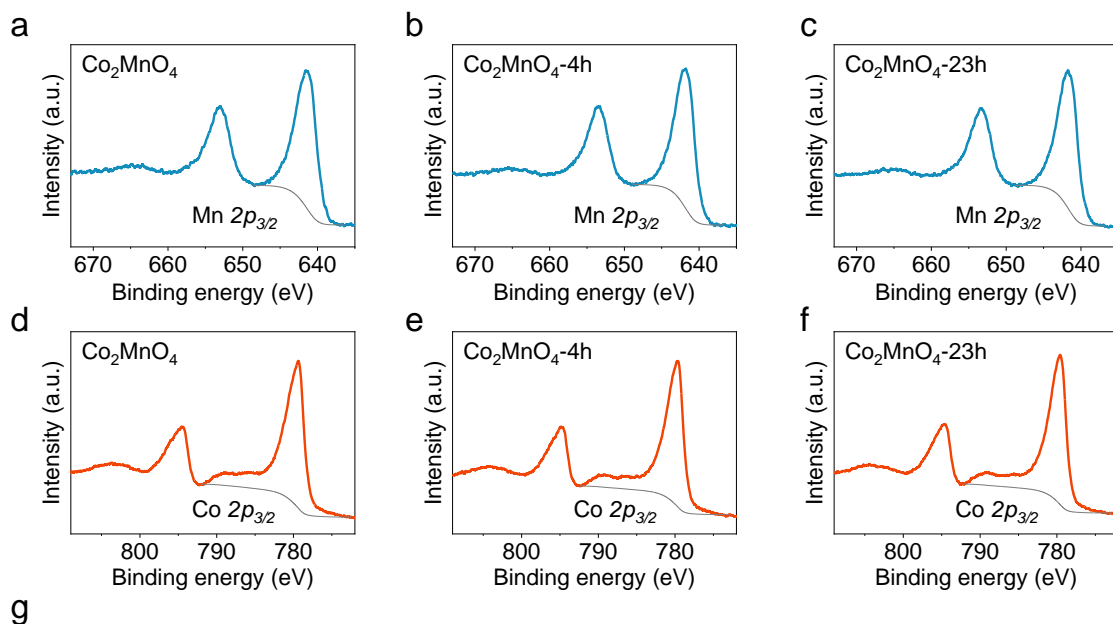

g

| Samples                               | Peak Area of Co 2p <sub>3/2</sub> | Sensitivity factor of Co 2p <sub>3/2</sub> | Peak area of Mn 2p <sub>3/2</sub> | Sensitivity factor of Mn 2p <sub>3/2</sub> | Co:Mn atomic ratio |
|---------------------------------------|-----------------------------------|--------------------------------------------|-----------------------------------|--------------------------------------------|--------------------|
| Co <sub>2</sub> MnO <sub>4</sub>      | 498.75                            | 2.5                                        | 166.40                            | 1.7                                        | 2.04:1             |
| Co <sub>2</sub> MnO <sub>4</sub> -4h  | 554.50                            | 2.5                                        | 206.95                            | 1.7                                        | 1.82: 1            |
| Co <sub>2</sub> MnO <sub>4</sub> -23h | 579.35                            | 2.5                                        | 224.70                            | 1.7                                        | 1.75: 1            |

1  
2  
3  
4  
5  
6  
7  
8  
9  
10  
11

**Supplementary Figure 37. XPS quantitative analysis of Co<sub>2</sub>MnO<sub>4</sub> before and after electrolysis.** XPS spectra of Mn2p (a-c) and Co2p (d-f) in Co<sub>2</sub>MnO<sub>4</sub> before electrolysis (Co<sub>2</sub>MnO<sub>4</sub>) and Co<sub>2</sub>MnO<sub>4</sub> after electrolysis at 100 mA cm<sup>-2</sup><sub>geo</sub> for 4 hours (Co<sub>2</sub>MnO<sub>4</sub>-4h) and 23 hours (Co<sub>2</sub>MnO<sub>4</sub>-23h). (pH 1 H<sub>2</sub>SO<sub>4</sub>, 25 °C). The Co:Mn atom ratios determined by XPS were presented in (g), following the fitting procedure of Wagner et al.<sup>19</sup>. The ratio of Co:Mn on the surface was estimated to change from 2.04:1 to 1.75:1 during the first 23 hours of electrolysis at 100 mA cm<sup>-2</sup><sub>geo</sub>. The decrease in the surface Co:Mn ratio is consistent with the ICP-MS measurements which indicate Co leaching, and implies the formation of a Mn-rich surface after electrolysis.

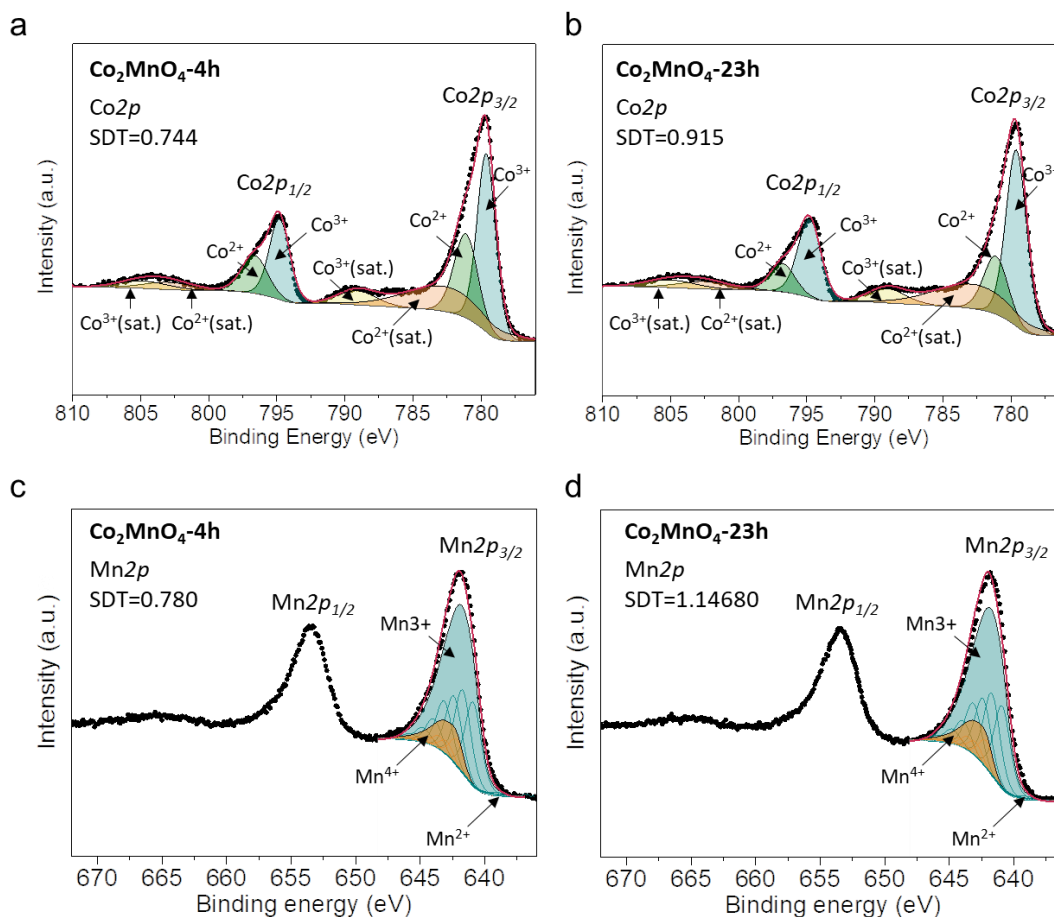

1  
2 **Supplementary Figure 38. XPS fitting of  $\text{Co}_2\text{MnO}_4$  after electrolysis.** XPS spectra fitting  
3 of  $\text{Co}2p$  (a, b) and  $\text{Mn}2p$  (c, d) in  $\text{Co}_2\text{MnO}_4$  after electrolysis at  $100 \text{ mA cm}^{-2}_{\text{geo}}$  for 4 hours  
4 ( $\text{Co}_2\text{MnO}_4\text{-4h}$ ) and 23 hours ( $\text{Co}_2\text{MnO}_4\text{-23h}$ ). The spectra were fitted by considering  $\text{Co}^{2+}$  (refs.  
5 <sup>5,6</sup>),  $\text{Co}^{3+}$  (ref. <sup>7</sup>) and shakeup satellites for  $\text{Co}2p$ , and  $\text{Mn}^{2+}$ ,  $\text{Mn}^{3+}$  and  $\text{Mn}^{4+}$  (ref.<sup>8</sup>) for  $\text{Mn}2p$ .  
6 All high-resolution spectra were collected using a pass energy of 23.5 eV and calibrated using  
7 the  $\text{Cl}1s$  peak at 284.6 eV. The spectral fitting parameters are presented in the Supplementary  
8 Tables 9 and 10 ( $\text{Co}2p$ ), Supplementary Tables 12 and 13 ( $\text{Mn}2p$ ).

9  
10  
11  
12

# 1 Evaluation of Catalyst Lifetime

2

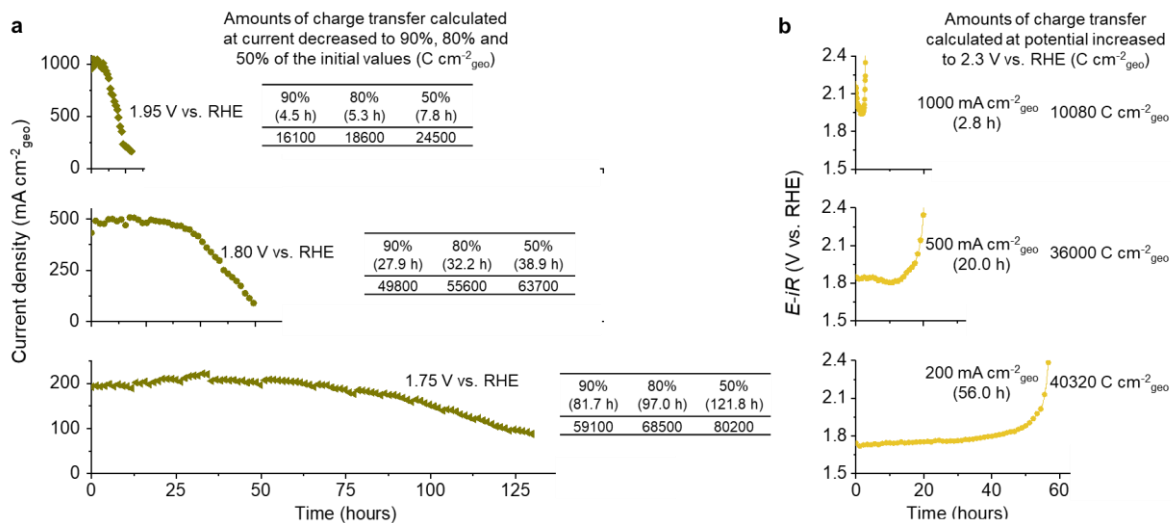

3

4

5 **Supplementary Figure 39. CA measurements of  $\text{Co}_2\text{MnO}_4$  on FTO. a,** Chronoamperometry  
 6 (CA) measurements of  $\text{Co}_2\text{MnO}_4$  on FTO in  $\text{H}_2\text{SO}_4$  (pH 1) at 25 °C. The applied potentials  
 7 were 1.95 V, 1.80 V and 1.75 V vs. RHE after  $iR$  correction. The total amount of charge  
 8 transferred at each potential was calculated when the current densities decreased to 90%, 80%  
 9 and 50% of the initial values as shown in the inset. **b,** CP measurements of  $\text{Co}_2\text{MnO}_4$  on FTO  
 10 in  $\text{H}_2\text{SO}_4$  (pH 1, at 25 °C) at 1000  $\text{mA cm}^{-2}_{\text{geo}}$ , 500  $\text{mA cm}^{-2}_{\text{geo}}$  and 200  $\text{mA cm}^{-2}_{\text{geo}}$ . The total  
 11 amount of charge transferred was calculated when the potential exceeded 2.3 V vs. RHE after  
 12  $iR$  correction.

13

1

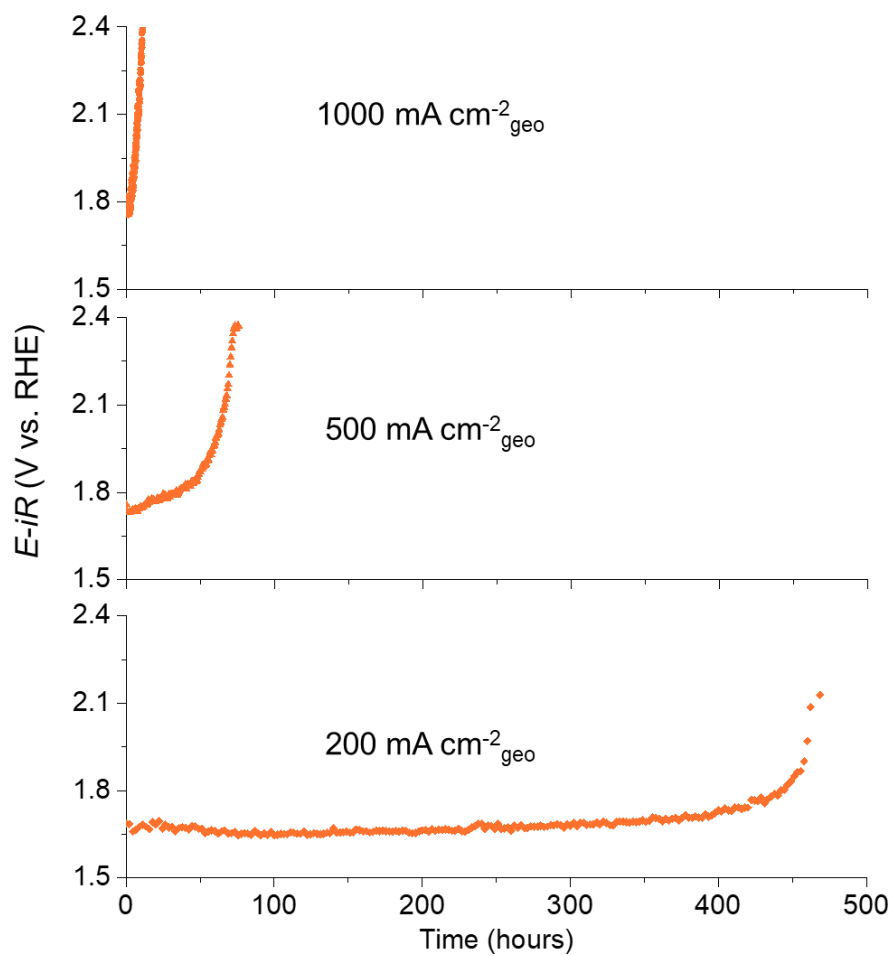

2

3 **Supplementary Figure 40. CP measurements of  $\text{Co}_2\text{MnO}_4$  on Pt/Ti mesh in  $\text{H}_2\text{SO}_4$ . CP**  
4 **measurements of  $\text{Co}_2\text{MnO}_4$  on Pt/Ti mesh at current densities of  $1000 \text{ mA cm}^{-2}_{\text{geo}}$ ,  $500 \text{ mA cm}^{-2}_{\text{geo}}$**   
5 **and  $200 \text{ mA cm}^{-2}_{\text{geo}}$  in  $\text{H}_2\text{SO}_4$  (pH 1, at  $25 \text{ }^\circ\text{C}$ ). Potentials are corrected for ohmic losses.**

6

7

1

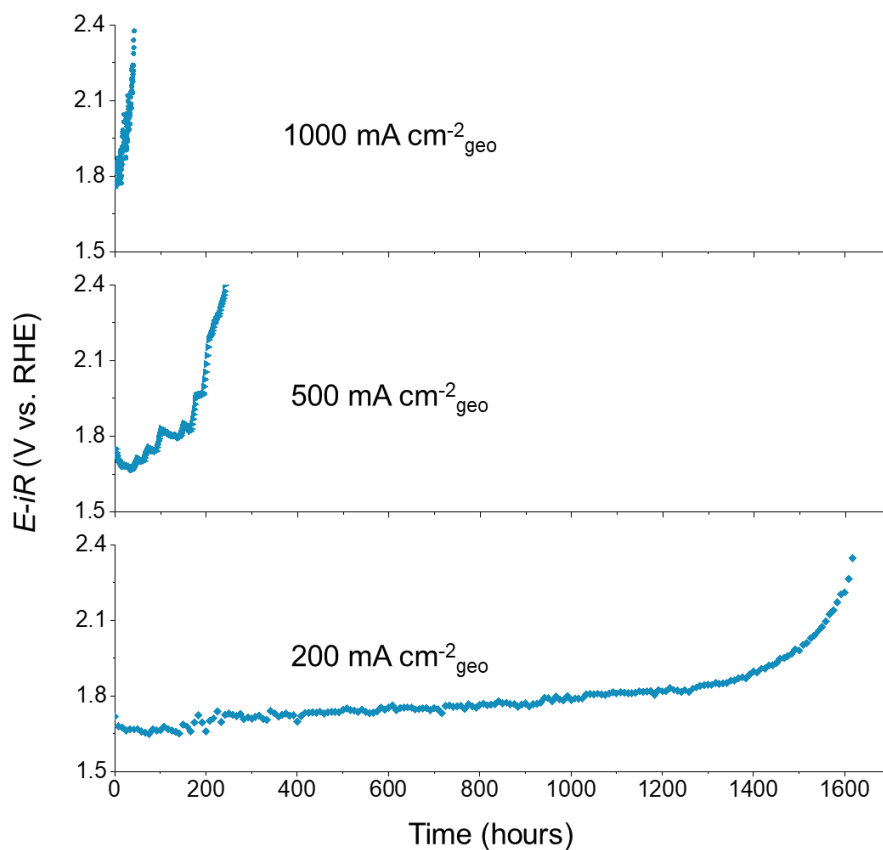

2

3

4 **Supplementary Figure 41. CP measurements of  $\text{Co}_2\text{MnO}_4$  on Pt/Ti mesh in  $\text{H}_3\text{PO}_4$ . CP**  
5 **measurements of  $\text{Co}_2\text{MnO}_4$  on Pt/Ti mesh at current densities of  $1000 \text{ mA cm}^{-2}_{\text{geo}}$ ,  $500 \text{ mA cm}^{-2}_{\text{geo}}$**   
6 **and  $200 \text{ mA cm}^{-2}_{\text{geo}}$  in  $\text{H}_3\text{PO}_4$  (pH 1, at  $25^\circ\text{C}$ ). Potentials have been corrected for ohmic**  
7 **losses.**

8

9

10

1

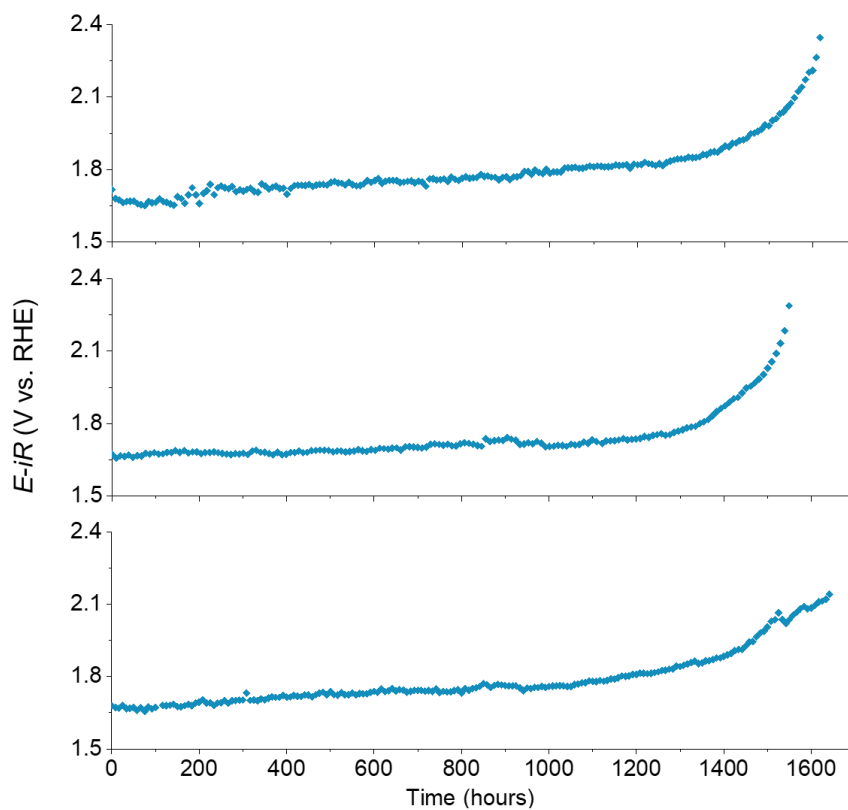

2

3

4

5

6

7

8

9

**Supplementary Figure 42. Repeated CP measurements at 200 mA cm<sup>-2</sup><sub>geo</sub>.** Three individual CP measurements of Co<sub>2</sub>MnO<sub>4</sub> on Pt/Ti mesh at 200 mA cm<sup>-2</sup><sub>geo</sub> in H<sub>3</sub>PO<sub>4</sub> (pH 1, at 25 °C). All measurements indicate electrolysis can be performed for about 1500 hours, indicating high reproducibility. Potentials are corrected for ohmic losses.

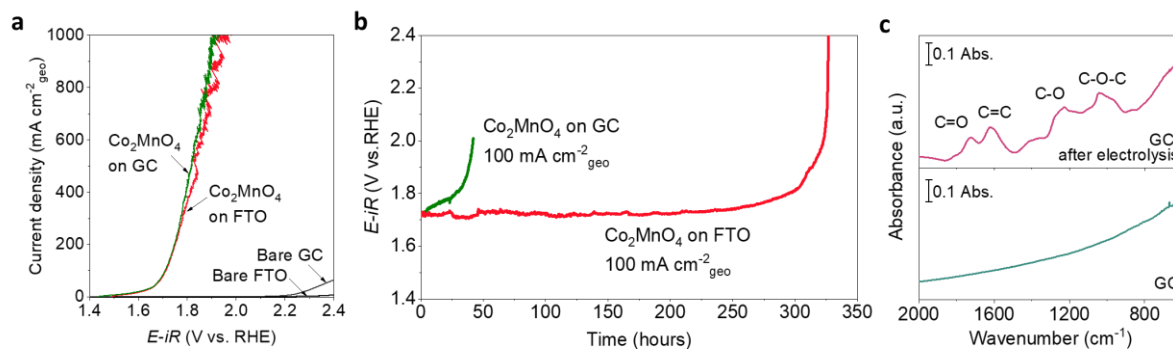

1  
2 **Supplementary Figure 43. OER comparison of  $\text{Co}_2\text{MnO}_4$  on FTO and glassy carbon.**  
3 LSVs of  $\text{Co}_2\text{MnO}_4$  on glassy carbon (GC) and FTO, as well as bare glassy carbon and FTO  
4 after  $iR$  correction. The electrolyte was  $\text{H}_2\text{SO}_4$  (pH 0) at  $25^\circ\text{C}$ . Scan rate,  $10 \text{ mV s}^{-1}$ . **b**, The  
5 long-term stability of  $\text{Co}_2\text{MnO}_4$  on glassy carbon and FTO at  $100 \text{ mA cm}^{-2}_{\text{geo}}$  in pH 1  $\text{H}_2\text{SO}_4$   
6 at  $25^\circ\text{C}$ . **c**, ATR-FTIR spectrum of glassy carbon before and after electrolysis at 1.7 V vs.  
7 RHE after  $iR$  correction for 1 hour. ATR-FTIR measurements were performed on PerkinElmer  
8 Spotlight 400 equipped with a liquid nitrogen-cooled MCT detector and an ATR accessory.  
9



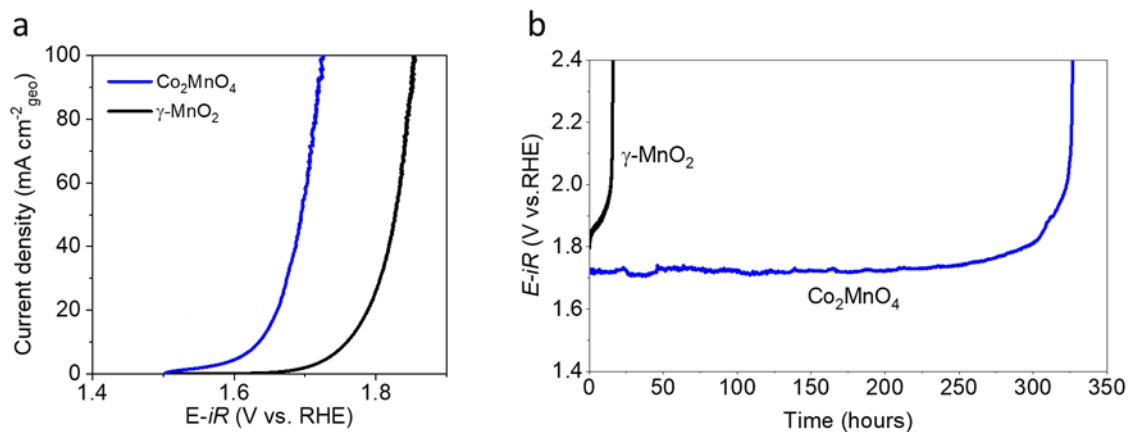

1

2 **Supplementary Figure 44. OER comparison between  $\text{Co}_2\text{MnO}_4$  and  $\text{MnO}_2$ .** LSVs of  
 3  $\text{Co}_2\text{MnO}_4$  and  $\gamma\text{-MnO}_2$  on FTO with the same amount of Mn loading ( $2.3 \text{ mg}_{\text{Mn}} \text{ cm}^{-2}_{\text{geo}}$ ) in pH  
 4 0  $\text{H}_2\text{SO}_4$  at  $25^\circ\text{C}$ . **b**, The long-term stability of  $\text{Co}_2\text{MnO}_4$  and  $\gamma\text{-MnO}_2$  on FTO at  $100 \text{ mA cm}^{-2}_{\text{geo}}$   
 5  $^2$  in pH 1  $\text{H}_2\text{SO}_4$  at  $25^\circ\text{C}$ .

6

7

8

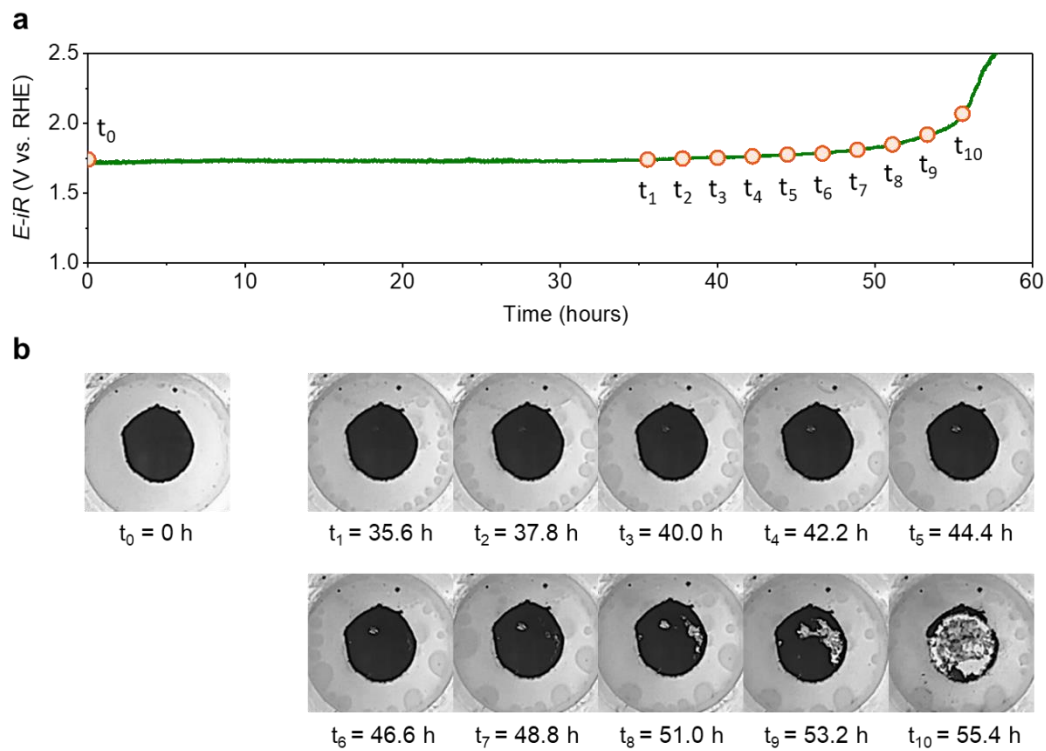

1  
2  
3  
4  
5  
6  
7  
8  
9

**Supplementary Figure 45. Time course of catalyst detachment during electrolysis. a,** Chronopotentiometry at  $200 \text{ mA cm}^{-2}_{\text{geo}}$  with  $\text{Co}_2\text{MnO}_4$  on FTO substrate at  $25 \text{ }^\circ\text{C}$  in pH 1  $\text{H}_2\text{SO}_4$ . **b,** Photographs showing how the appearance of the electrode changes over time. Photographs were obtained at  $t_0 = 0$  h,  $t_1 = 35.6$  h,  $t_2 = 37.8$  h,  $t_3 = 40.0$  h,  $t_4 = 42.2$  h,  $t_5 = 44.4$  h,  $t_6 = 46.6$  h,  $t_7 = 48.8$  h,  $t_8 = 51.0$  h,  $t_9 = 53.2$  h and  $t_{10} = 55.4$  h. The time stamps are the same as in (a), and show how large particles of the catalyst are detached from the surface with time.

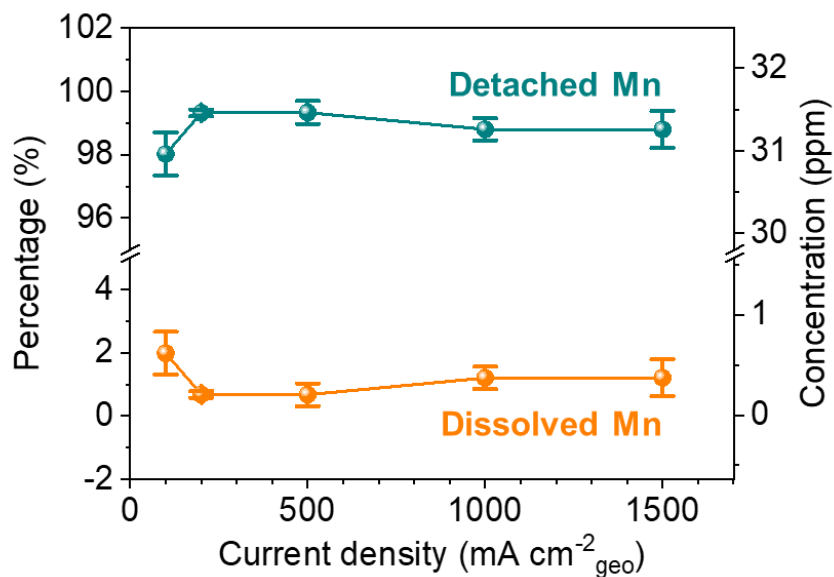

1  
 2 **Supplementary Figure 46. ICP-MS quantification of Mn detachment and dissolution.** The  
 3 percentage (left Y-axis) and concentration (right Y-axis) of Mn which was detached in solid  
 4 form or dissolved from the catalyst after electrolysis in H<sub>2</sub>SO<sub>4</sub> (pH 1). The X axis indicates the  
 5 current density at which electrolysis was performed, and quantification was performed using  
 6 ICP-MS only after the catalyst was fully deactivated.  
 7

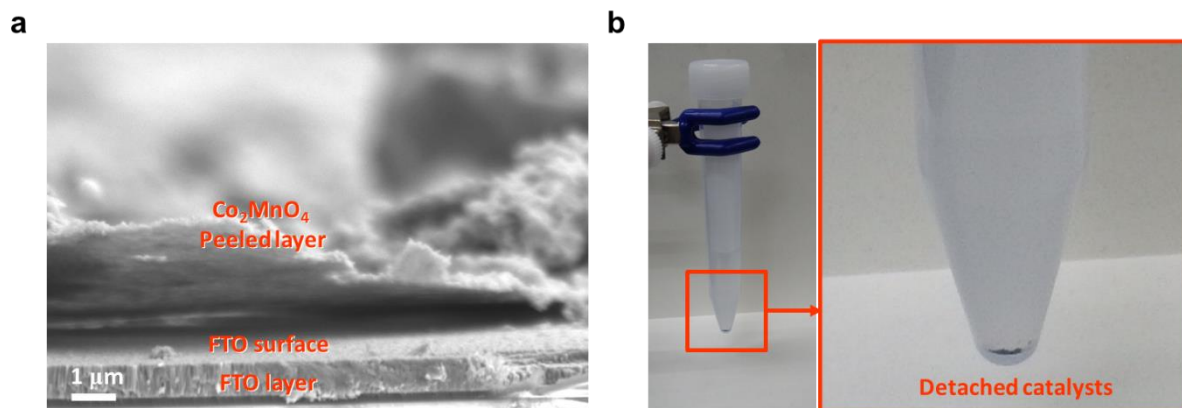

1  
2 **Supplementary Figure 47. SEM observation of catalyst detachment.** **a**, Cross-sectional  
3 SEM image of the electrode on FTO after electrolysis at  $200 \text{ mA cm}^{-2}_{\text{geo}}$  for 50 hours (pH 1  
4  $\text{H}_2\text{SO}_4$ ,  $25 \text{ }^\circ\text{C}$ ). A large void between the surface of the FTO substrate and the  $\text{Co}_2\text{MnO}_4$  can  
5 be observed, suggesting the catalyst is detached due to the mechanical stress. Scale bar,  $1 \text{ } \mu\text{m}$ .  
6 **b**, Catalyst particles released into the electrolyte after the same electrolysis conditions,  
7 collected by centrifugation.

8  
9  
10

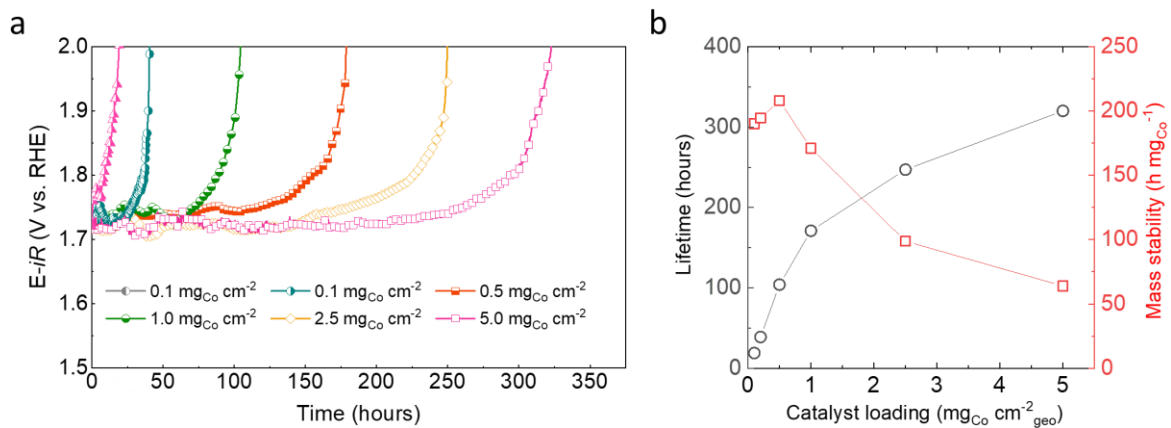

1  
 2 **Supplementary Figure 48. Mass dependent stability measurements. a,**  
 3 **Chronopotentiometry measurements of  $\text{Co}_2\text{MnO}_4$  on FTO at  $100 \text{ mA cm}^{-2}_{\text{geo}}$  in  $\text{H}_2\text{SO}_4$  (pH 1,**  
 4  **$25 \text{ }^\circ\text{C}$ ) with different catalyst loading (0.1, 0.2, 0.5, 1.0, 2.5 and  $5.0 \text{ mg}_{\text{Co}} \text{ cm}^{-2}_{\text{geo}}$ ).** **b, The**  
 5 **lifetime and mass stability (lifetime divided by catalyst loading) plotted versus loading amount,**  
 6 **measured at  $100 \text{ mA cm}^{-2}_{\text{geo}}$  in  $\text{H}_2\text{SO}_4$  (pH 1,  $25 \text{ }^\circ\text{C}$ ).**

7

# 1 DFT Calculation

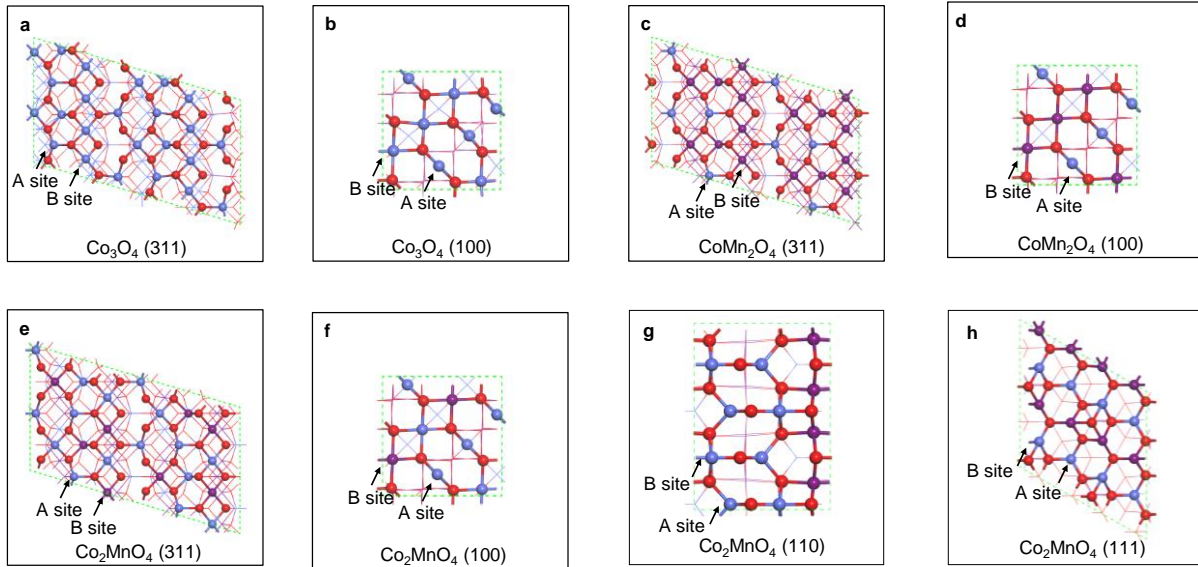

2  
3 **Supplementary Figure 49. Surface structures of  $\text{Co}_3\text{O}_4$ ,  $\text{CoMn}_2\text{O}_4$  and  $\text{Co}_2\text{MnO}_4$ .** (311)  
4 and (100) surface structures of  $\text{Co}_3\text{O}_4$  (**a, b**) and  $\text{CoMn}_2\text{O}_4$  (**c, d**). (311), (100), (110) and (111)  
5 surface structures of  $\text{Co}_2\text{MnO}_4$  (**e - h**). Monkhorst-Pack k-points of  $1 \times 2 \times 1$  was applied for  
6 (311) surfaces, and  $4 \times 4 \times 1$  was applied for spinel (100), (111) and (110) surfaces, respectively.  
7 The blue, purple and red atoms refer to Co, Mn and O, respectively. The arrows labeled by A  
8 and B site present the tetrahedral and octahedral site in spinel structures, respectively. In  
9  $\text{CoMn}_2\text{O}_4$ , A site and B site were considered to be occupied by Co and Mn respectively. All A  
10 site metals and half of the B site metals were considered to be Co in  $\text{Co}_2\text{MnO}_4$ . In  $\text{Co}_2\text{MnO}_4$ ,  
11 the (311) surface shows the lowest surface formation energy ( $140 \text{ meV}/\text{\AA}^2$ ), followed by the  
12 (100) surface ( $171 \text{ meV}/\text{\AA}^2$ ), (011) surface ( $196 \text{ meV}/\text{\AA}^2$ ). In addition, the lowest cleavage  
13 energy for oxygen-terminated (111) surfaces is  $247 \text{ meV}/\text{\AA}^2$ .

14  
15

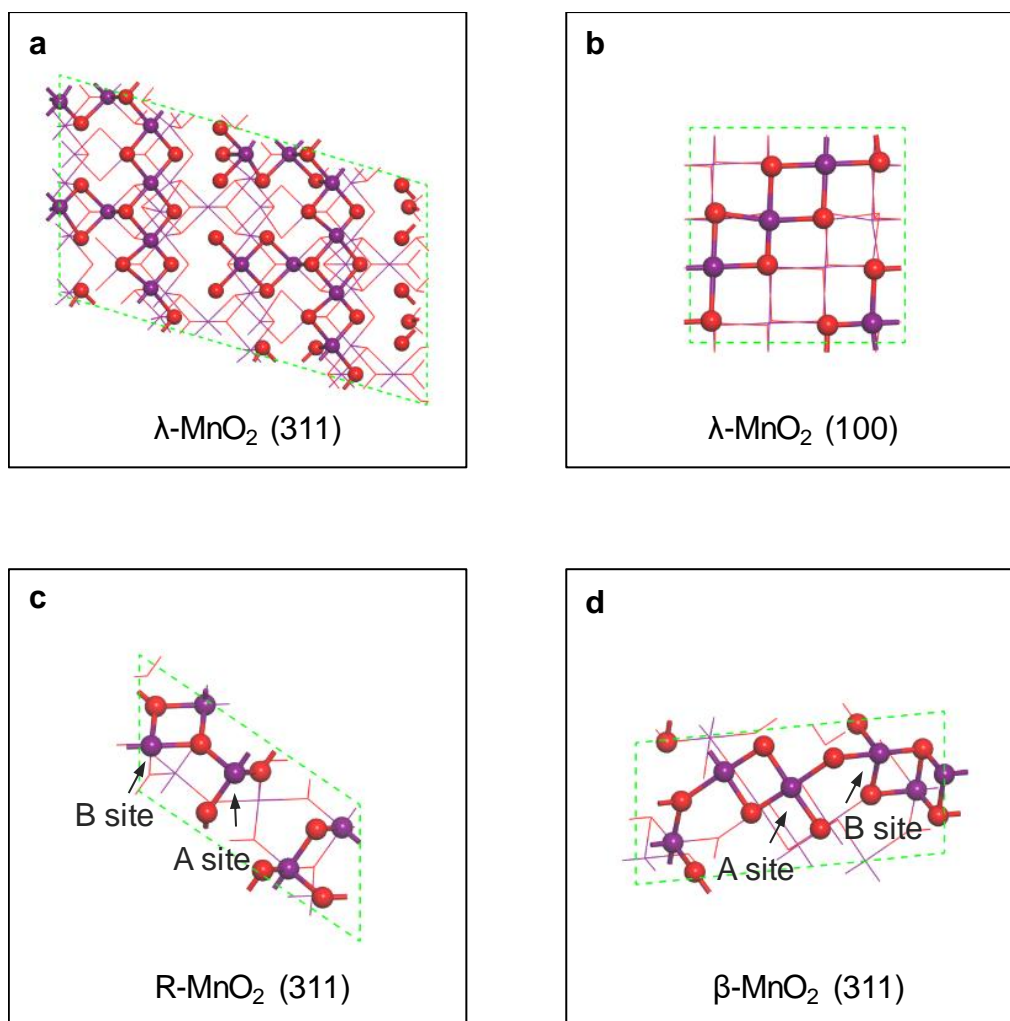

1  
 2 **Supplementary Figure 50. Surface structures of  $\lambda\text{-MnO}_2$ ,  $\beta\text{-MnO}_2$  and  $\text{R-MnO}_2$ .** (311) and  
 3 (100) surface structures of  $\lambda\text{-MnO}_2$  (**a, b**).  $\lambda\text{-MnO}_2$  was constructed based on the structure of  
 4 spinel size  $\text{Mn}_3\text{O}_4$ , where all A site Mn atoms were removed. (311) surface structure of R-  
 5  $\text{MnO}_2$  (**c**) and  $\beta\text{-MnO}_2$  (**d**) calculated separately with Monkhorst-Pack k-points of  $2\times 5\times 1$  and  
 6  $2\times 4\times 1$ , respectively. A and B sites refer to the surface Mn with different O coordination  
 7 number. The purple and red atoms refer to Mn and O, respectively.

8  
 9  
 10  
 11  
 12

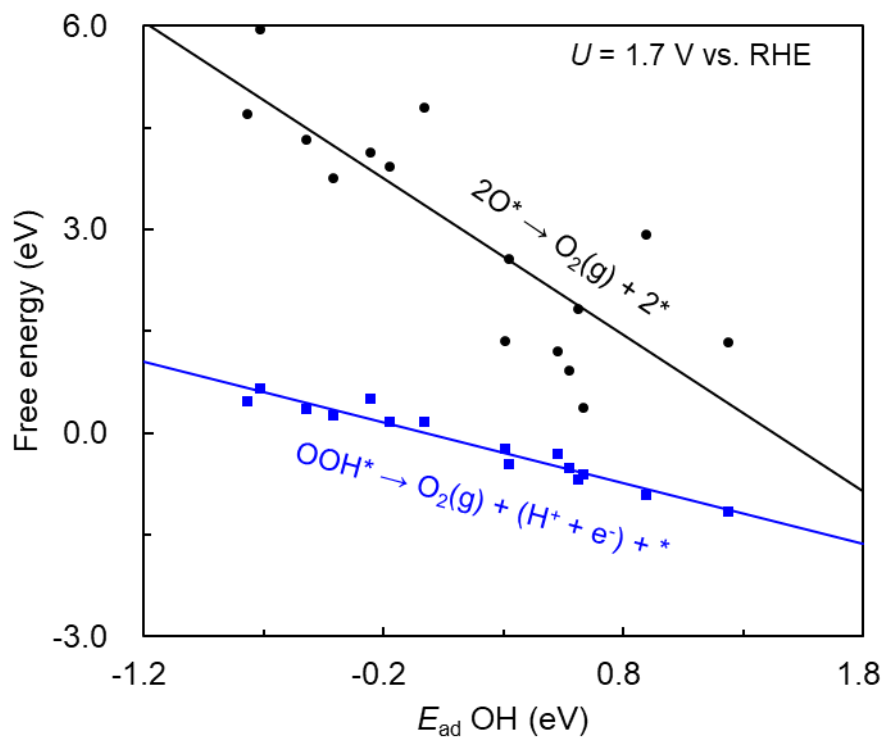

1  
2  
3  
4  
5  
6  
7  
8

**Supplementary Figure 51. A comparison between two O-O bond formation pathways.** Reaction free energy comparison between two different O-O bond formation pathways in OER: O\*-O\* coupling and OOH\* deprotonation at 1.7 V vs. RHE. OOH\* deprotonation is more favorable than O\*-O\* direct coupling.



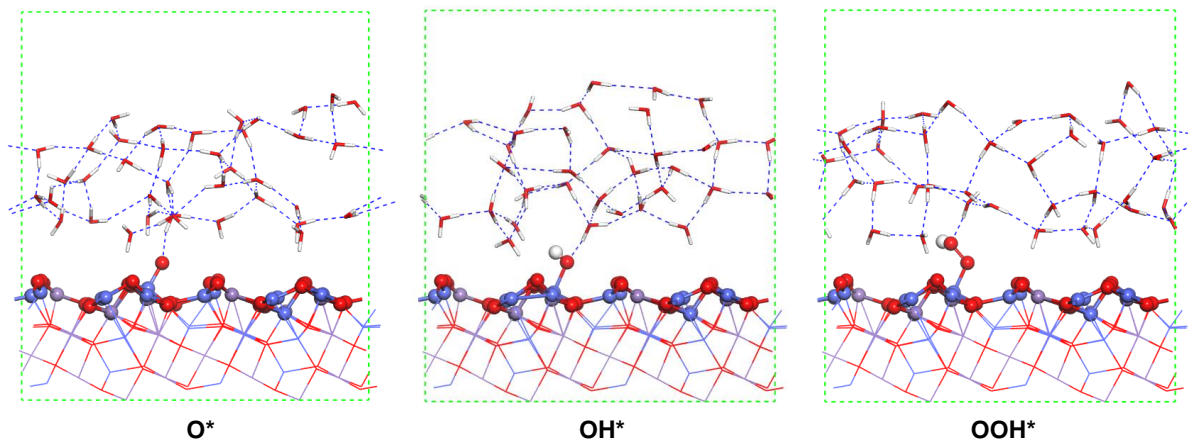

1

2 **Supplementary Figure 52. Structures for solvent effect calculations.** Four layers of water  
3 were applied on  $\text{Co}_2\text{MnO}_4$  (311) surfaces. The calculations are based on explicit models.

4

5

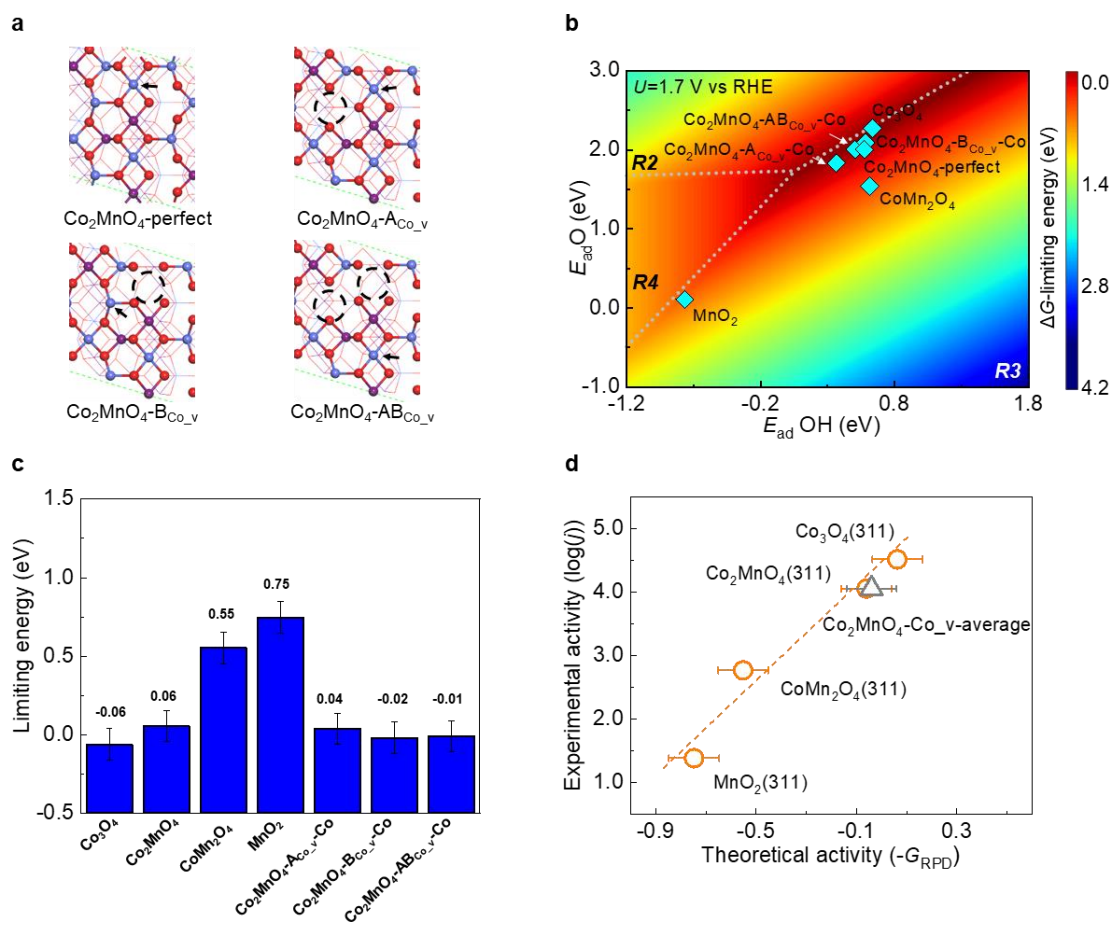

1  
 2 **Supplementary Figure 53. Comparison of activity on Co-deficient (Mn-rich) surfaces of**  
 3 **Co<sub>2</sub>MnO<sub>4</sub>.** **a**, The local structures of the Co<sub>2</sub>MnO<sub>4</sub> surfaces with Co vacancies in DFT  
 4 calculations. The dashed circles describe the location of the Co vacancies (1 vacancy among  
 5 the 12 Co sites within the unit cell, see Supplementary Figure 54). In order to assess the  
 6 influence of vacancies on the activity, calculations were performed assuming that the Co site  
 7 nearest to the vacancy is the active site (black arrows). For details of the structure, see  
 8 Supplementary Table 21. **b**, Two-dimensional activity map showing the OER activity on  
 9 different Mn-rich surfaces. **c**, ΔG-limiting energies for Co<sub>3</sub>O<sub>4</sub>, Co<sub>2</sub>MnO<sub>4</sub>, CoMn<sub>2</sub>O<sub>4</sub>, MnO<sub>2</sub> and  
 10 different Mn-rich surfaces of Co<sub>2</sub>MnO<sub>4</sub>. The limiting energies were calculated following  $\Delta G_{\text{lim}}$   
 11  $= \max(\Delta G_1, \Delta G_2, \Delta G_3, \Delta G_4)$ , where  $G_1 - G_4$  refers to the reaction free energies of relevant  
 12 elementary steps (see equations (1)-(4) in main text). Committing to a comparison with the  
 13 limiting energies from the original calculations, the binding energies of O\* and OH\* were  
 14 calculated explicitly, while the OOH\* adsorption energies were obtained from the scaling  
 15 relation vs. OH\* (**Fig. 5a** in main text). **d**, The correlation between experimental activities  
 16 (log(j)) and theoretical ones (-ΔG<sub>lim</sub>) derived from the ΔG-limiting energies. The triangle shows  
 17 the theoretical result based on the average of all calculated limiting energies of Co-deficient  
 18 Co<sub>2</sub>MnO<sub>4</sub> surfaces shown in (a).

19

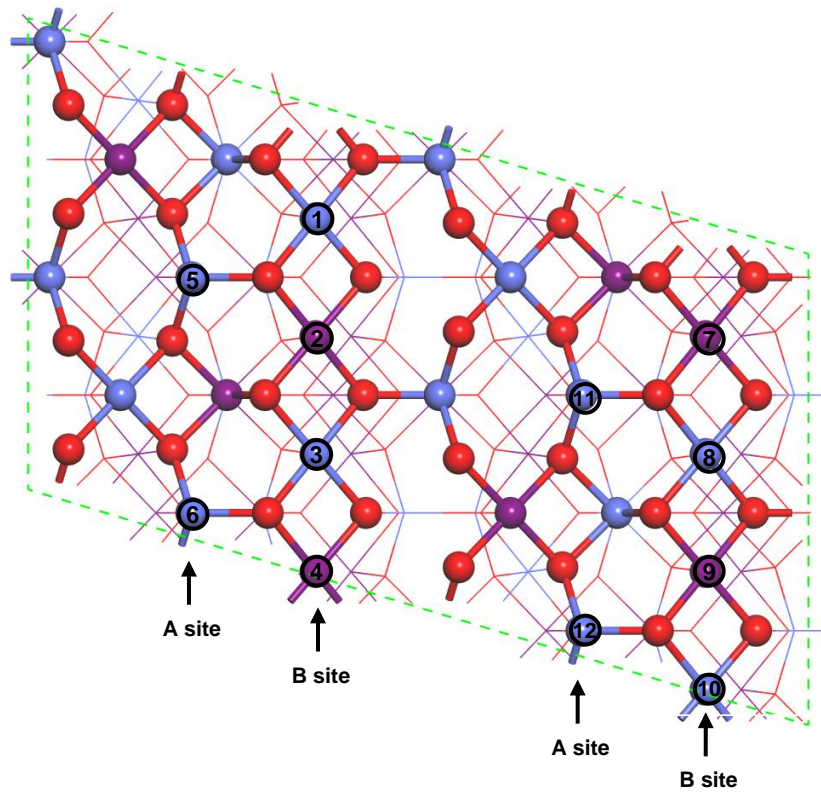

1  
 2 **Supplementary Figure 54. The whole unit cell structure of  $\text{Co}_2\text{MnO}_4$ .** The whole unit cell  
 3 of  $\text{Co}_2\text{MnO}_4$  with 4 A sites and 8 B sites on the surface.  
 4  
 5  
 6

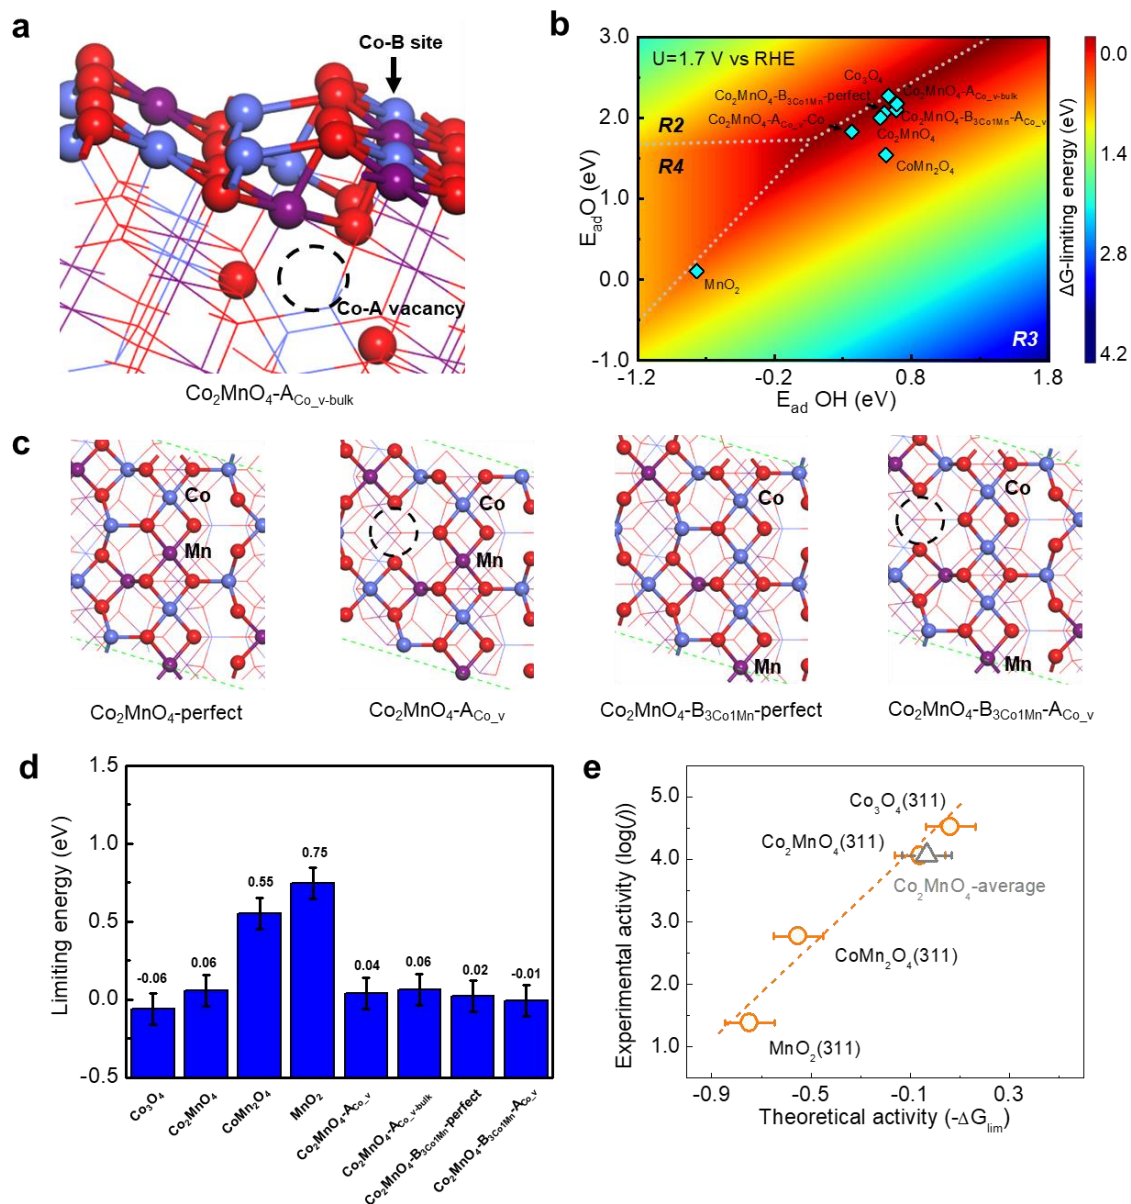

1  
 2 **Supplementary Figure 55. Comparison of activity on  $\text{Co}_2\text{MnO}_4$  with bulk defects.** **a**,  
 3 Surface structures of Mn-rich surface and surfaces with high Co:Mn ratio at the B site. The  
 4 dashed circles describe the location of Co vacancies (Details of structure descriptions see  
 5 Supplementary Table 21). **b**, Two-dimensional activity map showing the activity of OER on  
 6 different surfaces. **c**, Limiting energies of OER on different surfaces. **d**, The correlation  
 7 between experimental activities ( $\log(j)$ ) and theoretical ones ( $-\Delta G_{\text{lim}}$ ) derived from the  $\Delta G$ -  
 8 limiting energies. The triangle shows the theoretical result based on the average of all  
 9 calculated limiting energies of  $\text{Co}_2\text{MnO}_4$  shown in (c).

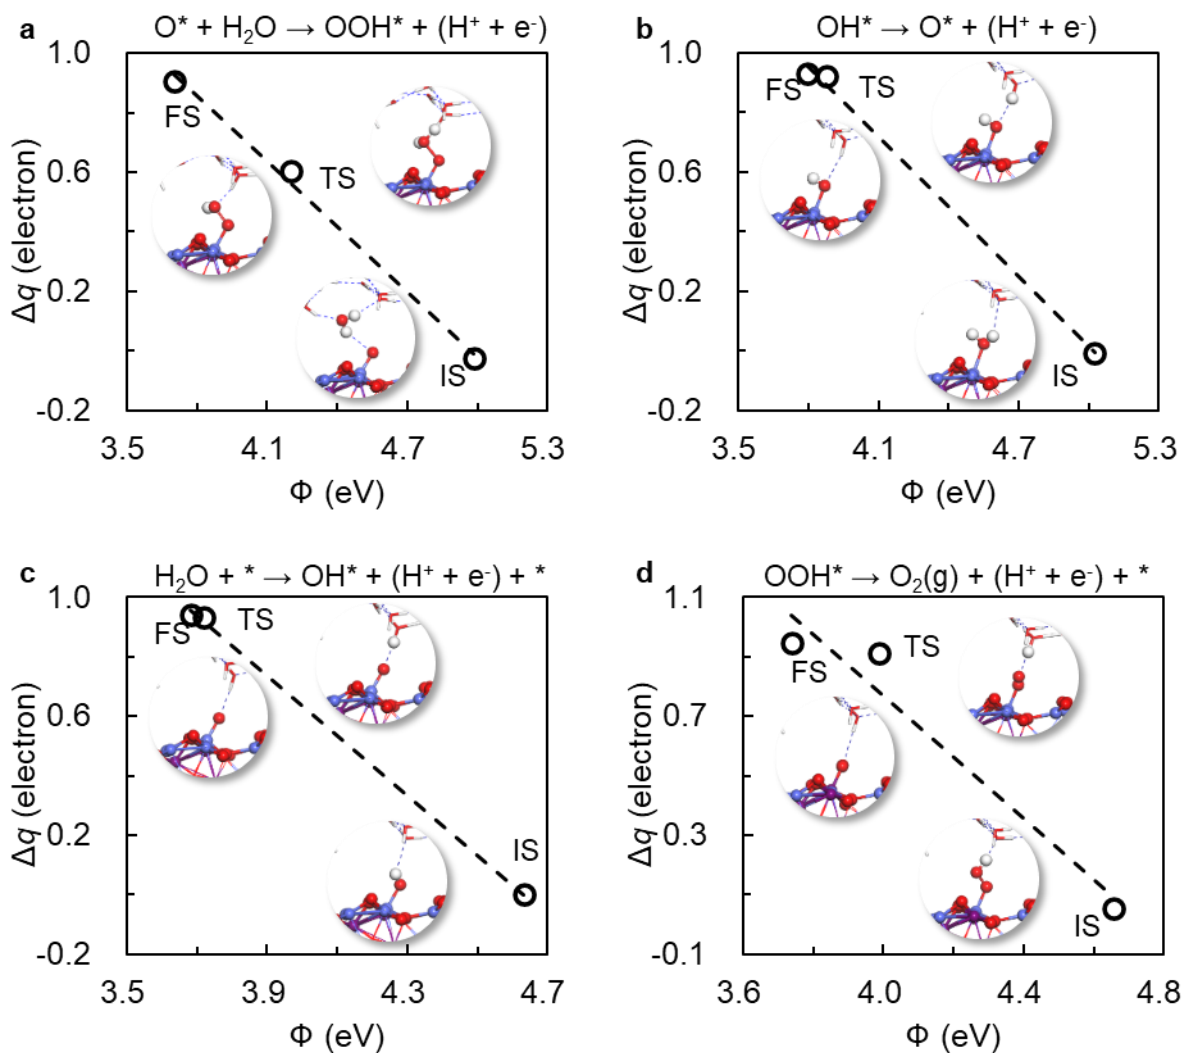

1

2 **Supplementary Figure 56. Calculated charge transfer and work function.** Calculated  
 3 charge transfer ( $\Delta q$ ) from water to electrode surface and work function ( $\Phi$ ) on the surfaces at  
 4 surfaces at initial (IS), transition (TS) and final (FS) states for electrochemical processes in  
 5 OER. The observed linear correlation between the amount of electron transfer and relative  
 6 work functions supports the validity of the capacitor model.

7

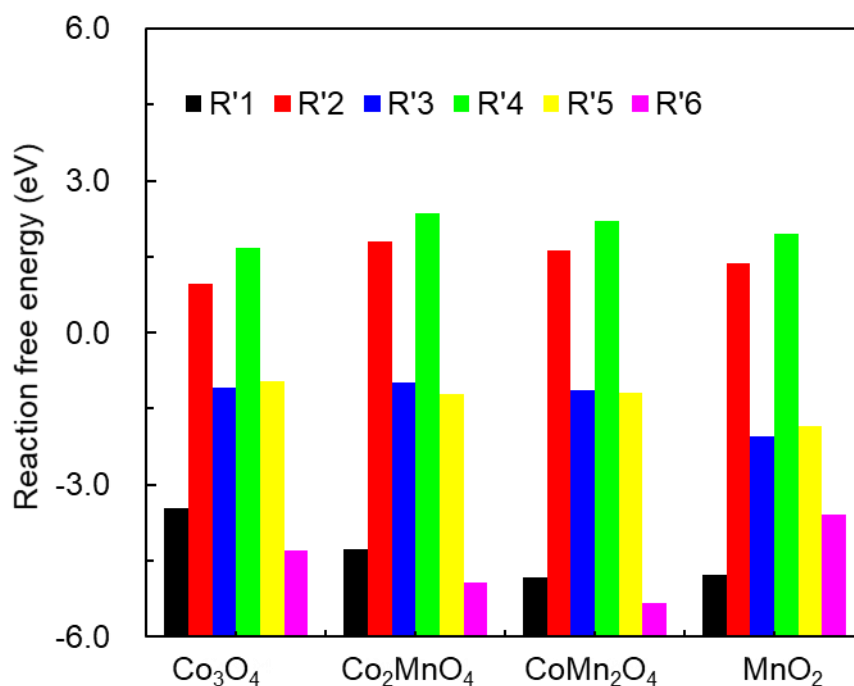

1

2 **Supplementary Figure 57. Free energies of elementary steps in dissolution reaction.**

3 Reaction free energies of elementary steps in catalyst dissolution. Two different pathways were  
 4 studied based on the priority of dissolution from either metal or oxygen. R'1 – R'3 is the M-  
 5 path which prioritizes metal dissolution. R'4 – R'6 is the O-path which prioritizes oxygen  
 6 dissolution. (See the detailed elementary steps in in Supplementary Table 23).

7

8



1

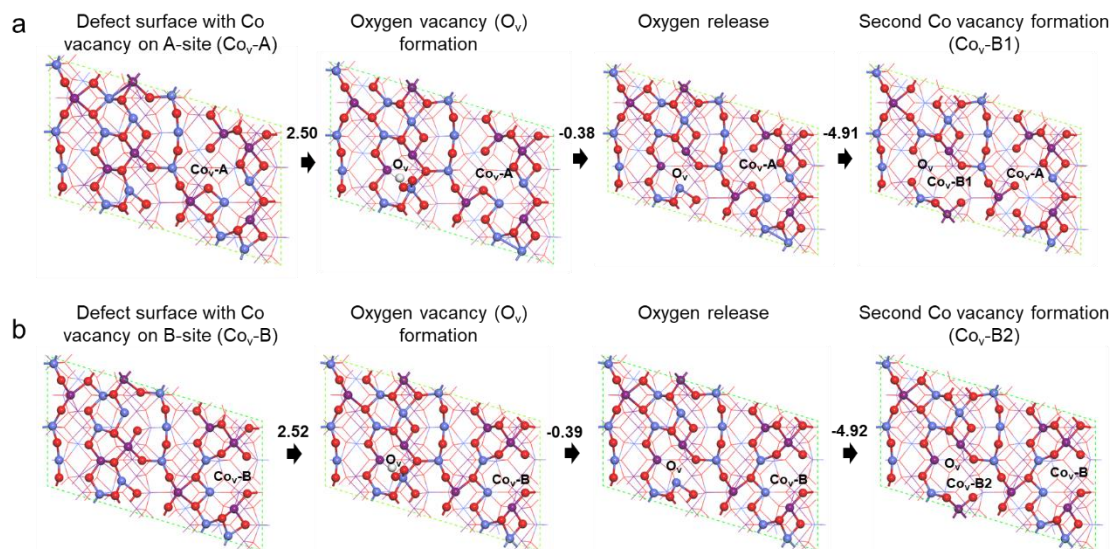

2

3

**Supplementary Figure 58. Dissolution of O and Co on  $\text{Co}_2\text{MnO}_4$  from a defect surface.**

4

Dissolution of O and Co on  $\text{Co}_2\text{MnO}_4$  from a surface with a Co vacancy at the A-site (a) and B-site

5

(b), based on the O-path in which oxygen dissolution precedes metal dissolution.

6

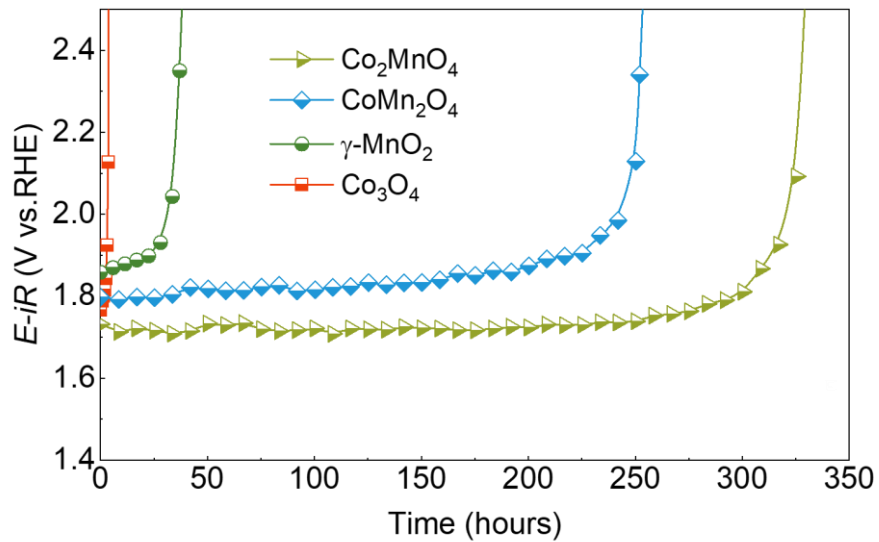

1  
 2 **Supplementary Figure 59. CP measurements of Co<sub>3</sub>O<sub>4</sub>, Co<sub>2</sub>MnO<sub>4</sub>, CoMn<sub>2</sub>O<sub>4</sub> and γ-**  
 3 **MnO<sub>2</sub>.** CP measurements at 100 mA cm<sup>-2</sup><sub>geo</sub> of γ-MnO<sub>2</sub>, CoMn<sub>2</sub>O<sub>4</sub>, Co<sub>2</sub>MnO<sub>4</sub> and Co<sub>3</sub>O<sub>4</sub>  
 4 deposited on FTO in H<sub>2</sub>SO<sub>4</sub> (pH 0) at 25 °C. Geometric area, 0.28 cm<sup>2</sup>.

5  
 6



# 1 Supplementary Tables

2 **Supplementary Table 1.** Structural parameters of Co<sub>2</sub>MnO<sub>4</sub> from SR-PXRD Rietveld  
3 refinements.

| Atom | Site        | <i>g</i> | <i>x</i>  | <i>y</i>  | <i>z</i>  | <i>B</i> (Å <sup>2</sup> ) | <i>U</i> (Å <sup>2</sup> ) |
|------|-------------|----------|-----------|-----------|-----------|----------------------------|----------------------------|
| Co1  | 8 <i>a</i>  | 0.841(3) | 1/8       | 1/8       | 1/8       | 0.17(3)                    | 0.0022(4)                  |
| Co2  | 16 <i>d</i> | 0.527(1) | 1/2       | 1/2       | 1/2       | 0.28(2)                    | 0.0036(3)                  |
| Mn   | 16 <i>d</i> | 0.473(1) | 1/2       | 1/2       | 1/2       | 0.28(2)                    | 0.0036(3)                  |
| O    | 32 <i>e</i> | 1        | 0.2628(3) | 0.2628(3) | 0.2628(3) | 0.72(6)                    | 0.0091(8)                  |

4 *Space group: Fd-3m space group; lattice parameters: a = 8.0866(3) Å, V = 528.80(4) Å<sup>3</sup>, R<sub>wp</sub> = 3.76%,*  
5 *R<sub>p</sub> = 2.90%, R<sub>e</sub> = 2.66%, S = 1.41, R<sub>B</sub> = 4.39%, R<sub>F</sub> = 2.36%; 3718 profile points (2θ = 3.0091°-*  
6 *39.9979°); 43 refined variables; 10 restraints. g, occupancy; B, U, equivalent isotropic atomic*  
7 *displacement parameters calculated from anisotropic atomic displacement parameters; x, y, and z,*  
8 *atomic coordinates. The structure was available from the Cambridge Crystal Structure Data Centre via*  
9 *internet (<https://www.ccdc.cam.ac.uk/>) with the deposition codes: CSD 2098166.*

10

11

1 **Supplementary Table 2.** Structural parameters of Co<sub>2</sub>MnO<sub>4</sub>-4h from SR-PXRD Rietveld  
2 refinements.

3

| Atom | Site        | <i>g</i> | <i>x</i>  | <i>y</i>  | <i>z</i>  | <i>B</i> (Å <sup>2</sup> ) | <i>U</i> (Å <sup>2</sup> ) |
|------|-------------|----------|-----------|-----------|-----------|----------------------------|----------------------------|
| Co1  | 8 <i>a</i>  | 0.771(3) | 1/8       | 1/8       | 1/8       | 0.33(3)                    | 0.0041(4)                  |
| Co2  | 16 <i>d</i> | 0.538(1) | 1/2       | 1/2       | 1/2       | 0.31(2)                    | 0.0040(3)                  |
| Mn   | 16 <i>d</i> | 0.462(1) | 1/2       | 1/2       | 1/2       | 0.31(4)                    | 0.0040(3)                  |
| O    | 32 <i>e</i> | 1        | 0.2643(2) | 0.2643(2) | 0.2643(2) | 0.60(2)                    | 0.0076(8)                  |

4 *Space group: Fd-3m space group; lattice parameters a = 8.0744(4) Å, V = 526.43(4) Å<sup>3</sup>, R<sub>wp</sub> = 2.98%,*  
5 *R<sub>p</sub> = 2.33%, R<sub>e</sub> = 2.29%, S = 1.30, R<sub>B</sub> = 1.39%, R<sub>F</sub> = 0.92%; 3718 profile points (2θ = 3.0091°-*  
6 *39.9979°); 47 refined variables; 10 restraints. g, occupancy; B, U, equivalent isotropic atomic*  
7 *displacement parameters calculated from anisotropic atomic displacement parameters; x, y, and z,*  
8 *atomic coordinates. The structure was available from the Cambridge Crystal Structure Data Centre via*  
9 *internet (<https://www.ccdc.cam.ac.uk/>) with the deposition codes: CSD 2098164.*

10

1 **Supplementary Table 3.** Structural parameters of Co<sub>2</sub>MnO<sub>4</sub>-23h from SR-PXRD Rietveld  
 2 refinements.

| Atom | Site        | <i>g</i> | <i>x</i>  | <i>y</i>  | <i>z</i>  | <i>B</i> (Å <sup>2</sup> ) | <i>U</i> (Å <sup>2</sup> ) |
|------|-------------|----------|-----------|-----------|-----------|----------------------------|----------------------------|
| Co1  | 8 <i>a</i>  | 0.715(4) | 1/8       | 1/8       | 1/8       | 0.31(4)                    | 0.0039(5)                  |
| Co2  | 16 <i>d</i> | 0.547(1) | 1/2       | 1/2       | 1/2       | 0.35(3)                    | 0.0044(3)                  |
| Mn   | 16 <i>d</i> | 0.453(1) | 1/2       | 1/2       | 1/2       | 0.35(3)                    | 0.0044(3)                  |
| O    | 32 <i>e</i> | 1        | 0.2635(3) | 0.2635(3) | 0.2635(3) | 0.71(7)                    | 0.0090(9)                  |

3 *Space group: Fd-3m space group; lattice parameters: a = 8.0723(4) Å, V = 526.02(5) Å<sup>3</sup>, R<sub>wp</sub> = 2.88%,*  
 4 *R<sub>p</sub> = 2.28%, R<sub>e</sub> = 2.31%, S = 1.25, R<sub>B</sub> = 2.11%, R<sub>F</sub> = 1.32%; 3718 profile points (2θ = 3.0091°-*  
 5 *39.9979°); 47 refined variables; 10 restraints. g, occupancy; B, U, equivalent isotropic atomic*  
 6 *displacement parameters calculated from anisotropic atomic displacement parameters; x, y, and z,*  
 7 *atomic coordinates.* The structure was available from the Cambridge Crystal Structure Data Centre via  
 8 internet (<https://www.ccdc.cam.ac.uk/>) with the deposition codes: CSD 2098165. The Rietveld  
 9 refinements show the occupancy of cobalt on tetragonal sites (8*a*) was decreased from 0.841(3)  
 10 to 0.771(3) and 0.715(4) after electrolysis for 4 and 23 hours, respectively, suggesting that  
 11 cobalt leaches predominantly from the tetragonal sites during electrolysis.  
 12

1 **Supplementary Table 4.** Fitting parameters of the Fourier-transformed  $k^3$ -weighted Co K-  
 2 edge EXAFS spectra of  $\text{Co}_3\text{O}_4$ . The uncertainty is given in parentheses. Two commonly used  
 3 parameters of  $R$ -factor and reduced chi-square were shown validating the rational fitting.

4

|                                             | Path                      | $N^a$ | $\Delta R(\text{\AA})$ | $R(\text{\AA})$  | $\sigma^2(\text{\AA}^2)$ | $S_o^2$        | $\Delta E_0(\text{eV})$ |
|---------------------------------------------|---------------------------|-------|------------------------|------------------|--------------------------|----------------|-------------------------|
| A site <sup>b</sup>                         | $\text{Co}_A\text{-O}$    | 4     | -0.002<br>(0.002)      | 1.941<br>(0.002) | 0.0037<br>(0.0003)       | 0.85<br>(0.03) | 1.6<br>(0.4)            |
|                                             | $\text{Co}_A\text{-Co}_B$ | 12    | 0.013<br>(0.004)       | 3.359<br>(0.004) | 0.0054<br>(0.0004)       |                |                         |
|                                             | $\text{Co}_A\text{-Co}_A$ | 4     | 0.01<br>(0.02)         | 3.51<br>(0.02)   | 0.003<br>(0.001)         |                |                         |
| B site <sup>b</sup>                         | $\text{Co}_B\text{-O}$    | 6     | -0.002<br>(0.002)      | 1.909<br>(0.002) | 0.0037<br>(0.0003)       |                |                         |
|                                             | $\text{Co}_B\text{-Co}_B$ | 6     | 0.005<br>(0.002)       | 2.859<br>(0.002) | 0.0036<br>(0.0002)       |                |                         |
|                                             | $\text{Co}_B\text{-Co}_A$ | 6     | 0.013<br>(0.004)       | 3.359<br>(0.004) | 0.0054<br>(0.0004)       |                |                         |
| Reduced chi-square: 87; $R$ -factor: 0.0018 |                           |       |                        |                  |                          |                |                         |

5 <sup>a</sup>Coordination numbers were fixed to the crystallography values.

6 <sup>b</sup>A site represents the tetrahedral site and B site represents the octahedral site in the spinel structure  
 7 ( $\text{AB}_2\text{O}_4$ ). Same for Supplementary Tables 5-7.

8

1 **Supplementary Table 5.** Fitting parameters of the Fourier-transformed  $k^3$ -weighted Mn K-  
 2 edge EXAFS spectra of MnO<sub>2</sub>. The uncertainty is given in parentheses. Two commonly used  
 3 parameters of  $R$ -factor and reduced chi-square were shown validating the rational fitting.

4

| Path                                        | $N^a$ | $\Delta R(\text{\AA})$ | $R(\text{\AA})$  | $\sigma^2(\text{\AA}^2)$ | $S_0^2$        | $\Delta E_0(\text{eV})$ |
|---------------------------------------------|-------|------------------------|------------------|--------------------------|----------------|-------------------------|
| Mn-O                                        | 6     | -0.004<br>(0.005)      | 1.882<br>(0.005) | 0.0028<br>(0.0006)       | 0.78<br>(0.07) | 0.2<br>(0.9)            |
| Mn-Mn.1<br>(second shell)                   | 2     | 0.008<br>(0.007)       | 2.881<br>(0.007) | 0.0021<br>(0.0007)       |                |                         |
| Mn-Mn.2<br>(third shell)                    | 8     | 0.011<br>(0.006)       | 3.437<br>(0.006) | 0.0041<br>(0.0005)       |                |                         |
| Reduced chi-square: 433; $R$ -factor: 0.020 |       |                        |                  |                          |                |                         |

5 <sup>a</sup>Coordination numbers were fixed to crystallography values.

6

1 **Supplementary Table 6.** Fitting parameters of Fourier-transformed  $k^3$ -weighted Co K-edge  
 2 EXAFS spectra of  $\text{Co}_2\text{MnO}_4$  before electrolysis and  $\text{Co}_2\text{MnO}_4$  after electrolysis at  $100 \text{ mA cm}^{-2}$   
 3  $_{\text{geo}}$  (pH 1  $\text{H}_2\text{SO}_4$ ,  $25 \text{ }^\circ\text{C}$ ) for 4 hours ( $\text{Co}_2\text{MnO}_4$ -4h) and 23 hours ( $\text{Co}_2\text{MnO}_4$ -23h). The  
 4 uncertainty is given in parentheses. Two commonly used parameters of  $R$ -factor and reduced  
 5 chi-square were shown validating the rational fitting<sup>a</sup>.

|                                                           |                          | A site                 |                           |                           |                           | B site                 |                           |                           |                           |
|-----------------------------------------------------------|--------------------------|------------------------|---------------------------|---------------------------|---------------------------|------------------------|---------------------------|---------------------------|---------------------------|
|                                                           |                          | $\text{Co}_A\text{-O}$ | $\text{Co}_A\text{-Co}_B$ | $\text{Co}_A\text{-Mn}_B$ | $\text{Co}_A\text{-Co}_A$ | $\text{Co}_B\text{-O}$ | $\text{Co}_B\text{-Co}_B$ | $\text{Co}_B\text{-Mn}_B$ | $\text{Co}_B\text{-Co}_A$ |
| $\text{Co}_2\text{MnO}_4$                                 | $N^b$                    | 4.1(0.5)               | 6.3                       | 5.7                       | 3.4                       | 6.1(0.5)               | 3.2                       | 2.8                       | 5.0                       |
|                                                           | $\sigma^2(\text{\AA}^2)$ | 0.0041<br>(0.0003)     | 0.0074<br>(0.0003)        | 0.0074<br>(0.0003)        | 0.008<br>(0.002)          | 0.0041<br>(0.0003)     | 0.0039<br>(0.0001)        | 0.0039<br>(0.0001)        | 0.0074<br>(0.0003)        |
|                                                           | $\Delta R(\text{\AA})$   | -0.007<br>(0.002)      | 0.020<br>(0.003)          | 0.020<br>(0.003)          | 0.03<br>(0.02)            | -0.007<br>(0.002)      | 0.006<br>(0.001)          | 0.006<br>(0.001)          | 0.020<br>(0.003)          |
|                                                           | $R(\text{\AA})$          | 1.923<br>(0.002)       | 3.372<br>(0.003)          | 3.372<br>(0.003)          | 3.53<br>(0.02)            | 1.916<br>(0.002)       | 2.865<br>(0.001)          | 2.865<br>(0.001)          | 3.372<br>(0.003)          |
| $\text{Co}_2\text{MnO}_4$<br>-4h                          | $N^b$                    | 4.1(0.5)               | 6.5                       | 5.5                       | 3.1                       | 6.2(0.4)               | 3.2                       | 2.8                       | 4.6                       |
|                                                           | $\sigma^2(\text{\AA}^2)$ | 0.0040<br>(0.0002)     | 0.0076<br>(0.0003)        | 0.0076<br>(0.0003)        | 0.007<br>(0.002)          | 0.0040<br>(0.0002)     | 0.0041<br>(0.0001)        | 0.0041<br>(0.0001)        | 0.0076<br>(0.0003)        |
|                                                           | $\Delta R(\text{\AA})$   | -0.010<br>(0.001)      | 0.017<br>(0.003)          | 0.017<br>(0.003)          | 0.03<br>(0.02)            | -0.010<br>(0.001)      | 0.002<br>(0.001)          | 0.002<br>(0.001)          | 0.017<br>(0.003)          |
|                                                           | $R(\text{\AA})$          | 1.920<br>(0.001)       | 3.370<br>(0.003)          | 3.370<br>(0.003)          | 3.53<br>(0.02)            | 1.914<br>(0.001)       | 2.861<br>(0.001)          | 2.861<br>(0.001)          | 3.370<br>(0.003)          |
| $\text{Co}_2\text{MnO}_4$<br>-23h                         | $N^b$                    | 4.1(0.6)               | 6.6                       | 5.4                       | 2.9                       | 6.2(0.4)               | 3.3                       | 2.7                       | 4.3                       |
|                                                           | $\sigma^2(\text{\AA}^2)$ | 0.0040<br>(0.0003)     | 0.0076<br>(0.0004)        | 0.0076<br>(0.0004)        | 0.007<br>(0.003)          | 0.0040<br>(0.0003)     | 0.0043<br>(0.0002)        | 0.0043<br>(0.0002)        | 0.0076<br>(0.0004)        |
|                                                           | $\Delta R(\text{\AA})$   | -0.011<br>(0.002)      | 0.017<br>(0.003)          | 0.017<br>(0.003)          | 0.03<br>(0.02)            | -0.011<br>(0.002)      | 0.001<br>(0.002)          | 0.001<br>(0.002)          | 0.017<br>(0.003)          |
|                                                           | $R(\text{\AA})$          | 1.919<br>(0.002)       | 3.370<br>(0.003)          | 3.370<br>(0.003)          | 3.54<br>(0.02)            | 1.913<br>(0.002)       | 2.860<br>(0.002)          | 2.860<br>(0.002)          | 3.370<br>(0.003)          |
| $S_0^2 = 0.85$ ; $\Delta E_0 = 1.6 \text{ eV}^c$          |                          |                        |                           |                           |                           |                        |                           |                           |                           |
| Reduced chi-square: 167; $R$ -factor: 0.0015 <sup>d</sup> |                          |                        |                           |                           |                           |                        |                           |                           |                           |

6 <sup>a</sup>The average Co-O coordination number was calculated by weighting the fitted results of  $\text{Co}_A\text{-O}$  and  $\text{Co}_B\text{-O}$  in  
 7 relative proportions of Co in A site and B site obtained from SR-PXRD Rietveld refinement. The results are 5.2,  
 8 5.3 and 5.4 for  $\text{Co}_2\text{MnO}_4$ ,  $\text{Co}_2\text{MnO}_4$ -4h and  $\text{Co}_2\text{MnO}_4$ -23h, respectively.

9 <sup>b</sup>The coordination numbers of  $\text{Co}_A\text{-O}$  and  $\text{Co}_B\text{-O}$  were let free, others were fixed. Particularly, the coordination  
 10 numbers of  $\text{Co}_A\text{-Co}_B$ ,  $\text{Co}_A\text{-Mn}_B$ ,  $\text{Co}_A\text{-Co}_A$ ,  $\text{Co}_B\text{-Co}_B$ ,  $\text{Co}_B\text{-Mn}_B$  and  $\text{Co}_B\text{-Co}_A$  were calculated by multiplying  
 11 corresponding occupancy obtained from SR-PXRD Rietveld refinements to the crystallography coordination  
 12 number values.

13 <sup>c</sup>The  $S_0^2$  and  $\Delta E_0$  was obtained by fitting of standard  $\text{Co}_3\text{O}_4$  sample.

14 <sup>d</sup>Three data set of  $\text{Co}_2\text{MnO}_4$  before and after electrolysis were fitted together. Therefore, they shared the same  
 15 reduced chi-square and  $R$ -factor.

16

1 **Supplementary Table 7.** Fitting parameters of the Fourier-transformed  $k^3$ -weighted Mn K-  
2 edge EXAFS spectra of  $\text{Co}_2\text{MnO}_4$  before electrolysis and  $\text{Co}_2\text{MnO}_4$  after electrolysis at 100  
3  $\text{mA cm}^{-2}_{\text{geo}}$  (pH 1  $\text{H}_2\text{SO}_4$ , 25 °C) for 4 hours ( $\text{Co}_2\text{MnO}_4$ -4h) and 23 hours ( $\text{Co}_2\text{MnO}_4$ -23h). The  
4 uncertainty is given in parentheses. Two commonly used parameters of  $R$ -factor and reduced  
5 chi-square were shown validating the rational fitting.

| Samples                                                  | Path                      | $N^a$        | $\Delta R(\text{\AA})$ | $R(\text{\AA})$  | $\sigma^2(\text{\AA}^2)$ |
|----------------------------------------------------------|---------------------------|--------------|------------------------|------------------|--------------------------|
| $\text{Co}_2\text{MnO}_4$                                | $\text{Mn}_B\text{-O.1}$  | 5.5<br>(0.4) | -0.043<br>(0.003)      | 1.880<br>(0.003) | 0.0050<br>(0.0005)       |
|                                                          | $\text{Mn}_B\text{-Mn}_B$ | 3.2          | -0.003<br>(0.003)      | 2.856<br>(0.003) | 0.0095<br>(0.0004)       |
|                                                          | $\text{Mn}_B\text{-Co}_B$ | 2.8          | -0.003<br>(0.003)      | 2.856<br>(0.003) | 0.0095<br>(0.0004)       |
|                                                          | $\text{Mn}_B\text{-Co}_A$ | 5.0          | 0.07<br>(0.01)         | 3.42<br>(0.01)   | 0.010<br>(0.001)         |
|                                                          | $\text{Mn}_B\text{-O.3}$  | 6            | 0.05<br>(0.03)         | 3.61<br>(0.03)   | 0.006<br>(0.002)         |
| $\text{Co}_2\text{MnO}_4$ -4h                            | $\text{Mn}_B\text{-O.1}$  | 6.0<br>(0.6) | -0.044<br>(0.005)      | 1.880<br>(0.005) | 0.0054<br>(0.0009)       |
|                                                          | $\text{Mn}_B\text{-Mn}_B$ | 3.2          | -0.014<br>(0.006)      | 2.845<br>(0.006) | 0.0087<br>(0.0006)       |
|                                                          | $\text{Mn}_B\text{-Co}_B$ | 2.8          | -0.014<br>(0.006)      | 2.845<br>(0.006) | 0.0087<br>(0.0006)       |
|                                                          | $\text{Mn}_B\text{-Co}_A$ | 4.6          | 0.07<br>(0.03)         | 3.42<br>(0.03)   | 0.010<br>(0.002)         |
|                                                          | $\text{Mn}_B\text{-O.3}$  | 6            | 0.04<br>(0.05)         | 3.61<br>(0.05)   | 0.005<br>(0.004)         |
| $\text{Co}_2\text{MnO}_4$ -23h                           | $\text{Mn}_B\text{-O.1}$  | 5.9<br>(0.8) | -0.045<br>(0.005)      | 1.878<br>(0.005) | 0.005<br>(0.001)         |
|                                                          | $\text{Mn}_B\text{-Mn}_B$ | 3.3          | -0.016<br>(0.006)      | 2.843<br>(0.006) | 0.0086<br>(0.0007)       |
|                                                          | $\text{Mn}_B\text{-Co}_B$ | 2.7          | -0.016<br>(0.006)      | 2.843<br>(0.006) | 0.0086<br>(0.0007)       |
|                                                          | $\text{Mn}_B\text{-Co}_A$ | 4.3          | 0.07<br>(0.03)         | 3.42<br>(0.03)   | 0.009<br>(0.002)         |
|                                                          | $\text{Mn}_B\text{-O.3}$  | 6            | 0.05<br>(0.06)         | 3.61<br>(0.06)   | 0.006<br>(0.005)         |
| $S_0^2 = 0.78; \Delta E_0 = 0.2 \text{ eV}^b$            |                           |              |                        |                  |                          |
| Reduced chi-square: 714; $R$ -factor: 0.014 <sup>c</sup> |                           |              |                        |                  |                          |

6 <sup>a</sup>The coordination number of  $\text{Mn}_B\text{-O.1}$  was let free, others were fixed. Particularly, the coordination numbers of  
7  $\text{Mn}_B\text{-Mn}_B$ ,  $\text{Mn}_B\text{-Co}_B$  and  $\text{Mn}_B\text{-Co}_A$  were calculated by multiplying corresponding occupancy obtained from SR-  
8 PXRD Rietveld refinements to the crystallography coordination number values.

9 <sup>b</sup>The  $S_0^2$  and  $\Delta E_0$  was obtained by fitting of standard  $\beta\text{-MnO}_2$  sample.

10 <sup>c</sup>Three data set of  $\text{Co}_2\text{MnO}_4$  before and after electrolysis were fitted together. Therefore, they shared the same  
11 reduced chi-square and  $R$ -factor.

1 **Supplementary Table 8.** Fitting parameters of XPS Co2p spectrum of Co<sub>2</sub>MnO<sub>4</sub> before  
2 electrolysis.

3

| No | Name                                         | Position | FWHM | Line shape | %At   |
|----|----------------------------------------------|----------|------|------------|-------|
| 1  | Co <sup>3+</sup> 2p <sub>3/2</sub>           | 779.64   | 1.58 | GL(30)     | 25.5% |
| 2  | Co <sup>3+</sup> 2p <sub>3/2</sub> satellite | 789.00   | 4.18 | GL(30)     | 7.2%  |
| 3  | Co <sup>3+</sup> 2p <sub>1/2</sub>           | 794.81   | 1.70 | GL(30)     | 12.8% |
| 4  | Co <sup>3+</sup> 2p <sub>1/2</sub> satellite | 805.02   | 4.71 | GL(30)     | 4.7%  |
| 5  | Co <sup>2+</sup> 2p <sub>3/2</sub>           | 781.00   | 2.08 | GL(30)     | 19.6% |
| 6  | Co <sup>2+</sup> 2p <sub>3/2</sub> satellite | 782.45   | 5.78 | GL(30)     | 17.4% |
| 7  | Co <sup>2+</sup> 2p <sub>1/2</sub>           | 796.55   | 2.20 | GL(30)     | 9.8%  |
| 8  | Co <sup>2+</sup> 2p <sub>1/2</sub> satellite | 801.78   | 4.71 | GL(30)     | 3.1%  |

4

5

6



1 **Supplementary Table 9.** Fitting parameters of XPS Co2p spectrum of Co<sub>2</sub>MnO<sub>4</sub>-4h (after  
2 electrolysis for 4 hours at 100 mA cm<sup>-2</sup><sub>geo</sub>, pH 1 H<sub>2</sub>SO<sub>4</sub>, 25 °C).

3

| No | Name                                         | Position | FWHM | Line shape | %At   |
|----|----------------------------------------------|----------|------|------------|-------|
| 1  | Co <sup>3+</sup> 2p <sub>3/2</sub>           | 779.64   | 1.65 | GL(30)     | 30.07 |
| 2  | Co <sup>3+</sup> 2p <sub>3/2</sub> satellite | 789      | 3.82 | GL(30)     | 6.48  |
| 3  | Co <sup>3+</sup> 2p <sub>1/2</sub>           | 794.81   | 1.78 | GL(30)     | 15.03 |
| 4  | Co <sup>3+</sup> 2p <sub>1/2</sub> satellite | 805.02   | 4.07 | GL(30)     | 4.21  |
| 5  | Co <sup>2+</sup> 2p <sub>3/2</sub>           | 781      | 2.14 | GL(30)     | 16.73 |
| 6  | Co <sup>2+</sup> 2p <sub>3/2</sub> satellite | 782.45   | 5.21 | GL(30)     | 16.3  |
| 7  | Co <sup>2+</sup> 2p <sub>1/2</sub>           | 796.55   | 2.13 | GL(30)     | 8.37  |
| 8  | Co <sup>2+</sup> 2p <sub>1/2</sub> satellite | 801.78   | 4.07 | GL(30)     | 2.81  |

4

5

6

1 **Supplementary Table 10.** Fitting parameters of XPS Co2p spectrum of Co<sub>2</sub>MnO<sub>4</sub>-23h (after  
2 electrolysis for 23 hours at 100 mA cm<sup>-2</sup><sub>geo</sub>, pH 1 H<sub>2</sub>SO<sub>4</sub>, 25 °C).

3

| No | Name                                         | Position | FWHM | Line shape | %At   |
|----|----------------------------------------------|----------|------|------------|-------|
| 1  | Co <sup>3+</sup> 2p <sub>3/2</sub>           | 779.64   | 1.86 | GL(30)     | 36.42 |
| 2  | Co <sup>3+</sup> 2p <sub>3/2</sub> satellite | 789      | 3.8  | GL(30)     | 7.14  |
| 3  | Co <sup>3+</sup> 2p <sub>1/2</sub>           | 794.81   | 2.07 | GL(30)     | 18.21 |
| 4  | Co <sup>3+</sup> 2p <sub>1/2</sub> satellite | 805.02   | 4.29 | GL(30)     | 0.23  |
| 5  | Co <sup>2+</sup> 2p <sub>3/2</sub>           | 781      | 2.54 | GL(30)     | 14.17 |
| 6  | Co <sup>2+</sup> 2p <sub>3/2</sub> satellite | 782.45   | 5.40 | GL(30)     | 16.59 |
| 7  | Co <sup>2+</sup> 2p <sub>1/2</sub>           | 796.55   | 2.32 | GL(30)     | 7.08  |
| 8  | Co <sup>2+</sup> 2p <sub>1/2</sub> satellite | 801.78   | 4.29 | GL(30)     | 0.15  |

4

5

6

1 **Supplementary Table 11.** Fitting parameters of XPS Mn2*p* spectrum of Co<sub>2</sub>MnO<sub>4</sub> before  
 2 electrolysis.

3

| No | Name                     | Position | FWHM | Line shape | %At  |
|----|--------------------------|----------|------|------------|------|
| 1  | Mn <sup>4+</sup> -Peak 1 | 642.03   | 1.45 | GL(50)     | 6.7  |
| 2  | Mn <sup>4+</sup> -Peak 2 | 642.81   | 1.45 | GL(50)     | 3.6  |
| 3  | Mn <sup>4+</sup> -Peak 3 | 643.40   | 1.45 | GL(50)     | 3.3  |
| 4  | Mn <sup>4+</sup> -Peak 4 | 644.10   | 1.45 | GL(50)     | 1.9  |
| 5  | Mn <sup>4+</sup> -Peak 5 | 644.88   | 1.45 | GL(50)     | 1.1  |
| 6  | Mn <sup>4+</sup> -Peak 6 | 645.79   | 1.45 | GL(50)     | 0.6  |
| 7  | Mn <sup>4+</sup> -Peak 7 | 646.88   | 1.45 | GL(50)     | 0.2  |
| 8  | Mn <sup>4+</sup> -Peak 8 | 647.10   | 1.45 | GL(50)     | 0.1  |
| 9  | Mn <sup>3+</sup> -Peak 1 | 640.78   | 1.60 | GL(50)     | 20.2 |
| 10 | Mn <sup>3+</sup> -Peak 2 | 641.57   | 1.60 | GL(50)     | 20.3 |
| 11 | Mn <sup>3+</sup> -Peak 3 | 642.25   | 1.60 | GL(50)     | 16.2 |
| 12 | Mn <sup>3+</sup> -Peak 4 | 643.01   | 1.60 | GL(50)     | 12.5 |
| 13 | Mn <sup>3+</sup> -Peak 5 | 643.83   | 1.60 | GL(50)     | 6.6  |
| 14 | Mn <sup>3+</sup> -Peak 6 | 644.67   | 1.60 | GL(50)     | 3.6  |
| 15 | Mn <sup>3+</sup> -Peak 7 | 645.69   | 1.60 | GL(50)     | 1.5  |
| 16 | Mn <sup>3+</sup> -Peak 8 | 638.98   | 1.91 | GL(50)     | 0.7  |
| 17 | Mn <sup>2+</sup> -Peak 1 | 639.28   | 1.70 | GL(50)     | 0.3  |
| 18 | Mn <sup>2+</sup> -Peak 2 | 640.32   | 1.70 | GL(30)     | 0.2  |
| 19 | Mn <sup>2+</sup> -Peak 3 | 641.08   | 1.70 | GL(30)     | 0.1  |
| 20 | Mn <sup>2+</sup> -Peak 4 | 641.96   | 1.70 | GL(30)     | 0.1  |
| 21 | Mn <sup>2+</sup> -Peak 5 | 643.04   | 1.70 | GL(30)     | 0.0  |
| 22 | Mn <sup>2+</sup> -Peak 6 | 644.13   | 2.10 | GL(30)     | 0.0  |
| 23 | Mn <sup>2+</sup> -Peak 7 | 646.16   | 3.12 | GL(30)     | 0.1  |
| 24 | Mn <sup>2+</sup> -Peak 8 | 637.63   | 1.90 | GL(30)     | 0.0  |

4

5

1 **Supplementary Table 12.** Fitting parameters of XPS Mn2*p* spectrum of Co<sub>2</sub>MnO<sub>4</sub>-4h (after  
 2 electrolysis for 4 hours at 100 mA cm<sup>-2</sup><sub>geo</sub>, pH 1 H<sub>2</sub>SO<sub>4</sub>, 25 °C).

3

| No | Name                     | Position | FWHM | Line shape | %At   |
|----|--------------------------|----------|------|------------|-------|
| 1  | Mn <sup>4+</sup> -Peak 1 | 642.03   | 1.33 | GL(50)     | 6.43  |
| 2  | Mn <sup>4+</sup> -Peak 2 | 642.81   | 1.33 | GL(50)     | 4.08  |
| 3  | Mn <sup>4+</sup> -Peak 3 | 643.4    | 1.33 | GL(50)     | 3.94  |
| 4  | Mn <sup>4+</sup> -Peak 4 | 644.1    | 1.33 | GL(50)     | 1.7   |
| 5  | Mn <sup>4+</sup> -Peak 5 | 644.88   | 1.33 | GL(50)     | 1.02  |
| 6  | Mn <sup>4+</sup> -Peak 6 | 645.79   | 1.33 | GL(50)     | 0.53  |
| 7  | Mn <sup>4+</sup> -Peak 7 | 646.88   | 1.33 | GL(50)     | 0.22  |
| 8  | Mn <sup>4+</sup> -Peak 8 | 647.1    | 1.33 | GL(50)     | 0.08  |
| 9  | Mn <sup>3+</sup> -Peak 1 | 640.78   | 1.48 | GL(50)     | 20.47 |
| 10 | Mn <sup>3+</sup> -Peak 2 | 641.57   | 1.48 | GL(50)     | 20.58 |
| 11 | Mn <sup>3+</sup> -Peak 3 | 642.25   | 1.48 | GL(50)     | 15.42 |
| 12 | Mn <sup>3+</sup> -Peak 4 | 643.01   | 1.48 | GL(50)     | 11.72 |
| 13 | Mn <sup>3+</sup> -Peak 5 | 643.83   | 1.48 | GL(50)     | 6.71  |
| 14 | Mn <sup>3+</sup> -Peak 6 | 644.67   | 1.48 | GL(50)     | 3.6   |
| 15 | Mn <sup>3+</sup> -Peak 7 | 645.69   | 1.48 | GL(50)     | 1.5   |
| 16 | Mn <sup>3+</sup> -Peak 8 | 638.98   | 1.48 | GL(50)     | 0.74  |
| 17 | Mn <sup>2+</sup> -Peak 1 | 639.28   | 1.58 | GL(50)     | 0.42  |
| 18 | Mn <sup>2+</sup> -Peak 2 | 640.32   | 1.58 | GL(30)     | 0.21  |
| 19 | Mn <sup>2+</sup> -Peak 3 | 641.08   | 1.58 | GL(30)     | 0.21  |
| 20 | Mn <sup>2+</sup> -Peak 4 | 641.96   | 1.58 | GL(30)     | 0.15  |
| 21 | Mn <sup>2+</sup> -Peak 5 | 643.04   | 1.58 | GL(30)     | 0.07  |
| 22 | Mn <sup>2+</sup> -Peak 6 | 644.13   | 1.58 | GL(30)     | 0.03  |
| 23 | Mn <sup>2+</sup> -Peak 7 | 646.16   | 1.58 | GL(30)     | 0.13  |
| 24 | Mn <sup>2+</sup> -Peak 8 | 637.63   | 1.98 | GL(30)     | 0.02  |

4

5

1 **Supplementary Table 13.** Fitting parameters of XPS Mn2*p* spectrum of Co<sub>2</sub>MnO<sub>4</sub>-23h (after  
 2 electrolysis for 23 hours at 100 mA cm<sup>-2</sup><sub>geo</sub>, pH 1 H<sub>2</sub>SO<sub>4</sub>, 25 °C).

3

| No | Name                     | Position | FWHM | Line shape | %At   |
|----|--------------------------|----------|------|------------|-------|
| 1  | Mn <sup>4+</sup> -Peak 1 | 642.03   | 1.34 | GL(50)     | 6.85  |
| 2  | Mn <sup>4+</sup> -Peak 2 | 642.81   | 1.34 | GL(50)     | 3.89  |
| 3  | Mn <sup>4+</sup> -Peak 3 | 643.4    | 1.34 | GL(50)     | 3.65  |
| 4  | Mn <sup>4+</sup> -Peak 4 | 644.1    | 1.34 | GL(50)     | 2.01  |
| 5  | Mn <sup>4+</sup> -Peak 5 | 644.88   | 1.34 | GL(50)     | 1.31  |
| 6  | Mn <sup>4+</sup> -Peak 6 | 645.79   | 1.34 | GL(50)     | 0.55  |
| 7  | Mn <sup>4+</sup> -Peak 7 | 646.88   | 1.34 | GL(50)     | 0.23  |
| 8  | Mn <sup>4+</sup> -Peak 8 | 647.1    | 1.34 | GL(50)     | 0.08  |
| 9  | Mn <sup>3+</sup> -Peak 1 | 640.78   | 1.49 | GL(50)     | 20.34 |
| 10 | Mn <sup>3+</sup> -Peak 2 | 641.57   | 1.49 | GL(50)     | 20.44 |
| 11 | Mn <sup>3+</sup> -Peak 3 | 642.25   | 1.49 | GL(50)     | 15.31 |
| 12 | Mn <sup>3+</sup> -Peak 4 | 643.01   | 1.49 | GL(50)     | 12.13 |
| 13 | Mn <sup>3+</sup> -Peak 5 | 643.83   | 1.49 | GL(50)     | 6.16  |
| 14 | Mn <sup>3+</sup> -Peak 6 | 644.67   | 1.49 | GL(50)     | 3.58  |
| 15 | Mn <sup>3+</sup> -Peak 7 | 645.69   | 1.49 | GL(50)     | 1.49  |
| 16 | Mn <sup>3+</sup> -Peak 8 | 638.98   | 1.49 | GL(50)     | 0.74  |
| 17 | Mn <sup>2+</sup> -Peak 1 | 639.28   | 1.59 | GL(50)     | 0.39  |
| 18 | Mn <sup>2+</sup> -Peak 2 | 640.32   | 1.59 | GL(30)     | 0.27  |
| 19 | Mn <sup>2+</sup> -Peak 3 | 641.08   | 1.59 | GL(30)     | 0.2   |
| 20 | Mn <sup>2+</sup> -Peak 4 | 641.96   | 1.59 | GL(30)     | 0.14  |
| 21 | Mn <sup>2+</sup> -Peak 5 | 643.04   | 1.59 | GL(30)     | 0.06  |
| 22 | Mn <sup>2+</sup> -Peak 6 | 644.13   | 1.59 | GL(30)     | 0.03  |
| 23 | Mn <sup>2+</sup> -Peak 7 | 646.16   | 1.59 | GL(30)     | 0.12  |
| 24 | Mn <sup>2+</sup> -Peak 8 | 637.63   | 1.99 | GL(30)     | 0.02  |

4

5

### Supplementary Table 14. Activity and stability comparison of 3d catalysts in literature.

The activity is summarized in terms of the three metrics: (1) overpotential ( $\eta$ ) at  $10 \text{ mA cm}^{-2}_{\text{geo}}$ , as a general metric in literature; (2) specific activity per electrochemical surface area ( $j_{\text{ECSA}}$ ) at  $\eta = 0.35 \text{ V}$ , following the protocol suggested by McCrory et al. (ref. <sup>12</sup>); (3) the activity per geometric area ( $j_{\text{geo}}$ ) at  $\eta = 0.72 \text{ V}$ , where  $\text{Co}_2\text{MnO}_4$  on FTO reached  $1000 \text{ mA cm}^{-2}_{\text{geo}}$  in this work. All overpotentials refer to the values after  $iR$  correction. As there is no consistent criteria to evaluate stability, the electrochemical conditions used for the stability evaluation is also included in the table. The most active material from each literature is shown in Fig. 4b, along with some other materials such as amorphous  $\text{CoMnO}_x$ , which was chosen due to its similar elemental composition with  $\text{Co}_2\text{MnO}_4$ .

| Catalyst material                                     | Preparation methods   | $\eta$ (V) at $10 \text{ mA cm}^{-2}_{\text{geo}}$ | $j_{\text{ECSA}}$ at $\eta = 0.35 \text{ V}$ ( $\text{mA cm}^{-2}_{\text{ECSA}}$ ) | $j_{\text{geo}}$ at $\eta = 0.72 \text{ V}$ ( $\text{mA cm}^{-2}_{\text{geo}}$ ) | Electrolyte condition          | Stability performance                                                           | Ref           |
|-------------------------------------------------------|-----------------------|----------------------------------------------------|------------------------------------------------------------------------------------|----------------------------------------------------------------------------------|--------------------------------|---------------------------------------------------------------------------------|---------------|
| $\text{Co}_2\text{MnO}_4$ on FTO                      | Thermal decomposition | 0.395                                              | 0.027                                                                              | 1000                                                                             | pH 1.0 $\text{H}_2\text{SO}_4$ | 320 h at $100 \text{ mA cm}^{-2}_{\text{geo}}$ (LT)                             | This work     |
| $\text{Co}_2\text{MnO}_4$ on Pt/Ti mesh               | Thermal decomposition | 0.298                                              | 0.020                                                                              | 2000 at $\eta = 0.63 \text{ V}$                                                  | pH 1.0 in Pi                   | 1500 h at $200 \text{ mA cm}^{-2}_{\text{geo}}$ (LT)                            | This work     |
| $\gamma\text{-MnO}_2$                                 | Thermal decomposition | $0.489 \pm 0.005$                                  | NA                                                                                 | NA                                                                               | 1.0 M $\text{H}_2\text{SO}_4$  | 8000 h at $10 \text{ mA cm}^{-2}_{\text{geo}}$ (OT)                             | <sup>20</sup> |
| Co-(b)                                                | Electrodeposition     | $1.12 \pm 0.01^a$                                  | $< 0.01$                                                                           | NA                                                                               | 1.0 M $\text{H}_2\text{SO}_4$  | $< 2 \text{ h}$ at $10 \text{ mA cm}^{-2}_{\text{geo}}$ (LT)                    | <sup>12</sup> |
| Co/B                                                  | Electrodeposition     | $1.13 \pm 0.01^a$                                  | $< 0.01$                                                                           | NA                                                                               | 1.0 M $\text{H}_2\text{SO}_4$  | $< 2 \text{ h}$ at $10 \text{ mA cm}^{-2}_{\text{geo}}$ (LT)                    | <sup>12</sup> |
| Co/P-(a)                                              | Electrodeposition     | $1.12 \pm 0.02^a$                                  | $< 0.01$                                                                           | NA                                                                               | 1.0 M $\text{H}_2\text{SO}_4$  | $< 2 \text{ h}$ at $10 \text{ mA cm}^{-2}_{\text{geo}}$ (LT)                    | <sup>12</sup> |
| Co/P-(b)                                              | Electrodeposition     | $1.13 \pm 0.01^a$                                  | $< 0.01$                                                                           | NA                                                                               | 1.0 M $\text{H}_2\text{SO}_4$  | $< 2 \text{ h}$ at $10 \text{ mA cm}^{-2}_{\text{geo}}$ (LT)                    | <sup>12</sup> |
| CoFe                                                  | Electrodeposition     | $1.11 \pm 0.01^a$                                  | $< 0.01$                                                                           | NA                                                                               | 1.0 M $\text{H}_2\text{SO}_4$  | $< 2 \text{ h}$ at $10 \text{ mA cm}^{-2}_{\text{geo}}$ (LT)                    | <sup>12</sup> |
| Cu                                                    | Electrodeposition     | $1.12 \pm 0.02^a$                                  | $< 0.01$                                                                           | NA                                                                               | 1.0 M $\text{H}_2\text{SO}_4$  | $< 2 \text{ h}$ at $10 \text{ mA cm}^{-2}_{\text{geo}}$ (LT)                    | <sup>12</sup> |
| Fe(b)                                                 | Electrodeposition     | $1.14 \pm 0.01^a$                                  | $< 0.01$                                                                           | NA                                                                               | 1.0 M $\text{H}_2\text{SO}_4$  | $< 2 \text{ h}$ at $10 \text{ mA cm}^{-2}_{\text{geo}}$ (LT)                    | <sup>12</sup> |
| FeMn                                                  | Electrodeposition     | $1.14 \pm 0.01^a$                                  | $< 0.01$                                                                           | NA                                                                               | 1.0 M $\text{H}_2\text{SO}_4$  | $< 2 \text{ h}$ at $10 \text{ mA cm}^{-2}_{\text{geo}}$ (LT)                    | <sup>12</sup> |
| Ni(b)                                                 | Electrodeposition     | $1.10 \pm 0.04^a$                                  | $< 0.01$                                                                           | NA                                                                               | 1.0 M $\text{H}_2\text{SO}_4$  | $< 2 \text{ h}$ at $10 \text{ mA cm}^{-2}_{\text{geo}}$ (LT)                    | <sup>12</sup> |
| Ni/B                                                  | Electrodeposition     | $1.15 \pm 0.04^a$                                  | $< 0.01$                                                                           | NA                                                                               | 1.0 M $\text{H}_2\text{SO}_4$  | $< 2 \text{ h}$ at $10 \text{ mA cm}^{-2}_{\text{geo}}$ (LT)                    | <sup>12</sup> |
| NiCe                                                  | Electrodeposition     | $1.12 \pm 0.01^a$                                  | $< 0.01$                                                                           | NA                                                                               | 1.0 M $\text{H}_2\text{SO}_4$  | $< 2 \text{ h}$ at $10 \text{ mA cm}^{-2}_{\text{geo}}$ (LT)                    | <sup>12</sup> |
| NiCo-(b)                                              | Electrodeposition     | $1.13 \pm 0.01^a$                                  | $< 0.01$                                                                           | NA                                                                               | 1.0 M $\text{H}_2\text{SO}_4$  | $< 2 \text{ h}$ at $10 \text{ mA cm}^{-2}_{\text{geo}}$ (LT)                    | <sup>12</sup> |
| NiCo-(c)                                              | Electrodeposition     | $1.12 \pm 0.01^a$                                  | $< 0.01$                                                                           | NA                                                                               | 1.0 M $\text{H}_2\text{SO}_4$  | $< 2 \text{ h}$ at $10 \text{ mA cm}^{-2}_{\text{geo}}$ (LT)                    | <sup>12</sup> |
| NiCr                                                  | Electrodeposition     | $1.12 \pm 0.01^a$                                  | $< 0.01$                                                                           | NA                                                                               | 1.0 M $\text{H}_2\text{SO}_4$  | $< 2 \text{ h}$ at $10 \text{ mA cm}^{-2}_{\text{geo}}$ (LT)                    | <sup>12</sup> |
| NiCu                                                  | Electrodeposition     | $1.12 \pm 0.02^a$                                  | $< 0.01$                                                                           | NA                                                                               | 1.0 M $\text{H}_2\text{SO}_4$  | $< 2 \text{ h}$ at $10 \text{ mA cm}^{-2}_{\text{geo}}$ (LT)                    | <sup>12</sup> |
| NiFe-(b)                                              | Electrodeposition     | $1.12 \pm 0.01^a$                                  | $< 0.01$                                                                           | NA                                                                               | 1.0 M $\text{H}_2\text{SO}_4$  | $< 2 \text{ h}$ at $10 \text{ mA cm}^{-2}_{\text{geo}}$ (LT)                    | <sup>12</sup> |
| NiFe-(c)                                              | Electrodeposition     | $1.12 \pm 0.01^a$                                  | $< 0.01$                                                                           | NA                                                                               | 1.0 M $\text{H}_2\text{SO}_4$  | $< 2 \text{ h}$ at $10 \text{ mA cm}^{-2}_{\text{geo}}$ (LT)                    | <sup>12</sup> |
| NiLa                                                  | Electrodeposition     | $1.12 \pm 0.01^a$                                  | $< 0.01$                                                                           | NA                                                                               | 1.0 M $\text{H}_2\text{SO}_4$  | $< 2 \text{ h}$ at $10 \text{ mA cm}^{-2}_{\text{geo}}$ (LT)                    | <sup>12</sup> |
| NiMoFe-(b)                                            | Electrodeposition     | $1.12 \pm 0.04^a$                                  | $< 0.01$                                                                           | NA                                                                               | 1.0 M $\text{H}_2\text{SO}_4$  | $< 2 \text{ h}$ at $10 \text{ mA cm}^{-2}_{\text{geo}}$ (LT)                    | <sup>12</sup> |
| NiSn-(b)                                              | Electrodeposition     | $1.17 \pm 0.07^a$                                  | $< 0.01$                                                                           | NA                                                                               | 1.0 M $\text{H}_2\text{SO}_4$  | $< 2 \text{ h}$ at $10 \text{ mA cm}^{-2}_{\text{geo}}$ (LT)                    | <sup>12</sup> |
| $\text{Mn}_{0.9}\text{Nb}_{0.1}\text{O}_2$            | Wet impregnation      | 0.87                                               | 0.012                                                                              | NA                                                                               | 0.5 M $\text{H}_2\text{SO}_4$  | NA                                                                              | <sup>21</sup> |
| $\text{Mn}_{0.9}\text{Nb}_{0.1}\text{O}_2:10\text{F}$ | Wet impregnation      | 0.82                                               | 0.012                                                                              | NA                                                                               | 0.5 M $\text{H}_2\text{SO}_4$  | NA                                                                              | <sup>21</sup> |
| $\text{Mn}_{0.8}\text{Nb}_{0.2}\text{O}_2:10\text{F}$ | Wet impregnation      | 0.68                                               | 0.016                                                                              | NA                                                                               | 0.5 M $\text{H}_2\text{SO}_4$  | 25 h at 1.9 V vs. RHE (OT)<br>$j$ from 8 to $5 \text{ mA cm}^{-2}_{\text{geo}}$ | <sup>21</sup> |
| $(\text{Mn}_{0.8}\text{Nb}_{0.2})\text{O}_2$          | Wet impregnation      | 0.77                                               | 0.014                                                                              | NA                                                                               | 0.5 M $\text{H}_2\text{SO}_4$  | 25 h at 1.9 V vs. RHE (OT)<br>$j$ from 6 to $3 \text{ mA cm}^{-2}_{\text{geo}}$ | <sup>21</sup> |
| $\text{Ni}_{0.5}\text{Mn}_{0.5}\text{O}_y$            | Sputtering            | 0.7                                                | NA                                                                                 | NA                                                                               | 1.0 M $\text{H}_2\text{SO}_4$  | $< 10 \text{ min}$ at $10 \text{ mA cm}^{-2}_{\text{geo}}$ (LT)                 | <sup>22</sup> |

|                                                                      |                                           |                                                              |    |      |                                       |                                                                                                                                        |    |
|----------------------------------------------------------------------|-------------------------------------------|--------------------------------------------------------------|----|------|---------------------------------------|----------------------------------------------------------------------------------------------------------------------------------------|----|
| Ni <sub>0.5</sub> Mn <sub>0.5</sub> Sb <sub>1.7</sub> O <sub>y</sub> | Sputtering                                | 0.672 ± 0.009 <sup>a</sup>                                   | NA | < 10 | 1.0 M H <sub>2</sub> SO <sub>4</sub>  | 168 h at 10 mA cm <sup>-2</sup> <sub>geo</sub> (OT)<br>η from 672 to 735 mV                                                            | 22 |
| Co <sub>3</sub> O <sub>4</sub>                                       | Electron-beam evaporation                 | 0.57                                                         | NA | NA   | 0.5 M H <sub>2</sub> SO <sub>4</sub>  | 15 h at 10 mA cm <sup>-2</sup> <sub>geo</sub> (LT)                                                                                     | 23 |
| Amorphous Ti:MnO <sub>2</sub>                                        | Sputtering deposition                     | > 0.67                                                       | NA | NA   | 0.5 M H <sub>2</sub> SO <sub>4</sub>  | 2 h at 1.9 V vs. RHE (OT)<br>j from 7.2 to 6 mA cm <sup>-2</sup> <sub>geo</sub>                                                        | 24 |
| Amorphous CoMnO <sub>x</sub>                                         | Electrodeposition                         | ~ 0.77 <sup>b</sup>                                          | NA | NA   | pH 2.0 in Pi                          | < 1 h at 1 mA cm <sup>-2</sup> <sub>geo</sub> (LT)                                                                                     | 15 |
| Amorphous CoFePbO <sub>x</sub>                                       | Electrodeposition                         | ~ 0.77 <sup>b</sup>                                          | NA | NA   | pH 2.0 in Pi                          | 50 h at 1 mA cm <sup>-2</sup> <sub>geo</sub> (OT)<br>Operation time                                                                    | 15 |
| Amorphous CoPbO <sub>x</sub>                                         | Electrodeposition                         | ~ 0.62 <sup>b</sup>                                          | NA | NA   | pH 2.5 in Pi                          | < 8 h at 1 mA cm <sup>-2</sup> <sub>geo</sub> (LT)                                                                                     | 15 |
| Amorphous CoFeO <sub>x</sub>                                         | Electrodeposition                         | ~ 0.62 <sup>b</sup>                                          | NA | NA   | pH 2.0 in Pi                          | < 2 h at 1 mA cm <sup>-2</sup> <sub>geo</sub> (LT)                                                                                     | 15 |
| MnO <sub>x</sub> birnessite                                          | Electrodeposition                         | NA                                                           | NA | NA   | pH 1.0 in Pi                          | NA                                                                                                                                     | 25 |
| Activated MnO <sub>x</sub>                                           | Voltage cycling<br>Electrodeposition      | ~ 0.69 <sup>b</sup>                                          | NA | NA   | pH 2.5 in Pi                          | 8 h at 0.1 mA cm <sup>-2</sup> <sub>geo</sub> (OT)                                                                                     | 26 |
| Co-Fe Prussian blue-type films                                       | Hydrothermal synthesis                    | 0.688                                                        | NA | < 10 | pH 2.0 in Pi                          | 12 h at 0.3 mA cm <sup>-2</sup> <sub>geo</sub> (OT)                                                                                    | 27 |
| Ba[Co-POM]                                                           | Metathesis                                | 0.5 <sup>c</sup>                                             | NA | NA   | 0.5 M H <sub>2</sub> SO <sub>4</sub>  | 0.5 h at 10 mA cm <sup>-2</sup> <sub>geo</sub> (OT)                                                                                    | 28 |
| Cs[Co-POM]                                                           | Metathesis                                | 0.52 <sup>c</sup>                                            | NA | NA   | 0.5 M H <sub>2</sub> SO <sub>4</sub>  | 0.5 h at 10 mA cm <sup>-2</sup> <sub>geo</sub> (OT)                                                                                    | 28 |
| Ni <sub>2</sub> Ta                                                   | Solid-state reactions                     | 0.57                                                         | NA | NA   | 0.5 M H <sub>2</sub> SO <sub>4</sub>  | 66 h at 10 mA cm <sup>-2</sup> <sub>geo</sub> (OT)<br>FE ~ 85%                                                                         | 29 |
| MnMoCoO                                                              | Electrodeposition on IrO <sub>2</sub> /Ti | 0.305 <sup>d</sup> at 100 mA cm <sup>-2</sup> <sub>geo</sub> | NA | NA   | 2 M H <sub>2</sub> SO <sub>4</sub>    | NA                                                                                                                                     | 30 |
| Co <sub>0.05</sub> Fe <sub>0.95</sub> O <sub>y</sub> on Ti foil      | Spray-pyrolysis                           | 0.65                                                         | NA | ~30  | pH 0.3 H <sub>2</sub> SO <sub>4</sub> | 50 h at 10 mA cm <sup>-2</sup> <sub>geo</sub> (LT)                                                                                     | 31 |
| Co <sub>0.05</sub> Fe <sub>0.95</sub> O <sub>y</sub> on Ti foil      | Spray-pyrolysis                           | 0.65                                                         | NA | ~30  | pH 2 H <sub>2</sub> SO <sub>4</sub>   | 85 h at 10 mA cm <sup>-2</sup> <sub>geo</sub> (LT)                                                                                     | 31 |
| c-Fe <sub>2</sub> O <sub>3</sub>                                     | Spray-pyrolysis                           | 0.65                                                         | NA | NA   | pH 0.3 H <sub>2</sub> SO <sub>4</sub> | 24 h at 10 mA cm <sup>-2</sup> <sub>geo</sub> (OT)                                                                                     | 32 |
| m-Fe <sub>2</sub> O <sub>3</sub>                                     | Spray-pyrolysis                           | ~0.62                                                        | NA | NA   | pH 0.3 H <sub>2</sub> SO <sub>4</sub> | 6 h at 10 mA cm <sup>-2</sup> <sub>geo</sub> (LT)                                                                                      | 32 |
| Ni <sub>4</sub> Fe <sub>3</sub> S <sub>8</sub> -1000                 | Coprecipitation                           | 0.54                                                         | NA | NA   | 0.5 M H <sub>2</sub> SO <sub>4</sub>  | NA                                                                                                                                     | 33 |
| CoFePbO <sub>x</sub> on Pt/Ti mesh                                   | Electrodeposition                         | 0.7 at 500 mA cm <sup>-2</sup> <sub>geo</sub> , 60-80°C      | NA | NA   | pH 0 H <sub>2</sub> SO <sub>4</sub>   | 7 h at 500 mA cm <sup>-2</sup> <sub>geo</sub> (OT)                                                                                     | 34 |
| CoFePbO <sub>x</sub> on Pt/Ti mesh                                   | Electrodeposition                         | ~0.7 at 10 mA cm <sup>-2</sup> <sub>geo</sub> , 23 °C        | NA | ~30  | pH 0 H <sub>2</sub> SO <sub>4</sub>   | 14 h at 10 mA cm <sup>-2</sup> <sub>geo</sub> (OT)                                                                                     | 34 |
| Ag-doped Co <sub>3</sub> O <sub>4</sub> on FTO                       | Electrodeposition                         | 0.68                                                         | NA | ~12  | 0.5 M H <sub>2</sub> SO <sub>4</sub>  | 10 h at 6.5 mA cm <sup>-2</sup> <sub>geo</sub> (OT)                                                                                    | 35 |
| Co <sub>3</sub> (PO <sub>4</sub> ) <sub>2</sub>                      | Electrodeposition                         | ~0.97 V at 1.8 mA cm <sup>-2</sup> <sub>geo</sub>            | NA | NA   | 1 M H <sub>3</sub> PO <sub>4</sub>    | 30 h at 1.8 mA cm <sup>-2</sup> <sub>geo</sub> (OT)                                                                                    | 36 |
| NiFeP                                                                | Melting spinning                          | 0.54                                                         | NA | NA   | 0.05 M H <sub>2</sub> SO <sub>4</sub> | 30 h at 10 mA cm <sup>-2</sup> <sub>geo</sub> (OT)                                                                                     | 37 |
| F-doped Cu <sub>1.5</sub> Mn <sub>1.5</sub> O <sub>4</sub>           | Ball milling                              | 0.32                                                         | NA | NA   | pH 0.3 H <sub>2</sub> SO <sub>4</sub> | 24 h at 16 mA cm <sup>-2</sup> <sub>geo</sub> (OT)                                                                                     | 38 |
| 1T-MoS <sub>2</sub>                                                  | Sonication of MoO <sub>2</sub>            | 0.42                                                         | NA | NA   | pH 0.3 H <sub>2</sub> SO <sub>4</sub> | 2 h at 10 mA cm <sup>-2</sup> <sub>geo</sub> (OT)                                                                                      | 39 |
| Surface-modified Ni 42 steel sheet                                   | Electro-oxidation in LiOH electrolyte     | 0.552                                                        | NA | NA   | pH 1 H <sub>2</sub> SO <sub>4</sub>   | 42 h at 10 mA cm <sup>-2</sup> <sub>geo</sub> (OT)                                                                                     | 40 |
| Mn <sub>x</sub> Sb <sub>1-x</sub> O <sub>z</sub>                     | Magnetron co-sputtering                   | 0.58 at 50 mA cm <sup>-2</sup> <sub>geo</sub>                | NA | NA   | 1 M H <sub>2</sub> SO <sub>4</sub>    | 28 h at 1.72 V vs. RHE (OT)<br>j from 7.2 to 6 mA cm <sup>-2</sup> <sub>geo</sub><br>2 h at 10 mA cm <sup>-2</sup> <sub>geo</sub> (OT) | 41 |
| Spinel Co <sub>2</sub> TiO <sub>4</sub>                              | Coprecipitation                           | 0.513                                                        | NA | NA   | 0.5 M H <sub>2</sub> SO <sub>4</sub>  | 10 h at 1.79 V vs. RHE (OT)<br>j from 10 to 5 mA cm <sup>-2</sup> <sub>geo</sub>                                                       | 42 |
| Cu <sub>1.5</sub> Mn <sub>1.5</sub> O <sub>4</sub> -200              | High energy mechanical milling            | 0.324                                                        | NA | NA   | 0.5 M H <sub>2</sub> SO <sub>4</sub>  | 20 h at 1.55 V vs. RHE (OT)<br>j from ~10 to 1.5 mA cm <sup>-2</sup> <sub>geo</sub>                                                    | 43 |
| Cu <sub>1.5</sub> Mn <sub>1.5</sub> O <sub>4</sub> -800              | High energy mechanical milling            | 0.352                                                        | NA | NA   | 0.5 M H <sub>2</sub> SO <sub>4</sub>  | 20 h at 1.55 V vs. RHE (OT)<br>j from ~3.2 to 2.8 mA cm <sup>-2</sup> <sub>geo</sub>                                                   | 43 |

<sup>a</sup>Overpotential after 2 h of electrolysis at 10 mA cm<sup>-2</sup><sub>geo</sub>.

<sup>b</sup>Estimated from overpotential at 1 mA cm<sup>-2</sup><sub>geo</sub> and Tafel slope values.

<sup>c</sup>Overpotential after 0.5 h of electrolysis at 10 mA cm<sup>-2</sup><sub>geo</sub>. The overpotential for the same current density in the LSV is smaller at 0.35 V.

The reported stability is also shown as either operation time (OT, time length of electrolysis) or lifetime (LT, time until deactivation).

Pi: phosphate additive; FE: Faradaic efficiency;

<sup>d</sup>The authors suspect that the reported currents are not due to OER of MnMoCoO, but OER of the highly active IrO<sub>2</sub>/Ti substrate.<sup>30</sup>

1 **Supplementary Table 15. Numerical data for the Ir- and Ru-based OER catalysts in**  
 2 **Supplementary Figure 26.**

| Catalyst                                        | Catalyst loading<br>(mg cm <sup>-2</sup> <sub>geo</sub> ) | Electrolyte                          | Overpotential for 10<br>mA cm <sup>-2</sup> <sub>geo</sub> (V) | Mass activity at 10 mA<br>cm <sup>-2</sup> <sub>geo</sub> (A mg <sup>-1</sup> ) | Ref | Notes           |
|-------------------------------------------------|-----------------------------------------------------------|--------------------------------------|----------------------------------------------------------------|---------------------------------------------------------------------------------|-----|-----------------|
| K <sub>x=0.25</sub> IrO <sub>2</sub>            | 0.20                                                      | 0.1 M HClO <sub>4</sub>              | 0.35                                                           | 0.05                                                                            | 44  |                 |
| 3×RuO <sub>2</sub> @SiO <sub>2</sub> [250]      | 0.75                                                      | 3 M H <sub>2</sub> SO <sub>4</sub>   | 0.30                                                           | 0.01                                                                            | 45  |                 |
| 3×RuO <sub>2</sub> @SiO <sub>2</sub> [300]      | 0.75                                                      | 3 M H <sub>2</sub> SO <sub>4</sub>   | 0.31                                                           | 0.01                                                                            | 45  |                 |
| 1×RuO <sub>2</sub> @C@SiO <sub>2</sub> [300/Ar] | 0.43                                                      | 3 M H <sub>2</sub> SO <sub>4</sub>   | 0.28                                                           | 0.02                                                                            | 45  |                 |
| 2×RuO <sub>2</sub> @C@SiO <sub>2</sub> [300/Ar] | 0.74                                                      | 3 M H <sub>2</sub> SO <sub>4</sub>   | 0.27                                                           | 0.01                                                                            | 45  |                 |
| 2×RuO <sub>2</sub> @C@SiO <sub>2</sub> [350/Ar] | 0.72                                                      | 3 M H <sub>2</sub> SO <sub>4</sub>   | 0.27                                                           | 0.01                                                                            | 45  |                 |
| IrNi NCs                                        | 0.01                                                      | 0.1 M HClO <sub>4</sub>              | 0.28                                                           | 0.80                                                                            | 46  |                 |
| IrO <sub>x</sub> -Ir                            | 0.13                                                      | 0.5 M H <sub>2</sub> SO <sub>4</sub> | 0.29                                                           | 0.08                                                                            | 47  |                 |
| Ir-black                                        | 0.13                                                      | 0.5 M H <sub>2</sub> SO <sub>4</sub> | 0.33                                                           | 0.08                                                                            | 47  |                 |
| Bi <sub>2</sub> Ir <sub>2</sub> O <sub>7</sub>  | 0.40                                                      | 1 M H <sub>2</sub> SO <sub>4</sub>   | 0.36                                                           | 0.02                                                                            | 48  |                 |
| Ir-nano 99.8-P                                  | 0.06                                                      | 0.5 M H <sub>2</sub> SO <sub>4</sub> | 0.29                                                           | 0.16                                                                            | 49  | m <sub>Ir</sub> |
| Ir-nano 99.8                                    | 0.06                                                      | 0.5 M H <sub>2</sub> SO <sub>4</sub> | 0.32                                                           | 0.16                                                                            | 49  | m <sub>Ir</sub> |
| Ir-nano 99.5                                    | 0.06                                                      | 0.5 M H <sub>2</sub> SO <sub>4</sub> | 0.33                                                           | 0.16                                                                            | 49  | m <sub>Ir</sub> |
| Ir-black UC                                     | 0.06                                                      | 0.5 M H <sub>2</sub> SO <sub>4</sub> | 0.34                                                           | 0.16                                                                            | 49  | m <sub>Ir</sub> |
| Ir-nano 99.5/CTAB                               | 0.06                                                      | 0.5 M H <sub>2</sub> SO <sub>4</sub> | 0.35                                                           | 0.16                                                                            | 49  | m <sub>Ir</sub> |
| IrO <sub>2</sub> -RuO <sub>2</sub> @Ru (3:1)    | 0.38                                                      | 0.5 M H <sub>2</sub> SO <sub>4</sub> | 0.28                                                           | 0.03                                                                            | 50  |                 |
| IrO <sub>2</sub> -RuO <sub>2</sub> @Ru (3:1)    | 0.28                                                      | 0.5 M H <sub>2</sub> SO <sub>4</sub> | 0.29                                                           | 0.04                                                                            | 50  |                 |
| IrO <sub>2</sub> -RuO <sub>2</sub> @Ru (3:1)    | 0.18                                                      | 0.5 M H <sub>2</sub> SO <sub>4</sub> | 0.30                                                           | 0.06                                                                            | 50  |                 |
| IrO <sub>2</sub> -RuO <sub>2</sub> @Ru (3:1)    | 0.10                                                      | 0.5 M H <sub>2</sub> SO <sub>4</sub> | 0.32                                                           | 0.10                                                                            | 50  |                 |
| IrO <sub>2</sub> -RuO <sub>2</sub> @Ru (3:1)    | 0.08                                                      | 0.5 M H <sub>2</sub> SO <sub>4</sub> | 0.32                                                           | 0.13                                                                            | 50  |                 |
| IrO <sub>2</sub>                                | 0.38                                                      | 0.5 M H <sub>2</sub> SO <sub>4</sub> | 0.32                                                           | 0.03                                                                            | 50  |                 |
| IrO <sub>2</sub> -RuO <sub>2</sub> @Ru (1:1)    | 0.38                                                      | 0.5 M H <sub>2</sub> SO <sub>4</sub> | 0.31                                                           | 0.03                                                                            | 50  |                 |
| IrO <sub>2</sub> -RuO <sub>2</sub> @Ru (2:1)    | 0.38                                                      | 0.5 M H <sub>2</sub> SO <sub>4</sub> | 0.30                                                           | 0.03                                                                            | 50  |                 |
| IrO <sub>2</sub> -RuO <sub>2</sub> @Ru (3:1)    | 0.38                                                      | 0.5 M H <sub>2</sub> SO <sub>4</sub> | 0.28                                                           | 0.03                                                                            | 50  |                 |
| IrO <sub>2</sub> -RuO <sub>2</sub> @Ru (4:1)    | 0.38                                                      | 0.5 M H <sub>2</sub> SO <sub>4</sub> | 0.30                                                           | 0.03                                                                            | 50  |                 |
| IrO <sub>2</sub>                                | 0.38                                                      | 0.5 M H <sub>2</sub> SO <sub>4</sub> | 0.32                                                           | 0.03                                                                            | 50  |                 |
| Ir <sub>3</sub> RuO <sub>2</sub>                | 0.38                                                      | 0.5 M H <sub>2</sub> SO <sub>4</sub> | 0.29                                                           | 0.03                                                                            | 50  |                 |
| IrO <sub>2</sub> (CM)                           | 0.38                                                      | 0.5 M H <sub>2</sub> SO <sub>4</sub> | 0.32                                                           | 0.03                                                                            | 50  |                 |
| RuO <sub>2</sub> (CM)                           | 0.38                                                      | 0.5 M H <sub>2</sub> SO <sub>4</sub> | 0.29                                                           | 0.03                                                                            | 50  |                 |
| IrOOH nanosheet                                 | 0.20                                                      | 0.1 M HClO <sub>4</sub>              | 0.34                                                           | 0.05                                                                            | 51  |                 |
| IrOOH, bulk                                     | 0.20                                                      | 0.1 M HClO <sub>4</sub>              | 0.43                                                           | 0.05                                                                            | 51  |                 |
| IrO <sub>2</sub> bulk                           | 0.20                                                      | 0.1 M HClO <sub>4</sub>              | 0.42                                                           | 0.05                                                                            | 51  |                 |
| r-IrO <sub>2</sub> NP                           | 0.05                                                      | 0.1 M HClO <sub>4</sub>              | 0.44                                                           | 0.20                                                                            | 52  |                 |
| r-RuO <sub>2</sub> NP                           | 0.05                                                      | 0.1 M HClO <sub>4</sub>              | 0.45                                                           | 0.20                                                                            | 52  |                 |



|                                                          |      |                                      |      |      |    |                    |
|----------------------------------------------------------|------|--------------------------------------|------|------|----|--------------------|
| 6H-SrIrO <sub>3</sub>                                    | 0.90 | 0.5 M H <sub>2</sub> SO <sub>4</sub> | 0.25 | 0.01 | 53 |                    |
| 3C-SrIrO <sub>3</sub>                                    | 0.90 | 0.5 M H <sub>2</sub> SO <sub>4</sub> | 0.27 | 0.01 | 53 |                    |
| IrO <sub>2</sub>                                         | 0.90 | 0.5 M H <sub>2</sub> SO <sub>4</sub> | 0.30 | 0.01 | 53 |                    |
| Cr <sub>0.6</sub> Ru <sub>0.4</sub> O <sub>2</sub> (550) | 0.28 | 0.5 M H <sub>2</sub> SO <sub>4</sub> | 0.18 | 0.04 | 54 |                    |
| Ru <sub>1</sub> -Pt <sub>3</sub> Cu                      | 0.02 | 0.1 M HClO <sub>4</sub>              | 0.22 | 0.61 | 55 | m <sub>Pt+Ru</sub> |
| Ru <sub>1</sub> -PtCu                                    | 0.02 | 0.1 M HClO <sub>4</sub>              | 0.25 | 0.61 | 55 | m <sub>Pt+Ru</sub> |
| Cu@Ru <sub>1</sub> -PtCu <sub>3</sub>                    | 0.02 | 0.1 M HClO <sub>4</sub>              | 0.28 | 0.61 | 55 | m <sub>Pt+Ru</sub> |

The data in the table was originally summarized by Kibsgaard and Chorkendorff (ref. <sup>13</sup>).  
m<sub>Ir</sub> and m<sub>Pt+Ru</sub> denote the masses of the metals Ir and Pt+Ru of the catalysts reported in the literature, respectively.

1

1 **Supplementary Table 16. Numerical data for non-noble metal catalysts in Supplementary**  
 2 **Figure 26.**

| No <sup>a</sup> | Catalyst                                                      | Catalyst loading<br>(mg cm <sup>-2</sup> <sub>geo</sub> ) | Electrolyte                          | $\eta$ (V) at 10<br>mA cm <sup>-2</sup> <sub>geo</sub> | Mass activity (A mg <sup>-1</sup> )<br>at 10 mA cm <sup>-2</sup> <sub>geo</sub> | Mass stability <sup>d</sup><br>(h mg <sup>-1</sup> )   | Ref | Notes <sup>e</sup> |
|-----------------|---------------------------------------------------------------|-----------------------------------------------------------|--------------------------------------|--------------------------------------------------------|---------------------------------------------------------------------------------|--------------------------------------------------------|-----|--------------------|
| This work       | Co <sub>2</sub> MnO <sub>4</sub> /FTO                         | 5.00                                                      | pH 1 H <sub>2</sub> SO <sub>4</sub>  | 0.395                                                  | 0.002                                                                           | 64 (LT)<br>at 100 mA cm <sup>-2</sup> <sub>geo</sub>   |     | m <sub>Co</sub>    |
| This work       | Co <sub>2</sub> MnO <sub>4</sub> /FTO                         | 2.50                                                      | pH 1 H <sub>2</sub> SO <sub>4</sub>  | 0.405                                                  | 0.005                                                                           | 98 (LT)<br>at 100 mA cm <sup>-2</sup> <sub>geo</sub>   |     | m <sub>Co</sub>    |
| This work       | Co <sub>2</sub> MnO <sub>4</sub> /FTO                         | 1.00                                                      | pH 1 H <sub>2</sub> SO <sub>4</sub>  | 0.415                                                  | 0.01                                                                            | 171 (LT)<br>at 100 mA cm <sup>-2</sup> <sub>geo</sub>  |     | m <sub>Co</sub>    |
| This work       | Co <sub>2</sub> MnO <sub>4</sub> /FTO                         | 0.50                                                      | pH 1 H <sub>2</sub> SO <sub>4</sub>  | 0.423                                                  | 0.02                                                                            | 208 (LT)<br>at 100 mA cm <sup>-2</sup> <sub>geo</sub>  |     | m <sub>Co</sub>    |
| This work       | Co <sub>2</sub> MnO <sub>4</sub> /FTO                         | 0.20                                                      | pH 1 H <sub>2</sub> SO <sub>4</sub>  | 0.443                                                  | 0.05                                                                            | 194 (LT)<br>at 100 mA cm <sup>-2</sup> <sub>geo</sub>  |     | m <sub>Co</sub>    |
| This work       | Co <sub>2</sub> MnO <sub>4</sub> /FTO                         | 0.10                                                      | pH 1 H <sub>2</sub> SO <sub>4</sub>  | 0.433                                                  | 0.1                                                                             | 190 (LT)<br>at 100 mA cm <sup>-2</sup> <sub>geo</sub>  |     | m <sub>Co</sub>    |
| 1               | Mn <sub>0.67</sub> Sb <sub>0.33</sub> O <sub>z</sub>          | 0.12                                                      | 1 M H <sub>2</sub> SO <sub>4</sub>   | 0.51                                                   | 0.084                                                                           | 17 (OT)<br>at 10 mA cm <sup>-2</sup> <sub>geo</sub>    | 41  | m <sub>Mn</sub>    |
| 2               | Spinel Co <sub>2</sub> TiO <sub>4</sub>                       | 0.16 <sup>b</sup>                                         | 0.5 M H <sub>2</sub> SO <sub>4</sub> | 0.51                                                   | 0.063 <sup>b</sup>                                                              | 62.5 (OT)<br>at <10 mA cm <sup>-2</sup> <sub>geo</sub> | 42  |                    |
| 3               | Ni <sub>4</sub> Fe <sub>5</sub> S <sub>8</sub> -1000          | 0.40                                                      | 0.5 M H <sub>2</sub> SO <sub>4</sub> | 0.54                                                   | 0.025                                                                           | NA                                                     | 33  |                    |
| 4               | c-Fe <sub>2</sub> O <sub>3</sub>                              | 1.00                                                      | 0.5 M H <sub>2</sub> SO <sub>4</sub> | 0.65                                                   | 0.010                                                                           | 24 (LT)<br>at 10 mA cm <sup>-2</sup> <sub>geo</sub>    | 32  |                    |
| 5               | Co <sub>0.05</sub> Fe <sub>0.95</sub> O <sub>y</sub> /Ti foil | 1.00                                                      | pH 2                                 | 0.65                                                   | 0.010                                                                           | 85 (LT)<br>at 10 mA cm <sup>-2</sup> <sub>geo</sub>    | 31  |                    |
| 6               | Mn <sub>0.8</sub> Nb <sub>0.2</sub> O <sub>2</sub> :10F       | 0.30                                                      | 0.5 M H <sub>2</sub> SO <sub>4</sub> | 0.68                                                   | 0.030                                                                           | 83 (OT)<br>at <10 mA cm <sup>-2</sup> <sub>geo</sub>   | 21  |                    |
| 7               | Co-Fe Prussian<br>blue-type films                             | 0.30                                                      | pH 2.0 with Pi                       | 0.69                                                   | 0.033                                                                           | NA                                                     | 27  | m <sub>Co+Fe</sub> |
| 8               | Ba[Co-POM]                                                    | 11.20                                                     | 0.5 M H <sub>2</sub> SO <sub>4</sub> | 0.50 <sup>c</sup>                                      | < 0.001                                                                         | 0.04 (OT)<br>at 10 mA cm <sup>-2</sup> <sub>geo</sub>  | 28  | m <sub>Co</sub>    |
| 9               | Cs[Co-POM]                                                    | 12.10                                                     | 0.5 M H <sub>2</sub> SO <sub>4</sub> | 0.52 <sup>c</sup>                                      | < 0.001                                                                         | 0.04 (OT)<br>at 10 mA cm <sup>-2</sup> <sub>geo</sub>  | 28  | m <sub>Co</sub>    |

<sup>a</sup>No 1-9 correspond to data points 1-9 in Supplementary Fig. 26, respectively.

<sup>b</sup>Estimated from figure 2 in ref <sup>42</sup>.

<sup>c</sup>Overpotential after 0.5 h of electrolysis at 10 mA cm<sup>-2</sup><sub>geo</sub>. The overpotential for the same current density in the LSV is much smaller at 0.35 V.

<sup>d</sup>The mass stability was calculated by Operation time (OT) or Lifetime (LT) divided by catalyst loading. The lifetime stability test for Co<sub>2</sub>MnO<sub>4</sub>/FTO were present in Supplementary Fig. 48.

<sup>e</sup>m<sub>Mn</sub>, m<sub>Co+Fe</sub> and m<sub>Co</sub> denote the masses of the metals Mn, Co+Fe and Co of the catalysts reported in the literature, respectively.

3

1 **Supplementary Table 17. Adsorption free energies for OH\*, OOH\* and O\*.**

2 Adsorption free energies for OH\* OOH\* and O\* on different surfaces<sup>#</sup>.

|                                          | $G_{ad}$ OH* | $G_{ad}$ OOH* | $G_{ad}$ O* |
|------------------------------------------|--------------|---------------|-------------|
| CoMn <sub>2</sub> O <sub>4</sub> (100)   | -0.25        | 2.71          | 0.39        |
| CoMn <sub>2</sub> O <sub>4</sub> (311)   | 0.61         | 3.91          | 1.54        |
| Co <sub>2</sub> MnO <sub>4</sub> (100)-A | -0.52        | 2.86          | 0.30        |
| Co <sub>2</sub> MnO <sub>4</sub> (100)-B | 0.31         | 3.46          | 1.78        |
| Co <sub>2</sub> MnO <sub>4</sub> (311)-A | 0.52         | 3.54          | 1.86        |
| Co <sub>2</sub> MnO <sub>4</sub> (311)-B | 0.57         | 3.75          | 2.00        |
| Co <sub>3</sub> O <sub>4</sub> (100)-A   | -0.41        | 2.96          | 0.58        |
| Co <sub>3</sub> O <sub>4</sub> (100)-B   | 0.17         | 3.40          | 0.93        |
| Co <sub>3</sub> O <sub>4</sub> (311)-A   | 0.32         | 3.69          | 1.18        |
| Co <sub>3</sub> O <sub>4</sub> (311)-B   | 0.63         | 3.84          | 2.27        |
| λ-MnO <sub>2</sub> (100)                 | 0.90         | 4.13          | 1.00        |
| λ-MnO <sub>2</sub> (311)                 | -0.72        | 2.57          | -0.52       |
| R-MnO <sub>2</sub> (311)-A               | 1.24         | 4.38          | 1.79        |
| R-MnO <sub>2</sub> (311)-B               | -0.03        | 3.06          | 0.07        |
| β-MnO <sub>2</sub> (311)-A               | -0.18        | 3.07          | 0.50        |
| β-MnO <sub>2</sub> (311)-B               | -0.77        | 2.76          | 0.11        |

3 <sup>#</sup> Free energy corrections were conducted for all of the adsorbates and gas molecules. A  
 4 standard correction was applied, including zero-point energy, pressure, inner energy and  
 5 entropy using the following equation:

$$E_{cor} = E_{cor}^{ZPE} + E_{cor}^U + E_{cor}^P + E_{cor}^S \quad (1)$$

6 where  $E_{cor}^{ZPE}$  refers to the correction of zero-point energy,  $E_{cor}^U$  and  $E_{cor}^P$  refer to the correction  
 7 of temperature (inner energy correction) and pressure, respectively, and  $E_{cor}^S$  refers to the  
 8 correction of entropy. The free energy correction for entropy can be separated into transitional  
 9 entropy, rotational entropy and vibrational entropy; however, only vibrational entropy was  
 10 considered for the surface adsorbates, which are only dependent on the vibrational frequency<sup>56</sup>.  
 11 The frequencies for adsorbates were calculated using the finite difference method of VASP in  
 12 this work, and the free energies were corrected to the temperature of 298 K. In addition, the  
 13 free energy corrections were conducted for gas molecules of H<sub>2</sub> and H<sub>2</sub>O with the pressure of  
 14 1.0 and 0.035 bar, respectively. The free energy of O<sub>2</sub>(g) was calculated as:

$$G_{O_2(g)} = 1.23 \text{ eV} \times 4 + 2G_{H_2O(l)} - 2G_{H_2(g)} \quad (2)$$

15 The chemical potential of OH<sup>-</sup> was calculated as:

$$G_{OH^-} = G_{H_2O(l)} - G_{H^+} \quad (3)$$

16 In equilibrium, the chemical potential of a pair of (H<sup>+</sup> + e<sup>-</sup>) at 0 V vs. RHE was referred to  
 17 the ½ chemical potential of H<sub>2</sub> molecules in light of the computational hydrogen electrode  
 18 (CHE) approximation. The solvation effect from explicit model (see Supplementary Table 18)  
 19 has been corrected into the adsorption energies.

1 **Supplementary Table 18. Comparisons of solvent effect with explicit or implicit models.**

2 Comparisons of solvent effect calculated using explicit or implicit models.

| Solvent effect | Explicit model <sup>#</sup><br>(4-layer water) | Implicit model<br>(VASPsol) |
|----------------|------------------------------------------------|-----------------------------|
| O*             | -0.29                                          | -0.22                       |
| OH*            | -0.25                                          | -0.28                       |
| OOH*           | -0.06                                          | -0.10                       |

3 <sup>#</sup> We attempted to correct for the solvation effect on adsorbates due to the formation of H-  
4 bonds, which results in the stabilization of adsorptions<sup>57</sup>. In this work, an explicit 4-layer water  
5 model was first applied on Co<sub>2</sub>MnO<sub>4</sub> (311) surfaces (Supplementary Fig. 52). Molecular  
6 dynamics (MD) simulations were performed for 2000 steps with a timestep of 0.5  
7 femtoseconds. 5 snapshots were selected randomly from the MD simulation and the adsorption  
8 energies with explicit water in the system were calculated. Longer MD simulations were  
9 performed up to 10 ps, and solvent effects calculated by more re-optimized structures were  
10 found to be converged with an error less than 0.05 eV. The average of the calculated adsorption  
11 energies were used, namely, a stabilization for O\*, OH\* and OOH\* was estimated to be 0.29,  
12 0.25 and 0.06 eV, respectively. Considering the uncertainty from the explicit water layer  
13 structure, the solvation effects were also examined based on the implicit model VASPsol<sup>58</sup>  
14 model (Supplementary Table 18), which are comparable with the results of explicit solvation  
15 model.

16

17

- 1 **Supplementary Table 19. Hubbard  $U$  corrections effect on reaction energies.**  
 2 Investigation of the effect from Hubbard  $U$  corrections on reaction energies. The bold  
 3 numbers refer to the  $\Delta G$ -limiting energies ( $\Delta G_{\text{lim}}$ ) at 1.7 V vs. RHE.

|                                                                      | GGA                            |                                  | GGA + $U^{\#}$                 |                                  |
|----------------------------------------------------------------------|--------------------------------|----------------------------------|--------------------------------|----------------------------------|
|                                                                      | Co <sub>3</sub> O <sub>4</sub> | Co <sub>2</sub> MnO <sub>4</sub> | Co <sub>3</sub> O <sub>4</sub> | Co <sub>2</sub> MnO <sub>4</sub> |
| H <sub>2</sub> O(l) + * → OH* + (H <sup>+</sup> + e <sup>-</sup> )   | -1.07                          | -1.13                            | -1.06                          | -1.30                            |
| OH* → O* + (H <sup>+</sup> + e <sup>-</sup> )                        | <b>-0.06</b>                   | -0.27                            | <b>0.01</b>                    | -0.11                            |
| O* + H <sub>2</sub> O(l) → OOH* + (H <sup>+</sup> + e <sup>-</sup> ) | -0.14                          | <b>0.04</b>                      | -0.19                          | <b>0.03</b>                      |
| OOH* → * + O <sub>2</sub> (g) + (H <sup>+</sup> + e <sup>-</sup> )   | -0.62                          | -0.53                            | -0.64                          | -0.49                            |

- 4 <sup>#</sup>  $U$  values (employed as  $U - J$ ) of 4.0 and 2.0 were applied for Mn and Co.  
 5

1 **Supplementary Table 20. Energy changes of Co and Mn sites in CoMn<sub>2</sub>O<sub>4</sub> and**  
 2 **Co<sub>2</sub>MnO<sub>4</sub><sup>#</sup>.**  
 3 Comparisons of energy change between Co and Mn site in CoMn<sub>2</sub>O<sub>4</sub> and Co<sub>2</sub>MnO<sub>4</sub><sup>#</sup>

| U = 1.7 V vs. RHE                                                    | Co-B site                        |                                  | Mn-B site                        |                                  |
|----------------------------------------------------------------------|----------------------------------|----------------------------------|----------------------------------|----------------------------------|
|                                                                      | CoMn <sub>2</sub> O <sub>4</sub> | Co <sub>2</sub> MnO <sub>4</sub> | CoMn <sub>2</sub> O <sub>4</sub> | Co <sub>2</sub> MnO <sub>4</sub> |
| H <sub>2</sub> O(l) + * → OH* + (H <sup>+</sup> + e <sup>-</sup> )   | -1.08                            | -1.13                            | -3.11                            | -2.84                            |
| OH* → O* + (H <sup>+</sup> + e <sup>-</sup> )                        | -0.77                            | -0.27                            | -1.59                            | -1.27                            |
| O* + H <sub>2</sub> O(l) → OOH* + (H <sup>+</sup> + e <sup>-</sup> ) | <b>0.66</b>                      | <b>0.04</b>                      | 1.17                             | 1.06                             |
| OOH* → * + O <sub>2</sub> (g) + (H <sup>+</sup> + e <sup>-</sup> )   | -0.69                            | -0.53                            | <b>1.69</b>                      | <b>1.16</b>                      |

4 <sup>#</sup> The bold numbers refer to the ΔG-limiting energies (ΔG<sub>lim</sub>). Larger ΔG<sub>lim</sub> was obtained on  
 5 Mn site compared with that on the Co site, which indicates that the Co site is more favored as  
 6 the active site for OER.

7  
 8

1 **Supplementary Table 21. Description of the structures with local modifications.**

2 Description of the structures with local modifications

| Structure                                                                 | Description                                                                                                                                                                                                                                                                                 |
|---------------------------------------------------------------------------|---------------------------------------------------------------------------------------------------------------------------------------------------------------------------------------------------------------------------------------------------------------------------------------------|
| <b>Co<sub>2</sub>MnO<sub>4</sub>-A<sub>Co_v</sub></b>                     | The structure describes the Mn-rich surface with a Co vacancy at the spinel A site, which was observed from the Rietveld refinement of the SR-PXRD (Supplementary Figs. 1-3). The OER activity was calculated on the adjacent Co B site ( $E_{ad} OH^* = 0.61$ eV, $E_{ad} O^* = 2.12$ eV). |
| <b>Co<sub>2</sub>MnO<sub>4</sub>-B<sub>Co_v</sub></b>                     | The structure describes the Mn-rich surface with a Co vacancy at the spinel B site as a comparison. The OER activity was calculated on the adjacent Co A site ( $E_{ad} OH^* = 0.83$ eV, $E_{ad} O^* = 2.38$ eV).                                                                           |
| <b>Co<sub>2</sub>MnO<sub>4</sub>-AB<sub>Co_v</sub></b>                    | The structure describes the Mn-rich surface with a Co vacancy at both spinel A and B site as a comparison. The OER activity was calculated on the adjacent Co B site ( $E_{ad} OH^* = 0.75$ eV, $E_{ad} O^* = 2.29$ eV).                                                                    |
| <b>Co<sub>2</sub>MnO<sub>4</sub>-A<sub>Co_v</sub>-bulk</b>                | The structure describes the surface with a Co vacancy at the spinel A site in the bulk phase. The OER activity was tested on Co B-site ( $E_{ad} OH^* = 0.69$ eV, $E_{ad} O^* = 2.10$ eV).                                                                                                  |
| <b>Co<sub>2</sub>MnO<sub>4</sub>-B<sub>3Co1Mn</sub>-perfect</b>           | The structure describes the case with excess Co at the B site (Co/Mn ratio > 1), which was experimentally confirmed in (Supplementary Figs. 1-3 and 7). The OER activity on Co B site was calculated ( $E_{ad} OH^* = 0.60$ eV, $E_{ad} O^* = 2.06$ eV).                                    |
| <b>Co<sub>2</sub>MnO<sub>4</sub>-B<sub>3Co1Mn</sub>- A<sub>Co_v</sub></b> | The structure describes the case of Co <sub>2</sub> MnO <sub>4</sub> -B <sub>3Co1Mn</sub> with the Co vacancy on the spinel A site. The OER activity on Co B site was calculated ( $E_{ad} OH^* = 0.69$ eV, $E_{ad} O^* = 2.17$ eV).                                                        |

3

4

1 **Supplementary Table 22. The degree of rate control analysis.**

2 Degree of rate control analysis describing the effect on the total rate from different  
3 elementary steps or coverages at 1.7 V vs. RHE.

| <b>Reaction<sup>#</sup></b> | <b>R1</b> | <b>R2</b> | <b>R3</b> | <b>R4</b> |
|-----------------------------|-----------|-----------|-----------|-----------|
| <b>R1</b>                   | 2.78E-11  | 9.77E-13  | 1.00E+00  | 1.58E-10  |
| <b>R2</b>                   | 2.78E-11  | 9.77E-13  | 1.00E+00  | 1.58E-10  |
| <b>R3</b>                   | 2.78E-11  | 9.77E-13  | 1.00E+00  | 1.58E-10  |
| <b>R4</b>                   | 2.78E-11  | 9.77E-13  | 1.00E+00  | 1.58E-10  |

  

| <b>Coverage</b> | <b>O*</b> | <b>OH*</b> | <b>OOH*</b> | <b>Free site</b> |
|-----------------|-----------|------------|-------------|------------------|
| <b>R1</b>       | -1.00E+00 | -2.62E-05  | -9.71E-13   | -2.78E-11        |
| <b>R2</b>       | -1.00E+00 | -2.62E-05  | -9.71E-13   | -2.78E-11        |
| <b>R3</b>       | -1.00E+00 | -2.62E-05  | -9.71E-13   | -2.78E-11        |
| <b>R4</b>       | -1.00E+00 | -2.62E-05  | -9.71E-13   | -2.78E-11        |

4 <sup>#</sup> R1-R4 see equations (1)-(4) in main text.

5

6



1 **Supplementary Table 23. Two pathways describing catalyst dissolution reaction with**  
 2 **different priority.**

3 Two pathways describing catalyst dissolution with different priority.

| M-Path     | Elementary steps                                                                                                                                                           |
|------------|----------------------------------------------------------------------------------------------------------------------------------------------------------------------------|
| <b>R'1</b> | Perfect $\rightarrow$ Defect_Co/Mn <sub>vac</sub> + Co/Mn <sup>#</sup>                                                                                                     |
| <b>R'2</b> | Defect_Co/Mn <sub>vac</sub> + H <sub>2</sub> O $\rightarrow$ Defect_(Co/Mn <sub>vac</sub> +O <sub>vac</sub> )-OOH* + (H <sup>+</sup> + e <sup>-</sup> )                    |
| <b>R'3</b> | Defect_(Co/Mn <sub>vac</sub> +O <sub>vac</sub> )-OOH* $\rightarrow$ Defect_(Co/Mn <sub>vac</sub> +O <sub>vac</sub> ) + O <sub>2</sub> + (H <sup>+</sup> + e <sup>-</sup> ) |
| O-Path     | Elementary steps                                                                                                                                                           |
| <b>R'4</b> | Perfect + H <sub>2</sub> O $\rightarrow$ Defect_O <sub>vac</sub> -OOH* + (H <sup>+</sup> + e <sup>-</sup> )                                                                |
| <b>R'5</b> | Defect_O <sub>vac</sub> -OOH* $\rightarrow$ Defect_O <sub>vac</sub> + O <sub>2</sub> + (H <sup>+</sup> + e <sup>-</sup> )                                                  |
| <b>R'6</b> | Defect_O <sub>vac</sub> $\rightarrow$ Defect_(Co/Mn <sub>vac</sub> +O <sub>vac</sub> ) + Co/Mn                                                                             |

4 <sup>#</sup> Co<sup>2+</sup> and MnO<sub>4</sub><sup>-</sup> were considered as the dissolution products, where the energy of Co and  
 5 Mn element were referred to Co<sup>2+</sup> and MnO<sub>4</sub><sup>-</sup>.

6

1 **Supplementary Table 24. Energetic data for the scheme of charge-extrapolation.**

2 Energetic data for the scheme of charge-extrapolation on  $\text{Co}_2\text{MnO}_4$ .

|                                                                                           | $\varphi_{\text{IS}}$ | $\varphi_{\text{TS}}$ | $\varphi_{\text{FS}}$ | $q_{\text{IS}}^{\#}$ | $q_{\text{TS}}$ | $q_{\text{FS}}$ | $E_{\text{TS-IS}}$ | $E_{\text{FS-IS}}$ |
|-------------------------------------------------------------------------------------------|-----------------------|-----------------------|-----------------------|----------------------|-----------------|-----------------|--------------------|--------------------|
| $\text{H}_2\text{O(l)} + * \rightarrow \text{OH}^* + (\text{H}^+ + \text{e}^-)$           | 4.63                  | 3.72                  | 3.68                  | 0.00                 | 0.93            | 0.94            | 0.61               | 0.66               |
| $\text{OH}^* \rightarrow \text{O}^* + (\text{H}^+ + \text{e}^-)$                          | 5.02                  | 3.88                  | 3.79                  | 0.00                 | 0.92            | 0.94            | 1.06               | 1.11               |
| $\text{O}^* + \text{H}_2\text{O(l)} \rightarrow \text{OOH}^* + (\text{H}^+ + \text{e}^-)$ | 4.99                  | 4.20                  | 3.70                  | 0.00                 | 0.63            | 0.92            | 1.19               | 1.18               |
| $\text{OOH}^* \rightarrow * + \text{O}_2(\text{g}) + (\text{H}^+ + \text{e}^-)$           | 4.65                  | 3.99                  | 3.73                  | 0.00                 | 0.85            | 0.89            | 0.34               | 0.14               |

3 <sup>#</sup> The charge transfer in IS was corrected to 0 as a reference.

4

## Supplementary Notes

### Supplementary Note 1. Rietveld analysis

The crystal structures of the as-synthesized  $\text{Co}_2\text{MnO}_4$  and those after electrolysis for 4 h and 23 h were refined with the Rietveld analysis using the RIETAN-FP software.<sup>59</sup> The occupancies of the Co and Mn atoms at the A and B sites in the spinel structure were constrained on the refinements based on the results of the ICP-MS and the XANES measurements.

**Initial values and constraints of the Co and Mn site occupancies on the Rietveld refinements.** When the chemical compositions of the Co and Mn in the analyzed materials are denoted  $x$  and  $y$ , respectively, the formula can be described as  $\text{Co}_x\text{Mn}_y\text{O}_4$ . The Co/Mn ratio was fixed to be 2, that is  $M = x/y = 2$ , based on the ICP-MS results (Supplementary Fig. 4). The average atomic valence of Co and Mn were obtained from the XANES K-edge (Supplementary Figs. 5 and 6). For example, the average valence of the Co and Mn were  $\nu_{\text{Co}} = 2.37$  and  $\nu_{\text{Mn}} = 3.67$  in the as-synthesized material. Since the valency of all the oxygen atoms can be assumed to be -2, the relation among the Co and Mn compositions and valences were described as:

$$\nu_{\text{Co}} \cdot x + \nu_{\text{Mn}} \cdot y = 8 \quad (4)$$

By substitution of  $M = x/y$  we have

$$x = \frac{8M}{M\nu_{\text{Co}} + \nu_{\text{Mn}}} \quad (5)$$

and

$$y = \frac{8}{M\nu_{\text{Co}} + \nu_{\text{Mn}}} \quad (6)$$

The EXAFS data of the Co K-edge indicates that Co is located at both A and B sites, whereas the Mn K-edge indicate that Mn is located only at the B site (Supplementary Fig. 7). In order to reflect this information, we have used the following chemical structure for the EXAFS fitting:

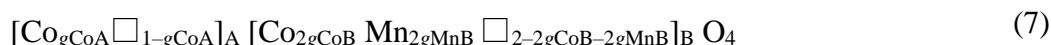

Here,  $\square$  indicates a vacancy.  $g_{\text{CoA}}$ ,  $g_{\text{CoB}}$ , and  $g_{\text{MnB}}$  indicates the occupancy of the A-site Co, the B-site Co, and the B-site Mn. Comparison with the chemical composition  $\text{Co}_x\text{Mn}_y\text{O}_4$  yields:

$$g_{\text{CoA}} + 2g_{\text{CoB}} = x = \frac{8M}{M\nu_{\text{Co}} + \nu_{\text{Mn}}} \quad (8)$$

$$g_{\text{CoA}} 2g_{\text{MnB}} = y = \frac{8}{M\nu_{\text{Co}} + \nu_{\text{Mn}}} \quad (9)$$

The preliminary Rietveld refinements were performed under the assumption  $M = 2$ . When the  $\nu_{\text{Co}}$  and  $\nu_{\text{Mn}}$  values obtained from EXAFS were introduced into equations (8) and (9), the

1 occupancy of the B site exceeded 1 ( $g_{\text{CoB}} + g_{\text{MnB}} > 1$ ) for all 3 samples. This indicates that the  
2 B-site is fully occupied, and therefore, we can assume

$$g_{\text{CoB}} + g_{\text{MnB}} = 1 \quad (10)$$

3 As  $M = 2$ , equations (8) and (9) yield:

$$g_{\text{CoA}} + 2g_{\text{CoB}} = 2 \cdot 2g_{\text{MnB}} \quad (11)$$

4 Based on equations (10) and (11), we obtain the following B-site occupancies:

$$g_{\text{CoB}} = -\frac{1}{6}g_{\text{CoA}} + \frac{2}{3} \quad (12)$$

5 and

$$g_{\text{MnB}} = \frac{1}{6}g_{\text{CoA}} + \frac{1}{3} \quad (13)$$

6 The occupancies of the Co and Mn were constrained with equations (12) and (13) on the  
7 Rietveld refinements in Supplementary figures 1-3. In this analysis, the oxygen occupancy was  
8 fixed to 1 according to the previous literature<sup>60</sup>. The isotropic atomic displacement parameters  
9 of  $\text{Co}_\text{B}$  and  $\text{Mn}_\text{B}$  were constrained to be the same.

10

11

## 1 **Supplementary Note 2. Fitting and Simulation of EXAFS**

2 The XAFS analysis was performed on the Demeter software platform<sup>61</sup>. Fourier transforms  
3 were applied to all the  $k^3$ -weighted Co K-edge EXAFS spectra from  $k = 3 \text{ \AA}^{-1}$  to  $14 \text{ \AA}^{-1}$  to  
4 obtain radial distribution functions with ATHENA software.

5 **Co K-edge EXAFS fitting.** EXAFS fitting in  $R$ -space for the standard  $\text{Co}_3\text{O}_4$  sample was  
6 conducted first with  $R$  range of 1 - 3.5  $\text{ \AA}$  with ARTEMIS software. A CIF file of cubic spinel  
7  $\text{Co}_3\text{O}_4$  (ICSD code 36256) from ICSD, Inorganic Crystal Structure Database, was used as an  
8 initial model. Since Co atoms occupied both A site (Tetrahedral site,  $\text{Co}_A$ ) and B site  
9 (Octahedral site,  $\text{Co}_B$ ), the scattering paths were calculated by running FEFF6 separately by  
10 setting either of A site or B site as an absorber, and paths from both calculations were used for  
11 the fitting. Three representative single-scattering paths for each calculation were included:  
12  $\text{Co}_A$ -O (1st shell),  $\text{Co}_A$ - $\text{Co}_B$ , and  $\text{Co}_A$ - $\text{Co}_A$  for  $\text{Co}_A$  core;  $\text{Co}_B$ -O (1st shell),  $\text{Co}_B$ - $\text{Co}_B$ , and  $\text{Co}_B$ -  
13  $\text{Co}_A$  for  $\text{Co}_B$  core. The amplitude reduction factor,  $S_0^2$ , for these two sites were set to be the  
14 same value and allowed to float. A fractional occupancy factors of 1/3 for A site and 2/3 for B  
15 site were multiplied to separate the contribution from these two sites. The same value of energy  
16 shift  $\Delta E_0$  that aligns the energy grid of the calculation with the energy grid of the data was used  
17 for all the path which is commonly used in the EXAFS fitting<sup>62</sup>. The coordination number for  
18 all the paths were fixed to the crystallography values of spinel structure. The amplitude  
19 reduction factor,  $S_0^2$ , energy shift,  $\Delta E_0$ , the changes in path length from the theoretical values,  
20  $\Delta R$ , and Debye-Waller factors,  $\sigma^2$ , were refined through the fitting process. The final fitting  
21 result and parameters were shown in Supplementary Figure 8 and Table 4.

22 The fitting of  $\text{Co}_2\text{MnO}_4$  was based on the procedure described in the Chapter 15.10. in the  
23 Artemis manual<sup>63</sup>. The initial structure model of  $\text{Co}_2\text{MnO}_4$  were obtained from the Rietveld  
24 refinement result of synchrotron-radiation powder XRD of  $\text{Co}_2\text{MnO}_4$  in Supplementary Table  
25 1. The scattering paths were calculated by running FEFF6 separately by setting either of A site  
26 or B site Co as an absorber, and paths from both calculations were used for the fitting. Four  
27 representative single-scattering paths for each calculation were included:  $\text{Co}_A$ -O (1st shell),  
28  $\text{Co}_A$ - $\text{Co}_B$ ,  $\text{Co}_A$ - $\text{Mn}_B$ , and  $\text{Co}_A$ - $\text{Co}_A$  for  $\text{Co}_A$  core;  $\text{Co}_B$ -O (1st shell),  $\text{Co}_B$ - $\text{Co}_B$ ,  $\text{Co}_B$ - $\text{Mn}_B$ , and  
29  $\text{Co}_B$ - $\text{Co}_A$  for  $\text{Co}_B$  core. The  $S_0^2$  for these two sites were fixed to 0.85, the same value obtained  
30 by fitting of the standard  $\text{Co}_3\text{O}_4$  sample, and multiplied by the appropriate fractional occupancy  
31 elucidated from the Rietveld analysis. Energy shifts,  $\Delta E_0$ , were fixed for all the paths to 1.6 eV,  
32 the value calculated from  $\text{Co}_3\text{O}_4$ . Same  $\Delta R$  and  $\sigma^2$  were used for  $\text{Co}_A$ -O and  $\text{Co}_B$ -O paths, both  
33 of which contributed to the first shell, considering the path lengths were generally too close to  
34 be distinguished by EXAFS. The coordination numbers were allowed to float. For the second  
35 and third shells, single scattering paths of Co-M (M = Co or Mn) were included. The distance  
36 with scattering atoms in octahedral B site was split into  $\text{Co}_B$ - $\text{Co}_B$  and  $\text{Co}_B$ - $\text{Mn}_B$  because the  
37 octahedral site was occupied by both Co and Mn while imposing same distance  $\Delta R$  and Debye-  
38 Waller factor  $\sigma^2$ . Moreover,  $\text{Co}_A$ - $\text{Co}_B$  and  $\text{Co}_B$ - $\text{Co}_A$  scattering path present the same distance.

1 Therefore, same  $\Delta R$  and Debye-Waller factor  $\sigma^2$  were used for these two paths. Finally, the  
2 coordination number for all these paths were fixed to the value calculated by multiplying the  
3 occupancy of scattering atoms to the crystallography values of spinel structure. The fitting  
4 result and parameters were shown in Supplementary Figure 9 and Supplementary Table 6.

5 **Mn K-edge EXAFS fitting.** EXAFS fitting in  $R$ -space for the standard  $\beta$ - $\text{MnO}_2$  sample was  
6 conducted first with  $R$  range of 1-3.5 Å. The single scattering paths of Mn-O, Mn-Mn.1 (second  
7 shell) and Mn-Mn.2 (third shell) were included for fitting. The coordination number for all the  
8 paths were fixed to the crystallography values. The amplitude redactor factor,  $S_0^2$ , energy shift,  
9  $\Delta E_0$ , the changes in path length from the theoretical values,  $\Delta R$ , and Debye-Waller factors,  $\sigma^2$ ,  
10 were refined through the fitting process. The fitting result and parameters were shown in  
11 Supplementary figure 8 and Supplementary Table 5. Obtained value of  $S_0^2$  (0.78) and  $\Delta E_0$  (0.2)  
12 were used for the fitting of Mn K-edge EXAFS of  $\text{Co}_2\text{MnO}_4$ . The scattering paths were  
13 calculated by running FEFF6 by setting Mn in octahedral B site as an absorber. The single  
14 scattering paths of  $\text{Mn}_B\text{-O.1}$  (first shell),  $\text{Mn}_B\text{-Mn}_B$ ,  $\text{Mn}_B\text{-Co}_B$ ,  $\text{Mn}_B\text{-Co}_A$  and  $\text{Mn}_B\text{-O.3}$  (third  
15 shell) were included for the fitting. The distance with scattering atoms in the octahedral B site  
16 was split into  $\text{Mn}_B\text{-Co}_B$  and  $\text{Mn}_B\text{-Mn}_B$  because octahedral site was occupied by both Co and  
17 Mn while imposing same distance  $\Delta R$  and Debye-Waller factor  $\sigma^2$ . The other paths were set  
18 with additional distance  $\Delta R$  and Debye-Waller factor  $\sigma^2$ . The coordination number for  $\text{Mn}_B\text{-}$   
19  $\text{O.1}$  was let free while other paths were fixed to the value calculated by multiplying the  
20 occupancy of scattering atoms to the crystallography value of spinel structure. The fitting result  
21 and parameters were shown in Supplementary Figure 10 and Supplementary Table 7.

22 The parameters of the above fittings were physically reasonable<sup>62</sup> and the  $R$ -factors validates  
23 the rationality of our fitting.

24 **Simulation made on  $\text{Co}_2\text{MnO}_4$  model with various Co vacancies.** The simulation was  
25 conducted with the same procedure as that for Co K-edge EXAFS fitting of  $\text{Co}_2\text{MnO}_4$ . All the  
26 parameters including the amplitude reduction factor  $S_0^2$ , the energy shift  $\Delta E_0$ , the changes in  
27 path length from the theoretical values,  $\Delta R$ , and Debye-Waller factors,  $\sigma^2$ , were fixed to the  
28 values obtained by fitting  $\text{Co}_2\text{MnO}_4$  before electrolysis. The initial occupancy of 0.841 for Co  
29 in A site and 0.527 for Co in B site were used. The simulation on the EXAFS spectra with Co  
30 vacancies in A site was conducted by fixing the B site occupancy as the initial value, while A  
31 site occupancy was multiplied by  $g_A$  factor varying from 100% to 0%. Therefore, the  $g_A$  factor  
32 was involved to correct the site contribution to  $S_0^2$  and the coordination number of the paths  
33 with A site Co as scattering atoms ( $\text{Co}_A\text{-Co}_A$  and  $\text{Co}_B\text{-Co}_A$ )<sup>64</sup>. The simulation on the EXAFS  
34 spectra with Co vacancies in B site was conducted by fixing the A site occupancy as the initial  
35 value, while B site occupancy was multiplied by  $g_B$  factor varying from 100% to 0%. Therefore,  
36 the  $g_B$  factor was involved to correct the site contribution to  $S_0^2$  and the coordination number  
37 of the paths with B site Co as scattering atoms ( $\text{Co}_B\text{-Co}_B$  and  $\text{Co}_A\text{-Co}_B$ )<sup>64</sup>. The simulation result  
38 was shown in Supplementary Figure 11.

### 1 **Supplementary Note 3. Discussion on H<sub>2</sub>SO<sub>4</sub> oxidation for Supplementary figure 18**

2 Although Qixi et al.<sup>65</sup> have reported the possibility of H<sub>2</sub>SO<sub>4</sub> oxidation, we deny the possibility  
3 of it occurring in our study based on the following 3 considerations:

4 (1) The equilibrium potential for the oxidation of HSO<sub>4</sub><sup>-</sup> to S<sub>2</sub>O<sub>8</sub><sup>2-</sup> is 2.12 V vs. RHE. This is  
5 above the maximum potential (2 V vs. RHE after *iR* corrections) applied on our Co<sub>2</sub>MnO<sub>4</sub>  
6 catalyst, and therefore, the electrochemical oxidation of H<sub>2</sub>SO<sub>4</sub> to S<sub>2</sub>O<sub>8</sub><sup>2-</sup> is thermodynamically  
7 improbable.

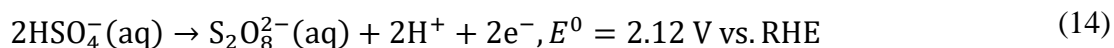

8 We believe that photocatalytic oxidation of H<sub>2</sub>SO<sub>4</sub> occurred in the study recommended by  
9 the reviewer because the photogenerated holes of WO<sub>3</sub> have an equilibrium potential of 3 V vs.  
10 RHE.

11 (2) We have performed the colorimetry procedure based on the EES paper above<sup>65</sup>. No S<sub>2</sub>O<sub>8</sub><sup>2-</sup>  
12 could be detected from the electrolyte (Supplementary Fig. 18). Namely, no peak assignable to  
13 [Fe(SCN)<sub>6</sub>]<sup>3-</sup>, which is the titration product of S<sub>2</sub>O<sub>8</sub><sup>2-</sup>, was observed after electrolysis (100 mA  
14 cm<sup>-2</sup><sub>geo</sub> at 1.72 V vs RHE after *iR* correction for 23 hours).

15 (3) We have confirmed that the dioxygen is generated from water, based on isotope labeling  
16 experiments. Namely, when OER was conducted in H<sub>2</sub><sup>18</sup>O (<sup>18</sup>O purity ≥ 98 atom%) using  
17 H<sub>2</sub>S<sup>16</sup>O<sub>4</sub> as the electrolyte at pH 0, <sup>18</sup>O<sup>18</sup>O (*m/z* = 36) was the dominant O<sub>2</sub> product (> 97%,  
18 Supplementary Fig. 17). A small peak assigned to <sup>16</sup>O<sup>18</sup>O (*m/z* = 34) were observed with a  
19 percentage of < 3%, which is consistent with the portion of H<sub>2</sub><sup>16</sup>O in H<sub>2</sub><sup>18</sup>O. As the isotope  
20 exchange between H<sub>2</sub>S<sup>16</sup>O<sub>4</sub> and H<sub>2</sub><sup>18</sup>O is negligible<sup>66</sup> (2.16×10<sup>-8</sup> M s<sup>-1</sup> at 25 °C), the <sup>18</sup>O<sup>18</sup>O  
21 detected is not due to H<sub>2</sub>SO<sub>4</sub> oxidation.

22  
23

## Supplementary References

- 1 Julien, C., Massot, M., Rangan, S., Lemal, M. & Guyomard, D. Study of structural defects in  $\gamma$ -MnO<sub>2</sub> by Raman spectroscopy. *J. Raman Spectrosc.* **33**, 223-228 (2002).
- 2 Hadjiev, V. G., Iliev, M. N. & Vergilov, I. V. The Raman spectra of Co<sub>3</sub>O<sub>4</sub>. *J. Phys. C: Solid State Phys.* **21**, L199-L201 (1988).
- 3 Gnezdilov, V. P. *et al.* Phonon Raman scattering in LaMn<sub>1-x</sub>Co<sub>x</sub>O<sub>3</sub> (x=0, 0.2, 0.3, 0.4, and 1.0). *Low Temp. Phys.* **29**, 963-966 (2003).
- 4 Iliev, M. N. *et al.* Monitoring B-site ordering and strain relaxation in NiFe<sub>2</sub>O<sub>4</sub> epitaxial films by polarized Raman spectroscopy. *Phys. Rev. B Condens. Matter* **83**, 014108 (2011).
- 5 Oku, M. & Hirokawa, K. X-ray photoelectron spectroscopy of Co<sub>3</sub>O<sub>4</sub>, Fe<sub>3</sub>O<sub>4</sub>, Mn<sub>3</sub>O<sub>4</sub>, and related compounds. *J. Electron. Spectrosc. Relat. Phenom* **8**, 475-481 (1976).
- 6 Okamoto, Y., Imanaka, T. & Teranishi, S. Surface structure of CoO-MoO<sub>3</sub>/Al<sub>2</sub>O<sub>3</sub> catalysts studied by X-ray photoelectron spectroscopy. *J. Catal.* **65**, 448-460 (1980).
- 7 Dupin, J. C., Gonbeau, D., Benqlilou-Moudden, H., Vinatier, P. & Levasseur, A. XPS analysis of new lithium cobalt oxide thin-films before and after lithium deintercalation. *Thin Solid Films* **384**, 23-32 (2001).
- 8 Ilton, E. S., Post, J. E., Heaney, P. J., Ling, F. T. & Kerisit, S. N. XPS determination of Mn oxidation states in Mn (hydr)oxides. *Appl. Surf. Sci.* **366**, 475-485 (2016).
- 9 Navrotsky, A. & Kleppa, O. J. The thermodynamics of cation distributions in simple spinels. *J. Inorg. Nucl. Chem.* **29**, 2701-2714 (1967).
- 10 Zhao, Q., Yan, Z., Chen, C. & Chen, J. Spinel: Controlled preparation, oxygen reduction/evolution reaction application, and beyond. *Chem. Rev.* **117**, 10121-10211 (2017).
- 11 Hitz, C. & Lasia, A. Experimental study and modeling of impedance of the her on porous Ni electrodes. *Journal of Electroanalytical Chemistry* **500**, 213-222 (2001).
- 12 McCrory, C. C. *et al.* Benchmarking hydrogen evolving reaction and oxygen evolving reaction electrocatalysts for solar water splitting devices. *J. Am. Chem. Soc.* **137**, 4347-4357 (2015).
- 13 Kibsgaard, J. & Chorkendorff, I. Considerations for the scaling-up of water splitting catalysts. *Nat. Energy* **4**, 430-433 (2019).
- 14 Geiger, S. *et al.* The stability number as a metric for electrocatalyst stability benchmarking. *Nat. Catal.* **1**, 508-515 (2018).
- 15 Huynh, M., Ozel, T., Liu, C., Lau, E. C. & Nocera, D. G. Design of template-stabilized active and earth-abundant oxygen evolution catalysts in acid. *Chem. Sci.* **8**, 4779-4794 (2017).
- 16 Morales Cano, F. *Manganese promotion in titania-supported cobalt Fischer-Tropsch catalysis*, Utrecht University, (2006).
- 17 Burke, M. S., Kast, M. G., Trotochaud, L., Smith, A. M. & Boettcher, S. W. Cobalt-Iron (oxy)hydroxide oxygen evolution electrocatalysts: the role of structure and composition on activity, stability, and mechanism. *J. Am. Chem. Soc.* **137**, 3638-3648 (2015).



1 18 Burke, M. S. *et al.* Revised oxygen evolution reaction activity trends for first-row transition-metal  
2 (oxy)hydroxides in alkaline media. *J. Phys. Chem. Lett.* **6**, 3737-3742 (2015).

3 19 Wagner, C. D. *et al.* Empirical atomic sensitivity factors for quantitative analysis by electron  
4 spectroscopy for chemical analysis. *Surf. Interface Anal.* **3**, 211-225 (1981).

5 20 Li, A. *et al.* Stable potential windows for long-term electrocatalysis by manganese oxides under acidic  
6 conditions. *Angew. Chem. Int. Ed.* **58**, 5054-5058 (2019).

7 21 Ghadge, S. D. *et al.* Computational and experimental study of fluorine doped (Mn<sub>1-x</sub>Nb<sub>x</sub>)O<sub>2</sub> nanorod  
8 electrocatalysts for acid-mediated oxygen evolution reaction. *ACS Applied Energy Materials* **3**, 541-  
9 557 (2020).

10 22 Moreno-Hernandez, I. A. *et al.* Crystalline nickel manganese antimonate as a stable water-oxidation  
11 catalyst in aqueous 1.0 M H<sub>2</sub>SO<sub>4</sub>. *Energy Environ. Sci.* **10**, 2103-2108 (2017).

12 23 Mondschein, J. S. *et al.* Crystalline cobalt oxide films for sustained electrocatalytic oxygen evolution  
13 under strongly acidic conditions. *Chem. Mater.* **29**, 950-957 (2017).

14 24 Frydendal, R., Paoli, E. A., Chorkendorff, I., Rossmeyl, J. & Stephens, I. E. L. Toward an active and  
15 stable catalyst for oxygen evolution in acidic media: Ti-stabilized MnO<sub>2</sub>. *Adv. Energy Mater.* **5**,  
16 1500991 (2015).

17 25 Huynh, M., Bediako, D. K. & Nocera, D. G. A functionally stable manganese oxide oxygen evolution  
18 catalyst in acid. *J. Am. Chem. Soc.* **136**, 6002-6010 (2014).

19 26 Huynh, M., Shi, C., Billinge, S. J. & Nocera, D. G. Nature of activated manganese oxide for oxygen  
20 evolution. *J. Am. Chem. Soc.* **137**, 14887-14904 (2015).

21 27 Han, L. *et al.* Enhanced activity and acid pH stability of Prussian blue-type oxygen evolution  
22 electrocatalysts processed by chemical etching. *J. Am. Chem. Soc.* **138**, 16037-16045 (2016).

23 28 Blasco-Ahicart, M., Soriano-Lopez, J., Carbo, J. J., Poblet, J. M. & Galan-Mascaros, J. R.  
24 Polyoxometalate electrocatalysts based on earth-abundant metals for efficient water oxidation in acidic  
25 media. *Nat. Chem.* **10**, 24-30 (2018).

26 29 Mondschein, J. S. *et al.* Intermetallic Ni<sub>2</sub>Ta electrocatalyst for the oxygen evolution reaction in highly  
27 acidic electrolytes. *Inorg. Chem.* **57**, 6010-6015 (2018).

28 30 Delgado, D., Minakshi, M., McGinnity, J. & Kim, D.-J. Co/Mo bimetallic addition to electrolytic  
29 manganese dioxide for oxygen generation in acid medium. *Sci. Rep.* **5**, 15208 (2015).

30 31 Kwong, W. L., Lee, C. C., Shchukarev, A. & Messinger, J. Cobalt-doped hematite thin films for  
31 electrocatalytic water oxidation in highly acidic media. *Chem. Commun.* **55**, 5017-5020 (2019).

32 32 Kwong, W. L., Lee, C. C., Shchukarev, A., Björn, E. & Messinger, J. High-performance iron (III)  
33 oxide electrocatalyst for water oxidation in strongly acidic media. *J. Catal.* **365**, 29-35 (2018).

34 33 Hu, Q. *et al.* Coupling pentlandite nanoparticles and dual-doped carbon networks to yield efficient and  
35 stable electrocatalysts for acid water oxidation. *Journal of Materials Chemistry A* **7**, 461-468 (2019).

36 34 Chatti, M. *et al.* Intrinsically stable in situ generated electrocatalyst for long-term oxidation of acidic  
37 water at up to 80 °C. *Nat. Catal.* **2**, 457-465 (2019).

1 35 Yan, K.-L. *et al.* Mesoporous Ag-doped Co<sub>3</sub>O<sub>4</sub> nanowire arrays supported on FTO as efficient  
2 electrocatalysts for oxygen evolution reaction in acidic media. *Renew. Energy* **119**, 54-61 (2018).

3 36 Bloor, L. G., Molina, P. I., Symes, M. D. & Cronin, L. Low pH electrolytic water splitting using earth-  
4 abundant metastable catalysts that self-assemble in situ. *J. Am. Chem. Soc.* **136**, 3304-3311 (2014).

5 37 Hu, F. *et al.* Amorphous metallic NiFeP: A conductive bulk material achieving high activity for oxygen  
6 evolution reaction in both alkaline and acidic media. *Adv. Mater.* **29**, 1606570 (2017).

7 38 Patel, P. P. *et al.* Noble metal-free bifunctional oxygen evolution and oxygen reduction acidic media  
8 electro-catalysts. *Sci. Rep.* **6**, 28367 (2016).

9 39 Wu, J. *et al.* Exfoliated 2D transition metal disulfides for enhanced electrocatalysis of oxygen evolution  
10 reaction in acidic medium. *Adv. Mater. Inter.* **3**, 1500669 (2016).

11 40 Schäfer, H. *et al.* Steel-based electrocatalysts for efficient and durable oxygen evolution in acidic  
12 media. *Catal. Sci. Technol.* **8**, 2104-2116 (2018).

13 41 Zhou, L. *et al.* Rutile alloys in the Mn–Sb–O system stabilize Mn<sup>3+</sup> to enable oxygen evolution in  
14 strong acid. *ACS Catal.* **8**, 10938-10948 (2018).

15 42 Anantharaj, S., Karthick, K. & Kundu, S. Spinel cobalt titanium binary oxide as an all-non-precious  
16 water oxidation electrocatalyst in acid. *Inorg. Chem.* **58**, 8570-8576 (2019).

17 43 Ghadge, S. D. *et al.* Influence of defects on activity-stability of Cu<sub>1.5</sub>Mn<sub>1.5</sub>O<sub>4</sub> for acid-mediated oxygen  
18 evolution reaction. *J. Electrochem. Soc.* **167** (2020).

19 44 Sun, W., Song, Y., Gong, X.-Q., Cao, L.-m. & Yang, J. Hollandite structure K<sub>x<0.25</sub>IrO<sub>2</sub> catalyst with  
20 highly efficient oxygen evolution reaction. *ACS Applied Materials & Interfaces* **8**, 820-826 (2016).

21 45 DeSario, P. A., Chervin, C. N., Nelson, E. S., Sassin, M. B. & Rolison, D. R. Competitive oxygen  
22 evolution in acid electrolyte catalyzed at technologically relevant electrodes painted with nanoscale  
23 RuO<sub>2</sub>. *ACS Applied Materials & Interfaces* **9**, 2387-2395 (2017).

24 46 Pi, Y., Shao, Q., Wang, P., Guo, J. & Huang, X. General formation of monodisperse IrM (M = Ni, Co,  
25 Fe) bimetallic nanoclusters as bifunctional electrocatalysts for acidic overall water splitting. *Advanced*  
26 *Functional Materials* **27**, 1700886 (2017).

27 47 Lettenmeier, P. *et al.* Nanosized IrO(x)-Ir catalyst with relevant activity for anodes of proton exchange  
28 membrane electrolysis produced by a cost-effective procedure. *Angew Chem Int Ed Engl* **55**, 742-746  
29 (2016).

30 48 Sardar, K. *et al.* Bismuth Iridium oxide oxygen evolution catalyst from hydrothermal synthesis. *Chem.*  
31 *Mater.* **24**, 4192-4200 (2012).

32 49 Lettenmeier, P. *et al.* Highly active nano-sized iridium catalysts: synthesis and operando spectroscopy  
33 in a proton exchange membrane electrolyzer. *Chem. Sci.* **9**, 3570-3579 (2018).

34 50 Li, G., Li, S., Ge, J., Liu, C. & Xing, W. Discontinuously covered IrO<sub>2</sub>–RuO<sub>2</sub>@Ru electrocatalysts for  
35 the oxygen evolution reaction: how high activity and long-term durability can be simultaneously  
36 realized in the synergistic and hybrid nano-structure. *Journal of Materials Chemistry A* **5**, 17221-17229  
37 (2017).

1 51 Weber, D. *et al.* IrOOH nanosheets as acid stable electrocatalysts for the oxygen evolution reaction.  
2 *Journal of Materials Chemistry A* **6**, 21558-21566 (2018).

3 52 Lee, Y., Suntivich, J., May, K. J., Perry, E. E. & Shao-Horn, Y. Synthesis and activities of rutile IrO<sub>2</sub>  
4 and RuO<sub>2</sub> nanoparticles for oxygen evolution in acid and alkaline solutions. *J. Phys. Chem. Lett.* **3**,  
5 399-404 (2012).

6 53 Yang, L. *et al.* Efficient oxygen evolution electrocatalysis in acid by a perovskite with face-sharing  
7 IrO<sub>6</sub> octahedral dimers. *Nat. Commun.* **9**, 5236 (2018).

8 54 Lin, Y. *et al.* Chromium-ruthenium oxide solid solution electrocatalyst for highly efficient oxygen  
9 evolution reaction in acidic media. *Nat. Commun.* **10**, 162 (2019).

10 55 Yao, Y. *et al.* Engineering the electronic structure of single atom Ru sites via compressive strain boosts  
11 acidic water oxidation electrocatalysis. *Nat. Catal.* **2**, 304-313 (2019).

12 56 Cao, X.-M., Burch, R., Hardacre, C. & Hu, P. An understanding of chemoselective hydrogenation on  
13 crotonaldehyde over Pt(111) in the free energy landscape: the microkinetics study based on first-  
14 principles calculations. *Catal. Today* **165**, 71-79 (2011).

15 57 Calle-Vallejo, F., Martínez, J. I., García-Lastra, J. M., Abad, E. & Koper, M. T. M. Oxygen reduction  
16 and evolution at single-metal active sites: Comparison between functionalized graphitic materials and  
17 protoporphyrins. *Surf. Sci.* **607**, 47-53 (2013).

18 58 Mathew, K., Sundararaman, R., Letchworth-Weaver, K., Arias, T. A. & Hennig, R. G. Implicit  
19 solvation model for density-functional study of nanocrystal surfaces and reaction pathways. *J. Chem.*  
20 *Phys.* **140**, 084106 (2014).

21 59 Izumi, F. & Momma, K. Three-Dimensional Visualization in Powder Diffraction. *Solid State*  
22 *Phenomena* **130**, 15-20 (2007).

23 60 Wei, C. *et al.* Cations in octahedral sites: A descriptor for oxygen electrocatalysis on transition-metal  
24 spinels. *Adv. Mater.* **29**, 1606800 (2017).

25 61 Ravel, B. & Newville, M. ATHENA, ARTEMIS, HEPHAESTUS: data analysis for X-ray absorption  
26 spectroscopy using IFEFFIT. *J. Synchrotron Radiat.* **12**, 537-541 (2005).

27 62 Ravel, B. in *X - Ray Absorption and X - Ray Emission Spectroscopy* 281-302 (2016).

28 63 Artemis: EXAFS Data Analysis using Feff with Larch or Ifeffit.  
29 <https://bruceravel.github.io/demeter/documents/Artemis/extended/dopants.html>.

30 64 Saratovsky, I., Wightman, P. G., Pastén, P. A., Gaillard, J.-F. & Poepelmeier, K. R. Manganese  
31 Oxides: Parallels between Abiotic and Biotic Structures. *J. Am. Chem. Soc.* **128**, 11188-11198 (2006).

32 65 Mi, Q., Zhanaidarova, A., Brunshwig, B. S., Gray, H. B. & Lewis, N. S. A quantitative assessment of  
33 the competition between water and anion oxidation at WO<sub>3</sub> photoanodes in acidic aqueous electrolytes.  
34 *Energy Environ. Sci.* **5**, 5694-5700 (2012).

35 66 Hoering, T. C. & Kennedy, J. W. The exchange of oxygen between sulfuric acid and water<sup>1</sup>. *J. Am.*  
36 *Chem. Soc.* **79**, 56-60 (1957).

37  
38
